# Supplementary material for: Constraints on neural redundancy
Source: eLife journal article supplement (doi:10.7554/elife.36774), 2018-08-15
Supplement: supp [file elife-36774-supp-v1.zip]

Archive with 15 entries (15 files):
- elife_poa_e36774_Transparent_Reporting_File.pdf
- elife_poa_e36774_Figure_6_figure_supplement_1.pdf
- elife_poa_e36774_Figure_6_source_data_1.csv
- elife_poa_e36774_Figure_5_figure_supplement_4.pdf
- elife_poa_e36774_Figure_5_figure_supplement_2.pdf
- elife_poa_e36774_Figure_3_source_data_1.csv
- elife_poa_e36774_Figure_4_source_data_1.csv
- elife_poa_e36774_Supplementary_File_1.xlsx
- elife_poa_e36774_Appendix_figure_1.pdf
- elife_poa_e36774_Figure_1_figure_supplement_1.pdf
- elife_poa_e36774_Figure_2_source_data_1.csv
- elife_poa_e36774_Figure_5_figure_supplement_3.pdf
- elife_poa_e36774_Figure_6_figure_supplement_2.pdf
- elife_poa_e36774_Figure_5_figure_supplement_1.pdf
- elife_poa_e36774_Figure_5_source_data_1.csv
