# Supplementary material for: Constraints on neural redundancy
Source: eLife journal article supplement (doi:10.7554/elife.36774), 2018-08-15
Supplement: supp [file elife-36774-supp-v1.zip › elife_poa_e36774_Figure_2_source_data_1.csv]

target	dimension	bin_center	data	predicted	hypothesisName
0	1	-11.6483584860563	0	0	Minimal_Firing
45	1	-11.6483584860563	0	0	Minimal_Firing
90	1	-11.6483584860563	0	0	Minimal_Firing
135	1	-11.6483584860563	0	0	Minimal_Firing
180	1	-11.6483584860563	0	0	Minimal_Firing
225	1	-11.6483584860563	0	0	Minimal_Firing
270	1	-11.6483584860563	0	0	Minimal_Firing
315	1	-11.6483584860563	0	0	Minimal_Firing
0	1	-10.3204453665141	0	0	Minimal_Firing
45	1	-10.3204453665141	0	0	Minimal_Firing
90	1	-10.3204453665141	0	0	Minimal_Firing
135	1	-10.3204453665141	0	0	Minimal_Firing
180	1	-10.3204453665141	0	0	Minimal_Firing
225	1	-10.3204453665141	0	0	Minimal_Firing
270	1	-10.3204453665141	0	0	Minimal_Firing
315	1	-10.3204453665141	0	0	Minimal_Firing
0	1	-8.9925322469719	0	0.00799004047738817	Minimal_Firing
45	1	-8.9925322469719	0	0.00066642594247242	Minimal_Firing
90	1	-8.9925322469719	0	0	Minimal_Firing
135	1	-8.9925322469719	0	0.0058680102467052	Minimal_Firing
180	1	-8.9925322469719	0	0.0224489822897891	Minimal_Firing
225	1	-8.9925322469719	0	0.122071583024115	Minimal_Firing
270	1	-8.9925322469719	0	0.233310407406065	Minimal_Firing
315	1	-8.9925322469719	0	0.0640903246803263	Minimal_Firing
0	1	-7.66461912742972	0	0.260675070574789	Minimal_Firing
45	1	-7.66461912742972	0	0.0979646135434457	Minimal_Firing
90	1	-7.66461912742972	0	0.0914060630613206	Minimal_Firing
135	1	-7.66461912742972	0	0.207336362050251	Minimal_Firing
180	1	-7.66461912742972	0	0.436734746364988	Minimal_Firing
225	1	-7.66461912742972	0	0.515795421228654	Minimal_Firing
270	1	-7.66461912742972	0	0.492030859183088	Minimal_Firing
315	1	-7.66461912742972	0	0.520733888027652	Minimal_Firing
0	1	-6.33670600788754	0	0.42546965542092	Minimal_Firing
45	1	-6.33670600788754	0	0.47649454886778	Minimal_Firing
90	1	-6.33670600788754	0	0.420675631134487	Minimal_Firing
135	1	-6.33670600788754	0	0.377508659204702	Minimal_Firing
180	1	-6.33670600788754	0	0.228571456041489	Minimal_Firing
225	1	-6.33670600788754	0	0.110036356528779	Minimal_Firing
270	1	-6.33670600788754	0	0.0254100443709576	Minimal_Firing
315	1	-6.33670600788754	0.00160225811700816	0.16503258605184	Minimal_Firing
0	1	-5.00879288834536	0.0129838157757558	0.0589265485207377	Minimal_Firing
45	1	-5.00879288834536	0.00066642594247242	0.16793933750305	Minimal_Firing
90	1	-5.00879288834536	0	0.217089399770636	Minimal_Firing
135	1	-5.00879288834536	0	0.138876242505357	Minimal_Firing
180	1	-5.00879288834536	0	0.0510204142949752	Minimal_Firing
225	1	-5.00879288834536	0	0.00343863614152436	Minimal_Firing
270	1	-5.00879288834536	0.00462000806744684	0.00231000403372342	Minimal_Firing
315	1	-5.00879288834536	0.0769083896163916	0.00320451623401632	Minimal_Firing
0	1	-3.68087976880318	0.179775910741234	0	Minimal_Firing
45	1	-3.68087976880318	0.0273234636413692	0.0099963891370863	Minimal_Firing
90	1	-3.68087976880318	0.00207741052412092	0.0238902210273906	Minimal_Firing
135	1	-3.68087976880318	0.0019560034155684	0.0215160375712524	Minimal_Firing
180	1	-3.68087976880318	0	0.0102040828589951	Minimal_Firing
225	1	-3.68087976880318	0.00515795421228654	0.00171931807076218	Minimal_Firing
270	1	-3.68087976880318	0.0508200887419152	0	Minimal_Firing
315	1	-3.68087976880318	0.33967872080573	0	Minimal_Firing
0	1	-2.352966649261	0.302622783081077	0	Minimal_Firing
45	1	-2.352966649261	0.16527363373316	0	Minimal_Firing
90	1	-2.352966649261	0.0332385683859348	0	Minimal_Firing
135	1	-2.352966649261	0.0019560034155684	0	Minimal_Firing
180	1	-2.352966649261	0.00408163314359802	0.00204081657179901	Minimal_Firing
225	1	-2.352966649261	0.0343863614152436	0	Minimal_Firing
270	1	-2.352966649261	0.17556030656298	0	Minimal_Firing
315	1	-2.352966649261	0.227520652615159	0	Minimal_Firing
0	1	-1.02505352971882	0.166792094965478	0	Minimal_Firing
45	1	-1.02505352971882	0.249243302484685	0	Minimal_Firing
90	1	-1.02505352971882	0.131915568281679	0	Minimal_Firing
135	1	-1.02505352971882	0.00782401366227361	0	Minimal_Firing
180	1	-1.02505352971882	0.0265306154333871	0	Minimal_Firing
225	1	-1.02505352971882	0.115194310741066	0	Minimal_Firing
270	1	-1.02505352971882	0.272580475979363	0	Minimal_Firing
315	1	-1.02505352971882	0.0817151639674161	0	Minimal_Firing
0	1	0.302859589823361	0.0699128541771465	0	Minimal_Firing
45	1	0.302859589823361	0.193929949259474	0	Minimal_Firing
90	1	0.302859589823361	0.194237884005306	0	Minimal_Firing
135	1	0.302859589823361	0.0606361058826205	0.0019560034155684	Minimal_Firing
180	1	0.302859589823361	0.0448979645795782	0	Minimal_Firing
225	1	0.302859589823361	0.168493170934694	0	Minimal_Firing
270	1	0.302859589823361	0.147840258158299	0	Minimal_Firing
315	1	0.302859589823361	0.0224316136381142	0	Minimal_Firing
0	1	1.63077270936554	0.0199751011934704	0	Minimal_Firing
45	1	1.63077270936554	0.0833032428090525	0	Minimal_Firing
90	1	1.63077270936554	0.165154136667613	0	Minimal_Firing
135	1	1.63077270936554	0.133008232258651	0	Minimal_Firing
180	1	1.63077270936554	0.10408164516175	0.00204081657179901	Minimal_Firing
225	1	1.63077270936554	0.190844305854602	0	Minimal_Firing
270	1	1.63077270936554	0.071610125045426	0	Minimal_Firing
315	1	1.63077270936554	0.00320451623401632	0	Minimal_Firing
0	1	2.95868582890772	0.000998755059673521	0	Minimal_Firing
45	1	2.95868582890772	0.0279898895838416	0	Minimal_Firing
90	1	2.95868582890772	0.126722041971376	0	Minimal_Firing
135	1	2.95868582890772	0.144744252752062	0	Minimal_Firing
180	1	2.95868582890772	0.167346958887519	0	Minimal_Firing
225	1	2.95868582890772	0.106597720387255	0	Minimal_Firing
270	1	2.95868582890772	0.0207900363035108	0	Minimal_Firing
315	1	2.95868582890772	0	0	Minimal_Firing
0	1	4.2865989484499	0	0	Minimal_Firing
45	1	4.2865989484499	0.00399855565483452	0	Minimal_Firing
90	1	4.2865989484499	0.0592061999374463	0	Minimal_Firing
135	1	4.2865989484499	0.150612262998767	0	Minimal_Firing
180	1	4.2865989484499	0.138775526882333	0	Minimal_Firing
225	1	4.2865989484499	0.0756499951135359	0	Minimal_Firing
270	1	4.2865989484499	0.00231000403372342	0	Minimal_Firing
315	1	4.2865989484499	0	0	Minimal_Firing
0	1	5.61451206799209	0	0	Minimal_Firing
45	1	5.61451206799209	0.00133285188494484	0	Minimal_Firing
90	1	5.61451206799209	0.0321998631238743	0	Minimal_Firing
135	1	5.61451206799209	0.117360204934104	0	Minimal_Firing
180	1	5.61451206799209	0.132653077166936	0	Minimal_Firing
225	1	5.61451206799209	0.037824997556768	0	Minimal_Firing
270	1	5.61451206799209	0.00693001210117026	0	Minimal_Firing
315	1	5.61451206799209	0	0	Minimal_Firing
0	1	6.94242518753427	0	0	Minimal_Firing
45	1	6.94242518753427	0	0	Minimal_Firing
90	1	6.94242518753427	0.00727093683442323	0	Minimal_Firing
135	1	6.94242518753427	0.0821521434538729	0	Minimal_Firing
180	1	6.94242518753427	0.0816326628719604	0	Minimal_Firing
225	1	6.94242518753427	0.00687727228304872	0	Minimal_Firing
270	1	6.94242518753427	0	0	Minimal_Firing
315	1	6.94242518753427	0	0	Minimal_Firing
0	1	8.27033830707645	0	0	Minimal_Firing
45	1	8.27033830707645	0	0	Minimal_Firing
90	1	8.27033830707645	0.00103870526206046	0	Minimal_Firing
135	1	8.27033830707645	0.0449880785580732	0	Minimal_Firing
180	1	8.27033830707645	0.0306122485769851	0	Minimal_Firing
225	1	8.27033830707645	0.0103159084245731	0	Minimal_Firing
270	1	8.27033830707645	0	0	Minimal_Firing
315	1	8.27033830707645	0	0	Minimal_Firing
0	1	9.59825142661863	0	0	Minimal_Firing
45	1	9.59825142661863	0	0	Minimal_Firing
90	1	9.59825142661863	0	0	Minimal_Firing
135	1	9.59825142661863	0.00586801024670521	0	Minimal_Firing
180	1	9.59825142661863	0.0163265325743921	0	Minimal_Firing
225	1	9.59825142661863	0.00171931807076218	0	Minimal_Firing
270	1	9.59825142661863	0	0	Minimal_Firing
315	1	9.59825142661863	0	0	Minimal_Firing
0	1	10.9261645461608	0	0	Minimal_Firing
45	1	10.9261645461608	0	0	Minimal_Firing
90	1	10.9261645461608	0	0	Minimal_Firing
135	1	10.9261645461608	0.0019560034155684	0	Minimal_Firing
180	1	10.9261645461608	0.00204081657179901	0	Minimal_Firing
225	1	10.9261645461608	0	0	Minimal_Firing
270	1	10.9261645461608	0	0	Minimal_Firing
315	1	10.9261645461608	0	0	Minimal_Firing
0	1	12.254077665703	0	0	Minimal_Firing
45	1	12.254077665703	0	0	Minimal_Firing
90	1	12.254077665703	0	0	Minimal_Firing
135	1	12.254077665703	0	0	Minimal_Firing
180	1	12.254077665703	0.00204081657179901	0	Minimal_Firing
225	1	12.254077665703	0	0	Minimal_Firing
270	1	12.254077665703	0	0	Minimal_Firing
315	1	12.254077665703	0	0	Minimal_Firing
0	1	13.5819907852452	0	0	Minimal_Firing
45	1	13.5819907852452	0	0	Minimal_Firing
90	1	13.5819907852452	0	0	Minimal_Firing
135	1	13.5819907852452	0	0	Minimal_Firing
180	1	13.5819907852452	0.00204081657179901	0	Minimal_Firing
225	1	13.5819907852452	0	0	Minimal_Firing
270	1	13.5819907852452	0	0	Minimal_Firing
315	1	13.5819907852452	0	0	Minimal_Firing
0	1	14.9099039047874	0	0	Minimal_Firing
45	1	14.9099039047874	0	0	Minimal_Firing
90	1	14.9099039047874	0	0	Minimal_Firing
135	1	14.9099039047874	0	0	Minimal_Firing
180	1	14.9099039047874	0	0	Minimal_Firing
225	1	14.9099039047874	0	0	Minimal_Firing
270	1	14.9099039047874	0	0	Minimal_Firing
315	1	14.9099039047874	0	0	Minimal_Firing
0	1	16.2378170243295	0	0	Minimal_Firing
45	1	16.2378170243295	0	0	Minimal_Firing
90	1	16.2378170243295	0	0	Minimal_Firing
135	1	16.2378170243295	0	0	Minimal_Firing
180	1	16.2378170243295	0	0	Minimal_Firing
225	1	16.2378170243295	0	0	Minimal_Firing
270	1	16.2378170243295	0	0	Minimal_Firing
315	1	16.2378170243295	0	0	Minimal_Firing
0	2	-11.6483584860563	0	0	Minimal_Firing
45	2	-11.6483584860563	0	0	Minimal_Firing
90	2	-11.6483584860563	0	0	Minimal_Firing
135	2	-11.6483584860563	0	0	Minimal_Firing
180	2	-11.6483584860563	0	0	Minimal_Firing
225	2	-11.6483584860563	0	0	Minimal_Firing
270	2	-11.6483584860563	0	0	Minimal_Firing
315	2	-11.6483584860563	0	0	Minimal_Firing
0	2	-10.3204453665141	0	0	Minimal_Firing
45	2	-10.3204453665141	0	0	Minimal_Firing
90	2	-10.3204453665141	0	0	Minimal_Firing
135	2	-10.3204453665141	0	0	Minimal_Firing
180	2	-10.3204453665141	0	0	Minimal_Firing
225	2	-10.3204453665141	0	0	Minimal_Firing
270	2	-10.3204453665141	0	0	Minimal_Firing
315	2	-10.3204453665141	0	0	Minimal_Firing
0	2	-8.9925322469719	0	0	Minimal_Firing
45	2	-8.9925322469719	0	0	Minimal_Firing
90	2	-8.9925322469719	0	0	Minimal_Firing
135	2	-8.9925322469719	0	0	Minimal_Firing
180	2	-8.9925322469719	0	0	Minimal_Firing
225	2	-8.9925322469719	0	0	Minimal_Firing
270	2	-8.9925322469719	0	0	Minimal_Firing
315	2	-8.9925322469719	0	0	Minimal_Firing
0	2	-7.66461912742972	0	0	Minimal_Firing
45	2	-7.66461912742972	0	0	Minimal_Firing
90	2	-7.66461912742972	0	0	Minimal_Firing
135	2	-7.66461912742972	0	0	Minimal_Firing
180	2	-7.66461912742972	0	0	Minimal_Firing
225	2	-7.66461912742972	0	0	Minimal_Firing
270	2	-7.66461912742972	0	0	Minimal_Firing
315	2	-7.66461912742972	0	0	Minimal_Firing
0	2	-6.33670600788754	0	0	Minimal_Firing
45	2	-6.33670600788754	0	0	Minimal_Firing
90	2	-6.33670600788754	0	0	Minimal_Firing
135	2	-6.33670600788754	0	0	Minimal_Firing
180	2	-6.33670600788754	0	0	Minimal_Firing
225	2	-6.33670600788754	0	0	Minimal_Firing
270	2	-6.33670600788754	0	0	Minimal_Firing
315	2	-6.33670600788754	0	0	Minimal_Firing
0	2	-5.00879288834536	0	0	Minimal_Firing
45	2	-5.00879288834536	0.00466498159730694	0	Minimal_Firing
90	2	-5.00879288834536	0.00934834735854415	0	Minimal_Firing
135	2	-5.00879288834536	0.0019560034155684	0	Minimal_Firing
180	2	-5.00879288834536	0	0	Minimal_Firing
225	2	-5.00879288834536	0	0	Minimal_Firing
270	2	-5.00879288834536	0	0	Minimal_Firing
315	2	-5.00879288834536	0	0	Minimal_Firing
0	2	-3.68087976880318	0.00599253035804113	0	Minimal_Firing
45	2	-3.68087976880318	0.0499819456854315	0	Minimal_Firing
90	2	-3.68087976880318	0.0716706630821718	0	Minimal_Firing
135	2	-3.68087976880318	0.0567240990514837	0	Minimal_Firing
180	2	-3.68087976880318	0.0122448994307941	0	Minimal_Firing
225	2	-3.68087976880318	0	0	Minimal_Firing
270	2	-3.68087976880318	0	0	Minimal_Firing
315	2	-3.68087976880318	0	0	Minimal_Firing
0	2	-2.352966649261	0.0759053845351876	0	Minimal_Firing
45	2	-2.352966649261	0.20659204216645	0	Minimal_Firing
90	2	-2.352966649261	0.184889536646762	0.00103870526206046	Minimal_Firing
135	2	-2.352966649261	0.174084303985588	0	Minimal_Firing
180	2	-2.352966649261	0.0632653137257693	0	Minimal_Firing
225	2	-2.352966649261	0.00515795421228654	0	Minimal_Firing
270	2	-2.352966649261	0.00231000403372342	0	Minimal_Firing
315	2	-2.352966649261	0.00320451623401632	0	Minimal_Firing
0	2	-1.02505352971882	0.31760410897618	0.0449439776853084	Minimal_Firing
45	2	-1.02505352971882	0.279232469895944	0.0819703909241077	Minimal_Firing
90	2	-1.02505352971882	0.198392705053548	0.0914060630613206	Minimal_Firing
135	2	-1.02505352971882	0.211248368881387	0.0567240990514837	Minimal_Firing
180	2	-1.02505352971882	0.18571430803371	0.0142857160025931	Minimal_Firing
225	2	-1.02505352971882	0.085965903538109	0.00343863614152436	Minimal_Firing
270	2	-1.02505352971882	0.0231000403372342	0	Minimal_Firing
315	2	-1.02505352971882	0.161828069817824	0.0128180649360653	Minimal_Firing
0	2	0.302859589823361	0.297629007782709	0.546319017641416	Minimal_Firing
45	2	0.302859589823361	0.179268578525081	0.565129199216612	Minimal_Firing
90	2	0.302859589823361	0.162038020881432	0.511042988933747	Minimal_Firing
135	2	0.302859589823361	0.18386432106343	0.47726483339869	Minimal_Firing
180	2	0.302859589823361	0.293877586339057	0.271428604049268	Minimal_Firing
225	2	0.302859589823361	0.331828387657101	0.142703399873261	Minimal_Firing
270	2	0.302859589823361	0.258720451777023	0.117810205719894	Minimal_Firing
315	2	0.302859589823361	0.414984852305113	0.440620982177244	Minimal_Firing
0	2	1.63077270936554	0.0519352631030231	0.16179831966711	Minimal_Firing
45	2	1.63077270936554	0.0279898895838416	0.105295298910642	Minimal_Firing
90	2	1.63077270936554	0.0862125367510183	0.148534852474646	Minimal_Firing
135	2	1.63077270936554	0.109536191271831	0.213204372296956	Minimal_Firing
180	2	1.63077270936554	0.177551041746514	0.418367397218797	Minimal_Firing
225	2	1.63077270936554	0.287126117817284	0.529549965794751	Minimal_Firing
270	2	1.63077270936554	0.318780556653832	0.563640984228514	Minimal_Firing
315	2	1.63077270936554	0.153816779232783	0.298020009763518	Minimal_Firing
0	2	2.95868582890772	0.00399502023869408	0	Minimal_Firing
45	2	2.95868582890772	0.00533140753977936	0.00066642594247242	Minimal_Firing
90	2	2.95868582890772	0.0311611578618138	0.00103870526206046	Minimal_Firing
135	2	2.95868582890772	0.0156480273245472	0.00586801024670521	Minimal_Firing
180	2	2.95868582890772	0.0183673491461911	0.0469387811513772	Minimal_Firing
225	2	2.95868582890772	0.0429829517690545	0.0739306770427737	Minimal_Firing
270	2	2.95868582890772	0.143220250090852	0.071610125045426	Minimal_Firing
315	2	2.95868582890772	0.0192270974040979	0.00160225811700816	Minimal_Firing
0	2	4.2865989484499	0	0	Minimal_Firing
45	2	4.2865989484499	0	0	Minimal_Firing
90	2	4.2865989484499	0.00830964209648369	0	Minimal_Firing
135	2	4.2865989484499	0	0	Minimal_Firing
180	2	4.2865989484499	0.00204081657179901	0.00204081657179901	Minimal_Firing
225	2	4.2865989484499	0	0.00343863614152436	Minimal_Firing
270	2	4.2865989484499	0.00693001210117026	0	Minimal_Firing
315	2	4.2865989484499	0	0	Minimal_Firing
0	2	5.61451206799209	0	0	Minimal_Firing
45	2	5.61451206799209	0	0	Minimal_Firing
90	2	5.61451206799209	0.00103870526206046	0	Minimal_Firing
135	2	5.61451206799209	0	0	Minimal_Firing
180	2	5.61451206799209	0	0	Minimal_Firing
225	2	5.61451206799209	0	0	Minimal_Firing
270	2	5.61451206799209	0	0	Minimal_Firing
315	2	5.61451206799209	0	0	Minimal_Firing
0	2	6.94242518753427	0	0	Minimal_Firing
45	2	6.94242518753427	0	0	Minimal_Firing
90	2	6.94242518753427	0	0	Minimal_Firing
135	2	6.94242518753427	0	0	Minimal_Firing
180	2	6.94242518753427	0	0	Minimal_Firing
225	2	6.94242518753427	0	0	Minimal_Firing
270	2	6.94242518753427	0	0	Minimal_Firing
315	2	6.94242518753427	0	0	Minimal_Firing
0	2	8.27033830707645	0	0	Minimal_Firing
45	2	8.27033830707645	0	0	Minimal_Firing
90	2	8.27033830707645	0	0	Minimal_Firing
135	2	8.27033830707645	0	0	Minimal_Firing
180	2	8.27033830707645	0	0	Minimal_Firing
225	2	8.27033830707645	0	0	Minimal_Firing
270	2	8.27033830707645	0	0	Minimal_Firing
315	2	8.27033830707645	0	0	Minimal_Firing
0	2	9.59825142661863	0	0	Minimal_Firing
45	2	9.59825142661863	0	0	Minimal_Firing
90	2	9.59825142661863	0	0	Minimal_Firing
135	2	9.59825142661863	0	0	Minimal_Firing
180	2	9.59825142661863	0	0	Minimal_Firing
225	2	9.59825142661863	0	0	Minimal_Firing
270	2	9.59825142661863	0	0	Minimal_Firing
315	2	9.59825142661863	0	0	Minimal_Firing
0	2	10.9261645461608	0	0	Minimal_Firing
45	2	10.9261645461608	0	0	Minimal_Firing
90	2	10.9261645461608	0	0	Minimal_Firing
135	2	10.9261645461608	0	0	Minimal_Firing
180	2	10.9261645461608	0	0	Minimal_Firing
225	2	10.9261645461608	0	0	Minimal_Firing
270	2	10.9261645461608	0	0	Minimal_Firing
315	2	10.9261645461608	0	0	Minimal_Firing
0	2	12.254077665703	0	0	Minimal_Firing
45	2	12.254077665703	0	0	Minimal_Firing
90	2	12.254077665703	0	0	Minimal_Firing
135	2	12.254077665703	0	0	Minimal_Firing
180	2	12.254077665703	0	0	Minimal_Firing
225	2	12.254077665703	0	0	Minimal_Firing
270	2	12.254077665703	0	0	Minimal_Firing
315	2	12.254077665703	0	0	Minimal_Firing
0	2	13.5819907852452	0	0	Minimal_Firing
45	2	13.5819907852452	0	0	Minimal_Firing
90	2	13.5819907852452	0	0	Minimal_Firing
135	2	13.5819907852452	0	0	Minimal_Firing
180	2	13.5819907852452	0	0	Minimal_Firing
225	2	13.5819907852452	0	0	Minimal_Firing
270	2	13.5819907852452	0	0	Minimal_Firing
315	2	13.5819907852452	0	0	Minimal_Firing
0	2	14.9099039047874	0	0	Minimal_Firing
45	2	14.9099039047874	0	0	Minimal_Firing
90	2	14.9099039047874	0	0	Minimal_Firing
135	2	14.9099039047874	0	0	Minimal_Firing
180	2	14.9099039047874	0	0	Minimal_Firing
225	2	14.9099039047874	0	0	Minimal_Firing
270	2	14.9099039047874	0	0	Minimal_Firing
315	2	14.9099039047874	0	0	Minimal_Firing
0	2	16.2378170243295	0	0	Minimal_Firing
45	2	16.2378170243295	0	0	Minimal_Firing
90	2	16.2378170243295	0	0	Minimal_Firing
135	2	16.2378170243295	0	0	Minimal_Firing
180	2	16.2378170243295	0	0	Minimal_Firing
225	2	16.2378170243295	0	0	Minimal_Firing
270	2	16.2378170243295	0	0	Minimal_Firing
315	2	16.2378170243295	0	0	Minimal_Firing
0	3	-11.6483584860563	0	0	Minimal_Firing
45	3	-11.6483584860563	0	0	Minimal_Firing
90	3	-11.6483584860563	0	0	Minimal_Firing
135	3	-11.6483584860563	0	0	Minimal_Firing
180	3	-11.6483584860563	0	0	Minimal_Firing
225	3	-11.6483584860563	0	0	Minimal_Firing
270	3	-11.6483584860563	0	0	Minimal_Firing
315	3	-11.6483584860563	0	0	Minimal_Firing
0	3	-10.3204453665141	0	0	Minimal_Firing
45	3	-10.3204453665141	0	0	Minimal_Firing
90	3	-10.3204453665141	0	0	Minimal_Firing
135	3	-10.3204453665141	0	0	Minimal_Firing
180	3	-10.3204453665141	0	0	Minimal_Firing
225	3	-10.3204453665141	0	0	Minimal_Firing
270	3	-10.3204453665141	0	0	Minimal_Firing
315	3	-10.3204453665141	0	0	Minimal_Firing
0	3	-8.9925322469719	0	0	Minimal_Firing
45	3	-8.9925322469719	0	0	Minimal_Firing
90	3	-8.9925322469719	0	0	Minimal_Firing
135	3	-8.9925322469719	0	0	Minimal_Firing
180	3	-8.9925322469719	0	0	Minimal_Firing
225	3	-8.9925322469719	0	0	Minimal_Firing
270	3	-8.9925322469719	0	0	Minimal_Firing
315	3	-8.9925322469719	0	0	Minimal_Firing
0	3	-7.66461912742972	0	0	Minimal_Firing
45	3	-7.66461912742972	0.00066642594247242	0	Minimal_Firing
90	3	-7.66461912742972	0	0	Minimal_Firing
135	3	-7.66461912742972	0	0	Minimal_Firing
180	3	-7.66461912742972	0	0	Minimal_Firing
225	3	-7.66461912742972	0	0	Minimal_Firing
270	3	-7.66461912742972	0	0	Minimal_Firing
315	3	-7.66461912742972	0	0	Minimal_Firing
0	3	-6.33670600788754	0.000998755059673521	0	Minimal_Firing
45	3	-6.33670600788754	0.00199927782741726	0	Minimal_Firing
90	3	-6.33670600788754	0.00207741052412092	0	Minimal_Firing
135	3	-6.33670600788754	0.0019560034155684	0	Minimal_Firing
180	3	-6.33670600788754	0	0	Minimal_Firing
225	3	-6.33670600788754	0	0	Minimal_Firing
270	3	-6.33670600788754	0	0	Minimal_Firing
315	3	-6.33670600788754	0	0	Minimal_Firing
0	3	-5.00879288834536	0.00199751011934704	0	Minimal_Firing
45	3	-5.00879288834536	0.00266570376988968	0	Minimal_Firing
90	3	-5.00879288834536	0.00103870526206046	0	Minimal_Firing
135	3	-5.00879288834536	0.0039120068311368	0	Minimal_Firing
180	3	-5.00879288834536	0.00408163314359802	0	Minimal_Firing
225	3	-5.00879288834536	0	0	Minimal_Firing
270	3	-5.00879288834536	0	0	Minimal_Firing
315	3	-5.00879288834536	0.00160225811700816	0	Minimal_Firing
0	3	-3.68087976880318	0.00399502023869408	0	Minimal_Firing
45	3	-3.68087976880318	0.0173270745042829	0	Minimal_Firing
90	3	-3.68087976880318	0.0311611578618139	0	Minimal_Firing
135	3	-3.68087976880318	0.0117360204934104	0	Minimal_Firing
180	3	-3.68087976880318	0.0142857160025931	0	Minimal_Firing
225	3	-3.68087976880318	0	0	Minimal_Firing
270	3	-3.68087976880318	0	0	Minimal_Firing
315	3	-3.68087976880318	0	0	Minimal_Firing
0	3	-2.352966649261	0.0329589169692262	0.00199751011934704	Minimal_Firing
45	3	-2.352966649261	0.0699747239596041	0.0146613707343932	Minimal_Firing
90	3	-2.352966649261	0.124644631447255	0.0176579894550279	Minimal_Firing
135	3	-2.352966649261	0.0743281297915993	0.00978001707784201	Minimal_Firing
180	3	-2.352966649261	0.0489795977231762	0.00612244971539703	Minimal_Firing
225	3	-2.352966649261	0.0223511349199083	0	Minimal_Firing
270	3	-2.352966649261	0.0323400564721279	0	Minimal_Firing
315	3	-2.352966649261	0.0144203230530734	0.00160225811700816	Minimal_Firing
0	3	-1.02505352971882	0.203746032173398	0.0759053845351876	Minimal_Firing
45	3	-1.02505352971882	0.268569654816385	0.105961724853115	Minimal_Firing
90	3	-1.02505352971882	0.279411715494264	0.0903673577992602	Minimal_Firing
135	3	-1.02505352971882	0.185820324478998	0.0606361058826205	Minimal_Firing
180	3	-1.02505352971882	0.120408177736142	0.0122448994307941	Minimal_Firing
225	3	-1.02505352971882	0.187405669713078	0.00687727228304872	Minimal_Firing
270	3	-1.02505352971882	0.18942033076532	0	Minimal_Firing
315	3	-1.02505352971882	0.161828069817824	0.0176248392870897	Minimal_Firing
0	3	0.302859589823361	0.398503268809735	0.290637722364995	Minimal_Firing
45	3	0.302859589823361	0.308555211364731	0.327881563696431	Minimal_Firing
90	3	0.302859589823361	0.251366673418632	0.307456757569897	Minimal_Firing
135	3	0.302859589823361	0.254280444023892	0.283620495257418	Minimal_Firing
180	3	0.302859589823361	0.265306154333871	0.167346958887519	Minimal_Firing
225	3	0.302859589823361	0.309477252737192	0.0825272673965846	Minimal_Firing
270	3	0.302859589823361	0.339570592957343	0.043890076640745	Minimal_Firing
315	3	0.302859589823361	0.384541948081958	0.189066457806963	Minimal_Firing
0	3	1.63077270936554	0.10786554644474	0.351561781005079	Minimal_Firing
45	3	1.63077270936554	0.0826368168665801	0.281231747723361	Minimal_Firing
90	3	1.63077270936554	0.0592061999374463	0.303301936521655	Minimal_Firing
135	3	1.63077270936554	0.189732331310135	0.348168607971176	Minimal_Firing
180	3	1.63077270936554	0.228571456041489	0.418367397218797	Minimal_Firing
225	3	1.63077270936554	0.185686351642315	0.397162474346063	Minimal_Firing
270	3	1.63077270936554	0.173250302529256	0.44583077850862	Minimal_Firing
315	3	1.63077270936554	0.181055167221922	0.477472918868431	Minimal_Firing
0	3	2.95868582890772	0.00299626517902056	0.0329589169692262	Minimal_Firing
45	3	2.95868582890772	0.00066642594247242	0.0233249079865347	Minimal_Firing
90	3	2.95868582890772	0.00415482104824185	0.0342772736479952	Minimal_Firing
135	3	2.95868582890772	0.0273840478179576	0.0508560888047785	Minimal_Firing
180	3	2.95868582890772	0.0612244971539703	0.148979609741328	Minimal_Firing
225	3	2.95868582890772	0.0343863614152436	0.264774982897376	Minimal_Firing
270	3	2.95868582890772	0.0184800322697874	0.26334045984447	Minimal_Firing
315	3	2.95868582890772	0.00961354870204895	0.0672948409143427	Minimal_Firing
0	3	4.2865989484499	0	0	Minimal_Firing
45	3	4.2865989484499	0	0	Minimal_Firing
90	3	4.2865989484499	0	0	Minimal_Firing
135	3	4.2865989484499	0.0039120068311368	0	Minimal_Firing
180	3	4.2865989484499	0.0102040828589951	0	Minimal_Firing
225	3	4.2865989484499	0.0137545445660974	0.00171931807076218	Minimal_Firing
270	3	4.2865989484499	0	0	Minimal_Firing
315	3	4.2865989484499	0	0	Minimal_Firing
0	3	5.61451206799209	0	0	Minimal_Firing
45	3	5.61451206799209	0	0	Minimal_Firing
90	3	5.61451206799209	0	0	Minimal_Firing
135	3	5.61451206799209	0	0	Minimal_Firing
180	3	5.61451206799209	0	0	Minimal_Firing
225	3	5.61451206799209	0	0	Minimal_Firing
270	3	5.61451206799209	0	0	Minimal_Firing
315	3	5.61451206799209	0	0	Minimal_Firing
0	3	6.94242518753427	0	0	Minimal_Firing
45	3	6.94242518753427	0	0	Minimal_Firing
90	3	6.94242518753427	0	0	Minimal_Firing
135	3	6.94242518753427	0	0	Minimal_Firing
180	3	6.94242518753427	0	0	Minimal_Firing
225	3	6.94242518753427	0	0	Minimal_Firing
270	3	6.94242518753427	0	0	Minimal_Firing
315	3	6.94242518753427	0	0	Minimal_Firing
0	3	8.27033830707645	0	0	Minimal_Firing
45	3	8.27033830707645	0	0	Minimal_Firing
90	3	8.27033830707645	0	0	Minimal_Firing
135	3	8.27033830707645	0	0	Minimal_Firing
180	3	8.27033830707645	0	0	Minimal_Firing
225	3	8.27033830707645	0	0	Minimal_Firing
270	3	8.27033830707645	0	0	Minimal_Firing
315	3	8.27033830707645	0	0	Minimal_Firing
0	3	9.59825142661863	0	0	Minimal_Firing
45	3	9.59825142661863	0	0	Minimal_Firing
90	3	9.59825142661863	0	0	Minimal_Firing
135	3	9.59825142661863	0	0	Minimal_Firing
180	3	9.59825142661863	0	0	Minimal_Firing
225	3	9.59825142661863	0	0	Minimal_Firing
270	3	9.59825142661863	0	0	Minimal_Firing
315	3	9.59825142661863	0	0	Minimal_Firing
0	3	10.9261645461608	0	0	Minimal_Firing
45	3	10.9261645461608	0	0	Minimal_Firing
90	3	10.9261645461608	0	0	Minimal_Firing
135	3	10.9261645461608	0	0	Minimal_Firing
180	3	10.9261645461608	0	0	Minimal_Firing
225	3	10.9261645461608	0	0	Minimal_Firing
270	3	10.9261645461608	0	0	Minimal_Firing
315	3	10.9261645461608	0	0	Minimal_Firing
0	3	12.254077665703	0	0	Minimal_Firing
45	3	12.254077665703	0	0	Minimal_Firing
90	3	12.254077665703	0	0	Minimal_Firing
135	3	12.254077665703	0	0	Minimal_Firing
180	3	12.254077665703	0	0	Minimal_Firing
225	3	12.254077665703	0	0	Minimal_Firing
270	3	12.254077665703	0	0	Minimal_Firing
315	3	12.254077665703	0	0	Minimal_Firing
0	3	13.5819907852452	0	0	Minimal_Firing
45	3	13.5819907852452	0	0	Minimal_Firing
90	3	13.5819907852452	0	0	Minimal_Firing
135	3	13.5819907852452	0	0	Minimal_Firing
180	3	13.5819907852452	0	0	Minimal_Firing
225	3	13.5819907852452	0	0	Minimal_Firing
270	3	13.5819907852452	0	0	Minimal_Firing
315	3	13.5819907852452	0	0	Minimal_Firing
0	3	14.9099039047874	0	0	Minimal_Firing
45	3	14.9099039047874	0	0	Minimal_Firing
90	3	14.9099039047874	0	0	Minimal_Firing
135	3	14.9099039047874	0	0	Minimal_Firing
180	3	14.9099039047874	0	0	Minimal_Firing
225	3	14.9099039047874	0	0	Minimal_Firing
270	3	14.9099039047874	0	0	Minimal_Firing
315	3	14.9099039047874	0	0	Minimal_Firing
0	3	16.2378170243295	0	0	Minimal_Firing
45	3	16.2378170243295	0	0	Minimal_Firing
90	3	16.2378170243295	0	0	Minimal_Firing
135	3	16.2378170243295	0	0	Minimal_Firing
180	3	16.2378170243295	0	0	Minimal_Firing
225	3	16.2378170243295	0	0	Minimal_Firing
270	3	16.2378170243295	0	0	Minimal_Firing
315	3	16.2378170243295	0	0	Minimal_Firing
0	1	-11.6483584860563	0	0	Minimal_Deviation
45	1	-11.6483584860563	0	0	Minimal_Deviation
90	1	-11.6483584860563	0	0	Minimal_Deviation
135	1	-11.6483584860563	0	0	Minimal_Deviation
180	1	-11.6483584860563	0	0	Minimal_Deviation
225	1	-11.6483584860563	0	0	Minimal_Deviation
270	1	-11.6483584860563	0	0	Minimal_Deviation
315	1	-11.6483584860563	0	0	Minimal_Deviation
0	1	-10.3204453665141	0	0	Minimal_Deviation
45	1	-10.3204453665141	0	0	Minimal_Deviation
90	1	-10.3204453665141	0	0	Minimal_Deviation
135	1	-10.3204453665141	0	0	Minimal_Deviation
180	1	-10.3204453665141	0	0	Minimal_Deviation
225	1	-10.3204453665141	0	0	Minimal_Deviation
270	1	-10.3204453665141	0	0	Minimal_Deviation
315	1	-10.3204453665141	0	0	Minimal_Deviation
0	1	-8.9925322469719	0	0	Minimal_Deviation
45	1	-8.9925322469719	0	0	Minimal_Deviation
90	1	-8.9925322469719	0	0	Minimal_Deviation
135	1	-8.9925322469719	0	0	Minimal_Deviation
180	1	-8.9925322469719	0	0	Minimal_Deviation
225	1	-8.9925322469719	0	0	Minimal_Deviation
270	1	-8.9925322469719	0	0	Minimal_Deviation
315	1	-8.9925322469719	0	0	Minimal_Deviation
0	1	-7.66461912742972	0	0	Minimal_Deviation
45	1	-7.66461912742972	0	0	Minimal_Deviation
90	1	-7.66461912742972	0	0	Minimal_Deviation
135	1	-7.66461912742972	0	0	Minimal_Deviation
180	1	-7.66461912742972	0	0	Minimal_Deviation
225	1	-7.66461912742972	0	0	Minimal_Deviation
270	1	-7.66461912742972	0	0	Minimal_Deviation
315	1	-7.66461912742972	0	0	Minimal_Deviation
0	1	-6.33670600788754	0	0	Minimal_Deviation
45	1	-6.33670600788754	0	0	Minimal_Deviation
90	1	-6.33670600788754	0	0	Minimal_Deviation
135	1	-6.33670600788754	0	0	Minimal_Deviation
180	1	-6.33670600788754	0	0	Minimal_Deviation
225	1	-6.33670600788754	0	0	Minimal_Deviation
270	1	-6.33670600788754	0	0	Minimal_Deviation
315	1	-6.33670600788754	0.00160225811700816	0	Minimal_Deviation
0	1	-5.00879288834536	0.0129838157757558	0	Minimal_Deviation
45	1	-5.00879288834536	0.00066642594247242	0	Minimal_Deviation
90	1	-5.00879288834536	0	0	Minimal_Deviation
135	1	-5.00879288834536	0	0	Minimal_Deviation
180	1	-5.00879288834536	0	0	Minimal_Deviation
225	1	-5.00879288834536	0	0	Minimal_Deviation
270	1	-5.00879288834536	0.00462000806744684	0	Minimal_Deviation
315	1	-5.00879288834536	0.0769083896163916	0	Minimal_Deviation
0	1	-3.68087976880318	0.179775910741234	0	Minimal_Deviation
45	1	-3.68087976880318	0.0273234636413692	0	Minimal_Deviation
90	1	-3.68087976880318	0.00207741052412092	0	Minimal_Deviation
135	1	-3.68087976880318	0.0019560034155684	0	Minimal_Deviation
180	1	-3.68087976880318	0	0	Minimal_Deviation
225	1	-3.68087976880318	0.00515795421228654	0	Minimal_Deviation
270	1	-3.68087976880318	0.0508200887419152	0	Minimal_Deviation
315	1	-3.68087976880318	0.33967872080573	0	Minimal_Deviation
0	1	-2.352966649261	0.302622783081077	0.00717201252375081	Minimal_Deviation
45	1	-2.352966649261	0.16527363373316	0.00343549869978939	Minimal_Deviation
90	1	-2.352966649261	0.0332385683859348	0.00107580187856262	Minimal_Deviation
135	1	-2.352966649261	0.0019560034155684	0	Minimal_Deviation
180	1	-2.352966649261	0.00408163314359802	0.0102040828589951	Minimal_Deviation
225	1	-2.352966649261	0.0343863614152436	0	Minimal_Deviation
270	1	-2.352966649261	0.17556030656298	0.0139026704306554	Minimal_Deviation
315	1	-2.352966649261	0.227520652615159	0.0128728429913476	Minimal_Deviation
0	1	-1.02505352971882	0.166792094965478	0.178275739876091	Minimal_Deviation
45	1	-1.02505352971882	0.249243302484685	0.133297349551828	Minimal_Deviation
90	1	-1.02505352971882	0.131915568281679	0.11080759349195	Minimal_Deviation
135	1	-1.02505352971882	0.00782401366227361	0.0686384011062089	Minimal_Deviation
180	1	-1.02505352971882	0.0265306154333871	0.0612244971539703	Minimal_Deviation
225	1	-1.02505352971882	0.115194310741066	0.0965021364751825	Minimal_Deviation
270	1	-1.02505352971882	0.272580475979363	0.127441145614341	Minimal_Deviation
315	1	-1.02505352971882	0.0817151639674161	0.185047118000622	Minimal_Deviation
0	1	0.302859589823361	0.0699128541771465	0.387288676282544	Minimal_Deviation
45	1	0.302859589823361	0.193929949259474	0.388898452816159	Minimal_Deviation
90	1	0.302859589823361	0.194237884005306	0.37760645937548	Minimal_Deviation
135	1	0.302859589823361	0.0606361058826205	0.339269811182118	Minimal_Deviation
180	1	0.302859589823361	0.0448979645795782	0.295918402910856	Minimal_Deviation
225	1	0.302859589823361	0.168493170934694	0.346373739848423	Minimal_Deviation
270	1	0.302859589823361	0.147840258158299	0.410128777704335	Minimal_Deviation
315	1	0.302859589823361	0.0224316136381142	0.423194713340552	Minimal_Deviation
0	1	1.63077270936554	0.0199751011934704	0.170079154134662	Minimal_Deviation
45	1	1.63077270936554	0.0833032428090525	0.210252520427111	Minimal_Deviation
90	1	1.63077270936554	0.165154136667613	0.236676413283777	Minimal_Deviation
135	1	1.63077270936554	0.133008232258651	0.300047867692856	Minimal_Deviation
180	1	1.63077270936554	0.10408164516175	0.328571468059641	Minimal_Deviation
225	1	1.63077270936554	0.190844305854602	0.267104127743809	Minimal_Deviation
270	1	1.63077270936554	0.071610125045426	0.18073471559852	Minimal_Deviation
315	1	1.63077270936554	0.00320451623401632	0.128728429913476	Minimal_Deviation
0	1	2.95868582890772	0.000998755059673521	0.0102457321767869	Minimal_Deviation
45	1	2.95868582890772	0.0279898895838416	0.017177493498947	Minimal_Deviation
90	1	2.95868582890772	0.126722041971376	0.0258192450855029	Minimal_Deviation
135	1	2.95868582890772	0.144744252752062	0.0451052350126516	Minimal_Deviation
180	1	2.95868582890772	0.167346958887519	0.0571428640103723	Minimal_Deviation
225	1	2.95868582890772	0.106597720387255	0.0430813109264208	Minimal_Deviation
270	1	2.95868582890772	0.0207900363035108	0.0185368939075405	Minimal_Deviation
315	1	2.95868582890772	0	0.0032182107478369	Minimal_Deviation
0	1	4.2865989484499	0	0	Minimal_Deviation
45	1	4.2865989484499	0.00399855565483452	0	Minimal_Deviation
90	1	4.2865989484499	0.0592061999374463	0.00107580187856262	Minimal_Deviation
135	1	4.2865989484499	0.150612262998767	0	Minimal_Deviation
180	1	4.2865989484499	0.138775526882333	0	Minimal_Deviation
225	1	4.2865989484499	0.0756499951135359	0	Minimal_Deviation
270	1	4.2865989484499	0.00231000403372342	0.00231711173844257	Minimal_Deviation
315	1	4.2865989484499	0	0	Minimal_Deviation
0	1	5.61451206799209	0	0	Minimal_Deviation
45	1	5.61451206799209	0.00133285188494484	0	Minimal_Deviation
90	1	5.61451206799209	0.0321998631238743	0	Minimal_Deviation
135	1	5.61451206799209	0.117360204934104	0	Minimal_Deviation
180	1	5.61451206799209	0.132653077166936	0	Minimal_Deviation
225	1	5.61451206799209	0.037824997556768	0	Minimal_Deviation
270	1	5.61451206799209	0.00693001210117026	0	Minimal_Deviation
315	1	5.61451206799209	0	0	Minimal_Deviation
0	1	6.94242518753427	0	0	Minimal_Deviation
45	1	6.94242518753427	0	0	Minimal_Deviation
90	1	6.94242518753427	0.00727093683442323	0	Minimal_Deviation
135	1	6.94242518753427	0.0821521434538729	0	Minimal_Deviation
180	1	6.94242518753427	0.0816326628719604	0	Minimal_Deviation
225	1	6.94242518753427	0.00687727228304872	0	Minimal_Deviation
270	1	6.94242518753427	0	0	Minimal_Deviation
315	1	6.94242518753427	0	0	Minimal_Deviation
0	1	8.27033830707645	0	0	Minimal_Deviation
45	1	8.27033830707645	0	0	Minimal_Deviation
90	1	8.27033830707645	0.00103870526206046	0	Minimal_Deviation
135	1	8.27033830707645	0.0449880785580732	0	Minimal_Deviation
180	1	8.27033830707645	0.0306122485769851	0	Minimal_Deviation
225	1	8.27033830707645	0.0103159084245731	0	Minimal_Deviation
270	1	8.27033830707645	0	0	Minimal_Deviation
315	1	8.27033830707645	0	0	Minimal_Deviation
0	1	9.59825142661863	0	0	Minimal_Deviation
45	1	9.59825142661863	0	0	Minimal_Deviation
90	1	9.59825142661863	0	0	Minimal_Deviation
135	1	9.59825142661863	0.00586801024670521	0	Minimal_Deviation
180	1	9.59825142661863	0.0163265325743921	0	Minimal_Deviation
225	1	9.59825142661863	0.00171931807076218	0	Minimal_Deviation
270	1	9.59825142661863	0	0	Minimal_Deviation
315	1	9.59825142661863	0	0	Minimal_Deviation
0	1	10.9261645461608	0	0	Minimal_Deviation
45	1	10.9261645461608	0	0	Minimal_Deviation
90	1	10.9261645461608	0	0	Minimal_Deviation
135	1	10.9261645461608	0.0019560034155684	0	Minimal_Deviation
180	1	10.9261645461608	0.00204081657179901	0	Minimal_Deviation
225	1	10.9261645461608	0	0	Minimal_Deviation
270	1	10.9261645461608	0	0	Minimal_Deviation
315	1	10.9261645461608	0	0	Minimal_Deviation
0	1	12.254077665703	0	0	Minimal_Deviation
45	1	12.254077665703	0	0	Minimal_Deviation
90	1	12.254077665703	0	0	Minimal_Deviation
135	1	12.254077665703	0	0	Minimal_Deviation
180	1	12.254077665703	0.00204081657179901	0	Minimal_Deviation
225	1	12.254077665703	0	0	Minimal_Deviation
270	1	12.254077665703	0	0	Minimal_Deviation
315	1	12.254077665703	0	0	Minimal_Deviation
0	1	13.5819907852452	0	0	Minimal_Deviation
45	1	13.5819907852452	0	0	Minimal_Deviation
90	1	13.5819907852452	0	0	Minimal_Deviation
135	1	13.5819907852452	0	0	Minimal_Deviation
180	1	13.5819907852452	0.00204081657179901	0	Minimal_Deviation
225	1	13.5819907852452	0	0	Minimal_Deviation
270	1	13.5819907852452	0	0	Minimal_Deviation
315	1	13.5819907852452	0	0	Minimal_Deviation
0	1	14.9099039047874	0	0	Minimal_Deviation
45	1	14.9099039047874	0	0	Minimal_Deviation
90	1	14.9099039047874	0	0	Minimal_Deviation
135	1	14.9099039047874	0	0	Minimal_Deviation
180	1	14.9099039047874	0	0	Minimal_Deviation
225	1	14.9099039047874	0	0	Minimal_Deviation
270	1	14.9099039047874	0	0	Minimal_Deviation
315	1	14.9099039047874	0	0	Minimal_Deviation
0	1	16.2378170243295	0	0	Minimal_Deviation
45	1	16.2378170243295	0	0	Minimal_Deviation
90	1	16.2378170243295	0	0	Minimal_Deviation
135	1	16.2378170243295	0	0	Minimal_Deviation
180	1	16.2378170243295	0	0	Minimal_Deviation
225	1	16.2378170243295	0	0	Minimal_Deviation
270	1	16.2378170243295	0	0	Minimal_Deviation
315	1	16.2378170243295	0	0	Minimal_Deviation
0	2	-11.6483584860563	0	0	Minimal_Deviation
45	2	-11.6483584860563	0	0	Minimal_Deviation
90	2	-11.6483584860563	0	0	Minimal_Deviation
135	2	-11.6483584860563	0	0	Minimal_Deviation
180	2	-11.6483584860563	0	0	Minimal_Deviation
225	2	-11.6483584860563	0	0	Minimal_Deviation
270	2	-11.6483584860563	0	0	Minimal_Deviation
315	2	-11.6483584860563	0	0	Minimal_Deviation
0	2	-10.3204453665141	0	0	Minimal_Deviation
45	2	-10.3204453665141	0	0	Minimal_Deviation
90	2	-10.3204453665141	0	0	Minimal_Deviation
135	2	-10.3204453665141	0	0	Minimal_Deviation
180	2	-10.3204453665141	0	0	Minimal_Deviation
225	2	-10.3204453665141	0	0	Minimal_Deviation
270	2	-10.3204453665141	0	0	Minimal_Deviation
315	2	-10.3204453665141	0	0	Minimal_Deviation
0	2	-8.9925322469719	0	0	Minimal_Deviation
45	2	-8.9925322469719	0	0	Minimal_Deviation
90	2	-8.9925322469719	0	0	Minimal_Deviation
135	2	-8.9925322469719	0	0	Minimal_Deviation
180	2	-8.9925322469719	0	0	Minimal_Deviation
225	2	-8.9925322469719	0	0	Minimal_Deviation
270	2	-8.9925322469719	0	0	Minimal_Deviation
315	2	-8.9925322469719	0	0	Minimal_Deviation
0	2	-7.66461912742972	0	0	Minimal_Deviation
45	2	-7.66461912742972	0	0	Minimal_Deviation
90	2	-7.66461912742972	0	0	Minimal_Deviation
135	2	-7.66461912742972	0	0	Minimal_Deviation
180	2	-7.66461912742972	0	0	Minimal_Deviation
225	2	-7.66461912742972	0	0	Minimal_Deviation
270	2	-7.66461912742972	0	0	Minimal_Deviation
315	2	-7.66461912742972	0	0	Minimal_Deviation
0	2	-6.33670600788754	0	0	Minimal_Deviation
45	2	-6.33670600788754	0	0	Minimal_Deviation
90	2	-6.33670600788754	0	0	Minimal_Deviation
135	2	-6.33670600788754	0	0	Minimal_Deviation
180	2	-6.33670600788754	0	0	Minimal_Deviation
225	2	-6.33670600788754	0	0	Minimal_Deviation
270	2	-6.33670600788754	0	0	Minimal_Deviation
315	2	-6.33670600788754	0	0	Minimal_Deviation
0	2	-5.00879288834536	0	0	Minimal_Deviation
45	2	-5.00879288834536	0.00466498159730694	0	Minimal_Deviation
90	2	-5.00879288834536	0.00934834735854415	0	Minimal_Deviation
135	2	-5.00879288834536	0.0019560034155684	0	Minimal_Deviation
180	2	-5.00879288834536	0	0	Minimal_Deviation
225	2	-5.00879288834536	0	0	Minimal_Deviation
270	2	-5.00879288834536	0	0	Minimal_Deviation
315	2	-5.00879288834536	0	0	Minimal_Deviation
0	2	-3.68087976880318	0.00599253035804113	0	Minimal_Deviation
45	2	-3.68087976880318	0.0499819456854315	0	Minimal_Deviation
90	2	-3.68087976880318	0.0716706630821718	0	Minimal_Deviation
135	2	-3.68087976880318	0.0567240990514837	0	Minimal_Deviation
180	2	-3.68087976880318	0.0122448994307941	0	Minimal_Deviation
225	2	-3.68087976880318	0	0	Minimal_Deviation
270	2	-3.68087976880318	0	0	Minimal_Deviation
315	2	-3.68087976880318	0	0	Minimal_Deviation
0	2	-2.352966649261	0.0759053845351876	0.0174177447005377	Minimal_Deviation
45	2	-2.352966649261	0.20659204216645	0.0185516929788627	Minimal_Deviation
90	2	-2.352966649261	0.184889536646762	0.0182886319355646	Minimal_Deviation
135	2	-2.352966649261	0.174084303985588	0.0156887773957049	Minimal_Deviation
180	2	-2.352966649261	0.0632653137257693	0.0183673491461911	Minimal_Deviation
225	2	-2.352966649261	0.00515795421228654	0.0137860194964546	Minimal_Deviation
270	2	-2.352966649261	0.00231000403372342	0.0139026704306554	Minimal_Deviation
315	2	-2.352966649261	0.00320451623401632	0.0128728429913476	Minimal_Deviation
0	2	-1.02505352971882	0.31760410897618	0.230528973977705	Minimal_Deviation
45	2	-1.02505352971882	0.279232469895944	0.250791405084626	Minimal_Deviation
90	2	-1.02505352971882	0.198392705053548	0.245282828312278	Minimal_Deviation
135	2	-1.02505352971882	0.211248368881387	0.227487272237721	Minimal_Deviation
180	2	-1.02505352971882	0.18571430803371	0.191836757749107	Minimal_Deviation
225	2	-1.02505352971882	0.085965903538109	0.153369466898058	Minimal_Deviation
270	2	-1.02505352971882	0.0231000403372342	0.118172698660571	Minimal_Deviation
315	2	-1.02505352971882	0.161828069817824	0.197919960991969	Minimal_Deviation
0	2	0.302859589823361	0.297629007782709	0.39036239593558	Minimal_Deviation
45	2	0.302859589823361	0.179268578525081	0.387524253336243	Minimal_Deviation
90	2	0.302859589823361	0.162038020881432	0.386212874403981	Minimal_Deviation
135	2	0.302859589823361	0.18386432106343	0.396141629241548	Minimal_Deviation
180	2	0.302859589823361	0.293877586339057	0.357142900064827	Minimal_Deviation
225	2	0.302859589823361	0.331828387657101	0.379115536152503	Minimal_Deviation
270	2	0.302859589823361	0.258720451777023	0.410128777704335	Minimal_Deviation
315	2	0.302859589823361	0.414984852305113	0.395839921983939	Minimal_Deviation
0	2	1.63077270936554	0.0519352631030231	0.104506468203226	Minimal_Deviation
45	2	1.63077270936554	0.0279898895838416	0.0941326643742293	Minimal_Deviation
90	2	1.63077270936554	0.0862125367510183	0.0989737728277611	Minimal_Deviation
135	2	1.63077270936554	0.109536191271831	0.11374363611886	Minimal_Deviation
180	2	1.63077270936554	0.177551041746514	0.161224509172122	Minimal_Deviation
225	2	1.63077270936554	0.287126117817284	0.17404849614274	Minimal_Deviation
270	2	1.63077270936554	0.318780556653832	0.18073471559852	Minimal_Deviation
315	2	1.63077270936554	0.153816779232783	0.138383062156987	Minimal_Deviation
0	2	2.95868582890772	0.00399502023869408	0.0102457321767869	Minimal_Deviation
45	2	2.95868582890772	0.00533140753977936	0.00206129921987364	Minimal_Deviation
90	2	2.95868582890772	0.0311611578618138	0.00430320751425048	Minimal_Deviation
135	2	2.95868582890772	0.0156480273245472	0	Minimal_Deviation
180	2	2.95868582890772	0.0183673491461911	0.0244897988615881	Minimal_Deviation
225	2	2.95868582890772	0.0429829517690545	0.0310185438670229	Minimal_Deviation
270	2	2.95868582890772	0.143220250090852	0.0301224525997534	Minimal_Deviation
315	2	2.95868582890772	0.0192270974040979	0.00804552686959225	Minimal_Deviation
0	2	4.2865989484499	0	0	Minimal_Deviation
45	2	4.2865989484499	0	0	Minimal_Deviation
90	2	4.2865989484499	0.00830964209648369	0	Minimal_Deviation
135	2	4.2865989484499	0	0	Minimal_Deviation
180	2	4.2865989484499	0.00204081657179901	0	Minimal_Deviation
225	2	4.2865989484499	0	0.00172325243705683	Minimal_Deviation
270	2	4.2865989484499	0.00693001210117026	0	Minimal_Deviation
315	2	4.2865989484499	0	0	Minimal_Deviation
0	2	5.61451206799209	0	0	Minimal_Deviation
45	2	5.61451206799209	0	0	Minimal_Deviation
90	2	5.61451206799209	0.00103870526206046	0	Minimal_Deviation
135	2	5.61451206799209	0	0	Minimal_Deviation
180	2	5.61451206799209	0	0	Minimal_Deviation
225	2	5.61451206799209	0	0	Minimal_Deviation
270	2	5.61451206799209	0	0	Minimal_Deviation
315	2	5.61451206799209	0	0	Minimal_Deviation
0	2	6.94242518753427	0	0	Minimal_Deviation
45	2	6.94242518753427	0	0	Minimal_Deviation
90	2	6.94242518753427	0	0	Minimal_Deviation
135	2	6.94242518753427	0	0	Minimal_Deviation
180	2	6.94242518753427	0	0	Minimal_Deviation
225	2	6.94242518753427	0	0	Minimal_Deviation
270	2	6.94242518753427	0	0	Minimal_Deviation
315	2	6.94242518753427	0	0	Minimal_Deviation
0	2	8.27033830707645	0	0	Minimal_Deviation
45	2	8.27033830707645	0	0	Minimal_Deviation
90	2	8.27033830707645	0	0	Minimal_Deviation
135	2	8.27033830707645	0	0	Minimal_Deviation
180	2	8.27033830707645	0	0	Minimal_Deviation
225	2	8.27033830707645	0	0	Minimal_Deviation
270	2	8.27033830707645	0	0	Minimal_Deviation
315	2	8.27033830707645	0	0	Minimal_Deviation
0	2	9.59825142661863	0	0	Minimal_Deviation
45	2	9.59825142661863	0	0	Minimal_Deviation
90	2	9.59825142661863	0	0	Minimal_Deviation
135	2	9.59825142661863	0	0	Minimal_Deviation
180	2	9.59825142661863	0	0	Minimal_Deviation
225	2	9.59825142661863	0	0	Minimal_Deviation
270	2	9.59825142661863	0	0	Minimal_Deviation
315	2	9.59825142661863	0	0	Minimal_Deviation
0	2	10.9261645461608	0	0	Minimal_Deviation
45	2	10.9261645461608	0	0	Minimal_Deviation
90	2	10.9261645461608	0	0	Minimal_Deviation
135	2	10.9261645461608	0	0	Minimal_Deviation
180	2	10.9261645461608	0	0	Minimal_Deviation
225	2	10.9261645461608	0	0	Minimal_Deviation
270	2	10.9261645461608	0	0	Minimal_Deviation
315	2	10.9261645461608	0	0	Minimal_Deviation
0	2	12.254077665703	0	0	Minimal_Deviation
45	2	12.254077665703	0	0	Minimal_Deviation
90	2	12.254077665703	0	0	Minimal_Deviation
135	2	12.254077665703	0	0	Minimal_Deviation
180	2	12.254077665703	0	0	Minimal_Deviation
225	2	12.254077665703	0	0	Minimal_Deviation
270	2	12.254077665703	0	0	Minimal_Deviation
315	2	12.254077665703	0	0	Minimal_Deviation
0	2	13.5819907852452	0	0	Minimal_Deviation
45	2	13.5819907852452	0	0	Minimal_Deviation
90	2	13.5819907852452	0	0	Minimal_Deviation
135	2	13.5819907852452	0	0	Minimal_Deviation
180	2	13.5819907852452	0	0	Minimal_Deviation
225	2	13.5819907852452	0	0	Minimal_Deviation
270	2	13.5819907852452	0	0	Minimal_Deviation
315	2	13.5819907852452	0	0	Minimal_Deviation
0	2	14.9099039047874	0	0	Minimal_Deviation
45	2	14.9099039047874	0	0	Minimal_Deviation
90	2	14.9099039047874	0	0	Minimal_Deviation
135	2	14.9099039047874	0	0	Minimal_Deviation
180	2	14.9099039047874	0	0	Minimal_Deviation
225	2	14.9099039047874	0	0	Minimal_Deviation
270	2	14.9099039047874	0	0	Minimal_Deviation
315	2	14.9099039047874	0	0	Minimal_Deviation
0	2	16.2378170243295	0	0	Minimal_Deviation
45	2	16.2378170243295	0	0	Minimal_Deviation
90	2	16.2378170243295	0	0	Minimal_Deviation
135	2	16.2378170243295	0	0	Minimal_Deviation
180	2	16.2378170243295	0	0	Minimal_Deviation
225	2	16.2378170243295	0	0	Minimal_Deviation
270	2	16.2378170243295	0	0	Minimal_Deviation
315	2	16.2378170243295	0	0	Minimal_Deviation
0	3	-11.6483584860563	0	0	Minimal_Deviation
45	3	-11.6483584860563	0	0	Minimal_Deviation
90	3	-11.6483584860563	0	0	Minimal_Deviation
135	3	-11.6483584860563	0	0	Minimal_Deviation
180	3	-11.6483584860563	0	0	Minimal_Deviation
225	3	-11.6483584860563	0	0	Minimal_Deviation
270	3	-11.6483584860563	0	0	Minimal_Deviation
315	3	-11.6483584860563	0	0	Minimal_Deviation
0	3	-10.3204453665141	0	0	Minimal_Deviation
45	3	-10.3204453665141	0	0	Minimal_Deviation
90	3	-10.3204453665141	0	0	Minimal_Deviation
135	3	-10.3204453665141	0	0	Minimal_Deviation
180	3	-10.3204453665141	0	0	Minimal_Deviation
225	3	-10.3204453665141	0	0	Minimal_Deviation
270	3	-10.3204453665141	0	0	Minimal_Deviation
315	3	-10.3204453665141	0	0	Minimal_Deviation
0	3	-8.9925322469719	0	0	Minimal_Deviation
45	3	-8.9925322469719	0	0	Minimal_Deviation
90	3	-8.9925322469719	0	0	Minimal_Deviation
135	3	-8.9925322469719	0	0	Minimal_Deviation
180	3	-8.9925322469719	0	0	Minimal_Deviation
225	3	-8.9925322469719	0	0	Minimal_Deviation
270	3	-8.9925322469719	0	0	Minimal_Deviation
315	3	-8.9925322469719	0	0	Minimal_Deviation
0	3	-7.66461912742972	0	0	Minimal_Deviation
45	3	-7.66461912742972	0.00066642594247242	0	Minimal_Deviation
90	3	-7.66461912742972	0	0	Minimal_Deviation
135	3	-7.66461912742972	0	0	Minimal_Deviation
180	3	-7.66461912742972	0	0	Minimal_Deviation
225	3	-7.66461912742972	0	0	Minimal_Deviation
270	3	-7.66461912742972	0	0	Minimal_Deviation
315	3	-7.66461912742972	0	0	Minimal_Deviation
0	3	-6.33670600788754	0.000998755059673521	0	Minimal_Deviation
45	3	-6.33670600788754	0.00199927782741726	0	Minimal_Deviation
90	3	-6.33670600788754	0.00207741052412092	0	Minimal_Deviation
135	3	-6.33670600788754	0.0019560034155684	0	Minimal_Deviation
180	3	-6.33670600788754	0	0	Minimal_Deviation
225	3	-6.33670600788754	0	0	Minimal_Deviation
270	3	-6.33670600788754	0	0	Minimal_Deviation
315	3	-6.33670600788754	0	0	Minimal_Deviation
0	3	-5.00879288834536	0.00199751011934704	0	Minimal_Deviation
45	3	-5.00879288834536	0.00266570376988968	0	Minimal_Deviation
90	3	-5.00879288834536	0.00103870526206046	0	Minimal_Deviation
135	3	-5.00879288834536	0.0039120068311368	0	Minimal_Deviation
180	3	-5.00879288834536	0.00408163314359802	0	Minimal_Deviation
225	3	-5.00879288834536	0	0.00172325243705683	Minimal_Deviation
270	3	-5.00879288834536	0	0	Minimal_Deviation
315	3	-5.00879288834536	0.00160225811700816	0	Minimal_Deviation
0	3	-3.68087976880318	0.00399502023869408	0.00204914643535737	Minimal_Deviation
45	3	-3.68087976880318	0.0173270745042829	0.00480969817970515	Minimal_Deviation
90	3	-3.68087976880318	0.0311611578618139	0.00430320751425048	Minimal_Deviation
135	3	-3.68087976880318	0.0117360204934104	0	Minimal_Deviation
180	3	-3.68087976880318	0.0142857160025931	0.00816326628719604	Minimal_Deviation
225	3	-3.68087976880318	0	0.00344650487411366	Minimal_Deviation
270	3	-3.68087976880318	0	0.00231711173844257	Minimal_Deviation
315	3	-3.68087976880318	0	0.0032182107478369	Minimal_Deviation
0	3	-2.352966649261	0.0329589169692262	0.0676218323667933	Minimal_Deviation
45	3	-2.352966649261	0.0699747239596041	0.0611518768562512	Minimal_Deviation
90	3	-2.352966649261	0.124644631447255	0.0570174995638189	Minimal_Deviation
135	3	-2.352966649261	0.0743281297915993	0.0294164576169467	Minimal_Deviation
180	3	-2.352966649261	0.0489795977231762	0.0244897988615881	Minimal_Deviation
225	3	-2.352966649261	0.0223511349199083	0.0534208255487617	Minimal_Deviation
270	3	-2.352966649261	0.0323400564721279	0.0347566760766385	Minimal_Deviation
315	3	-2.352966649261	0.0144203230530734	0.0531004773393089	Minimal_Deviation
0	3	-1.02505352971882	0.203746032173398	0.262290743725744	Minimal_Deviation
45	3	-1.02505352971882	0.268569654816385	0.257662402484204	Minimal_Deviation
90	3	-1.02505352971882	0.279411715494264	0.247434432069403	Minimal_Deviation
135	3	-1.02505352971882	0.185820324478998	0.243176049633426	Minimal_Deviation
180	3	-1.02505352971882	0.120408177736142	0.234693905756886	Minimal_Deviation
225	3	-1.02505352971882	0.187405669713078	0.201620535135649	Minimal_Deviation
270	3	-1.02505352971882	0.18942033076532	0.220125615152044	Minimal_Deviation
315	3	-1.02505352971882	0.161828069817824	0.267111492070463	Minimal_Deviation
0	3	0.302859589823361	0.398503268809735	0.328888002874858	Minimal_Deviation
45	3	0.302859589823361	0.308555211364731	0.357291864778097	Minimal_Deviation
90	3	0.302859589823361	0.251366673418632	0.339953393625788	Minimal_Deviation
135	3	0.302859589823361	0.254280444023892	0.311814450739635	Minimal_Deviation
180	3	0.302859589823361	0.265306154333871	0.340816367490435	Minimal_Deviation
225	3	0.302859589823361	0.309477252737192	0.317078448418457	Minimal_Deviation
270	3	0.302859589823361	0.339570592957343	0.361469431197041	Minimal_Deviation
315	3	0.302859589823361	0.384541948081958	0.334693917775038	Minimal_Deviation
0	3	1.63077270936554	0.10786554644474	0.0911870163734031	Minimal_Deviation
45	3	1.63077270936554	0.0826368168665801	0.0700841734757036	Minimal_Deviation
90	3	1.63077270936554	0.0592061999374463	0.0989737728277611	Minimal_Deviation
135	3	1.63077270936554	0.189732331310135	0.160809968305975	Minimal_Deviation
180	3	1.63077270936554	0.228571456041489	0.134693893738735	Minimal_Deviation
225	3	1.63077270936554	0.185686351642315	0.167155486394513	Minimal_Deviation
270	3	1.63077270936554	0.173250302529256	0.129758257352784	Minimal_Deviation
315	3	1.63077270936554	0.181055167221922	0.0901099009394332	Minimal_Deviation
0	3	2.95868582890772	0.00299626517902056	0.00102457321767869	Minimal_Deviation
45	3	2.95868582890772	0.00066642594247242	0.00206129921987364	Minimal_Deviation
90	3	2.95868582890772	0.00415482104824185	0.00537900939281311	Minimal_Deviation
135	3	2.95868582890772	0.0273840478179576	0.00784438869785244	Minimal_Deviation
180	3	2.95868582890772	0.0612244971539703	0.0102040828589951	Minimal_Deviation
225	3	2.95868582890772	0.0343863614152436	0.00861626218528415	Minimal_Deviation
270	3	2.95868582890772	0.0184800322697874	0.00463422347688514	Minimal_Deviation
315	3	2.95868582890772	0.00961354870204895	0.00482731612175535	Minimal_Deviation
0	3	4.2865989484499	0	0	Minimal_Deviation
45	3	4.2865989484499	0	0	Minimal_Deviation
90	3	4.2865989484499	0	0	Minimal_Deviation
135	3	4.2865989484499	0.0039120068311368	0	Minimal_Deviation
180	3	4.2865989484499	0.0102040828589951	0	Minimal_Deviation
225	3	4.2865989484499	0.0137545445660974	0	Minimal_Deviation
270	3	4.2865989484499	0	0	Minimal_Deviation
315	3	4.2865989484499	0	0	Minimal_Deviation
0	3	5.61451206799209	0	0	Minimal_Deviation
45	3	5.61451206799209	0	0	Minimal_Deviation
90	3	5.61451206799209	0	0	Minimal_Deviation
135	3	5.61451206799209	0	0	Minimal_Deviation
180	3	5.61451206799209	0	0	Minimal_Deviation
225	3	5.61451206799209	0	0	Minimal_Deviation
270	3	5.61451206799209	0	0	Minimal_Deviation
315	3	5.61451206799209	0	0	Minimal_Deviation
0	3	6.94242518753427	0	0	Minimal_Deviation
45	3	6.94242518753427	0	0	Minimal_Deviation
90	3	6.94242518753427	0	0	Minimal_Deviation
135	3	6.94242518753427	0	0	Minimal_Deviation
180	3	6.94242518753427	0	0	Minimal_Deviation
225	3	6.94242518753427	0	0	Minimal_Deviation
270	3	6.94242518753427	0	0	Minimal_Deviation
315	3	6.94242518753427	0	0	Minimal_Deviation
0	3	8.27033830707645	0	0	Minimal_Deviation
45	3	8.27033830707645	0	0	Minimal_Deviation
90	3	8.27033830707645	0	0	Minimal_Deviation
135	3	8.27033830707645	0	0	Minimal_Deviation
180	3	8.27033830707645	0	0	Minimal_Deviation
225	3	8.27033830707645	0	0	Minimal_Deviation
270	3	8.27033830707645	0	0	Minimal_Deviation
315	3	8.27033830707645	0	0	Minimal_Deviation
0	3	9.59825142661863	0	0	Minimal_Deviation
45	3	9.59825142661863	0	0	Minimal_Deviation
90	3	9.59825142661863	0	0	Minimal_Deviation
135	3	9.59825142661863	0	0	Minimal_Deviation
180	3	9.59825142661863	0	0	Minimal_Deviation
225	3	9.59825142661863	0	0	Minimal_Deviation
270	3	9.59825142661863	0	0	Minimal_Deviation
315	3	9.59825142661863	0	0	Minimal_Deviation
0	3	10.9261645461608	0	0	Minimal_Deviation
45	3	10.9261645461608	0	0	Minimal_Deviation
90	3	10.9261645461608	0	0	Minimal_Deviation
135	3	10.9261645461608	0	0	Minimal_Deviation
180	3	10.9261645461608	0	0	Minimal_Deviation
225	3	10.9261645461608	0	0	Minimal_Deviation
270	3	10.9261645461608	0	0	Minimal_Deviation
315	3	10.9261645461608	0	0	Minimal_Deviation
0	3	12.254077665703	0	0	Minimal_Deviation
45	3	12.254077665703	0	0	Minimal_Deviation
90	3	12.254077665703	0	0	Minimal_Deviation
135	3	12.254077665703	0	0	Minimal_Deviation
180	3	12.254077665703	0	0	Minimal_Deviation
225	3	12.254077665703	0	0	Minimal_Deviation
270	3	12.254077665703	0	0	Minimal_Deviation
315	3	12.254077665703	0	0	Minimal_Deviation
0	3	13.5819907852452	0	0	Minimal_Deviation
45	3	13.5819907852452	0	0	Minimal_Deviation
90	3	13.5819907852452	0	0	Minimal_Deviation
135	3	13.5819907852452	0	0	Minimal_Deviation
180	3	13.5819907852452	0	0	Minimal_Deviation
225	3	13.5819907852452	0	0	Minimal_Deviation
270	3	13.5819907852452	0	0	Minimal_Deviation
315	3	13.5819907852452	0	0	Minimal_Deviation
0	3	14.9099039047874	0	0	Minimal_Deviation
45	3	14.9099039047874	0	0	Minimal_Deviation
90	3	14.9099039047874	0	0	Minimal_Deviation
135	3	14.9099039047874	0	0	Minimal_Deviation
180	3	14.9099039047874	0	0	Minimal_Deviation
225	3	14.9099039047874	0	0	Minimal_Deviation
270	3	14.9099039047874	0	0	Minimal_Deviation
315	3	14.9099039047874	0	0	Minimal_Deviation
0	3	16.2378170243295	0	0	Minimal_Deviation
45	3	16.2378170243295	0	0	Minimal_Deviation
90	3	16.2378170243295	0	0	Minimal_Deviation
135	3	16.2378170243295	0	0	Minimal_Deviation
180	3	16.2378170243295	0	0	Minimal_Deviation
225	3	16.2378170243295	0	0	Minimal_Deviation
270	3	16.2378170243295	0	0	Minimal_Deviation
315	3	16.2378170243295	0	0	Minimal_Deviation
