# Supplementary material for: Constraints on neural redundancy
Source: eLife journal article supplement (doi:10.7554/elife.36774), 2018-08-15
Supplement: supp [file elife-36774-supp-v1.zip › elife_poa_e36774_Figure_3_source_data_1.csv]

target	dimension	bin_center	data	predicted	hypothesisName
0	1	-11.6483584860563	0	0	Uncontrolled_uniform
45	1	-11.6483584860563	0	0	Uncontrolled_uniform
90	1	-11.6483584860563	0	0	Uncontrolled_uniform
135	1	-11.6483584860563	0	0	Uncontrolled_uniform
180	1	-11.6483584860563	0	0	Uncontrolled_uniform
225	1	-11.6483584860563	0	0	Uncontrolled_uniform
270	1	-11.6483584860563	0	0	Uncontrolled_uniform
315	1	-11.6483584860563	0	0	Uncontrolled_uniform
0	1	-10.3204453665141	0	0	Uncontrolled_uniform
45	1	-10.3204453665141	0	0	Uncontrolled_uniform
90	1	-10.3204453665141	0	0	Uncontrolled_uniform
135	1	-10.3204453665141	0	0	Uncontrolled_uniform
180	1	-10.3204453665141	0	0	Uncontrolled_uniform
225	1	-10.3204453665141	0	0	Uncontrolled_uniform
270	1	-10.3204453665141	0	0	Uncontrolled_uniform
315	1	-10.3204453665141	0	0	Uncontrolled_uniform
0	1	-8.9925322469719	0	0	Uncontrolled_uniform
45	1	-8.9925322469719	0	0	Uncontrolled_uniform
90	1	-8.9925322469719	0	0	Uncontrolled_uniform
135	1	-8.9925322469719	0	0	Uncontrolled_uniform
180	1	-8.9925322469719	0	0	Uncontrolled_uniform
225	1	-8.9925322469719	0	0	Uncontrolled_uniform
270	1	-8.9925322469719	0	0	Uncontrolled_uniform
315	1	-8.9925322469719	0	0	Uncontrolled_uniform
0	1	-7.66461912742972	0	0	Uncontrolled_uniform
45	1	-7.66461912742972	0	0	Uncontrolled_uniform
90	1	-7.66461912742972	0	0	Uncontrolled_uniform
135	1	-7.66461912742972	0	0	Uncontrolled_uniform
180	1	-7.66461912742972	0	0	Uncontrolled_uniform
225	1	-7.66461912742972	0	0	Uncontrolled_uniform
270	1	-7.66461912742972	0	0	Uncontrolled_uniform
315	1	-7.66461912742972	0	0	Uncontrolled_uniform
0	1	-6.33670600788754	0	0	Uncontrolled_uniform
45	1	-6.33670600788754	0	0	Uncontrolled_uniform
90	1	-6.33670600788754	0	0	Uncontrolled_uniform
135	1	-6.33670600788754	0	0	Uncontrolled_uniform
180	1	-6.33670600788754	0	0	Uncontrolled_uniform
225	1	-6.33670600788754	0	0	Uncontrolled_uniform
270	1	-6.33670600788754	0	0	Uncontrolled_uniform
315	1	-6.33670600788754	0.00160225811700816	0	Uncontrolled_uniform
0	1	-5.00879288834536	0.0129838157757558	0.00120876615568834	Uncontrolled_uniform
45	1	-5.00879288834536	0.00066642594247242	0	Uncontrolled_uniform
90	1	-5.00879288834536	0	0	Uncontrolled_uniform
135	1	-5.00879288834536	0	0	Uncontrolled_uniform
180	1	-5.00879288834536	0	0	Uncontrolled_uniform
225	1	-5.00879288834536	0	0	Uncontrolled_uniform
270	1	-5.00879288834536	0.00462000806744684	0	Uncontrolled_uniform
315	1	-5.00879288834536	0.0769083896163916	0	Uncontrolled_uniform
0	1	-3.68087976880318	0.179775910741234	0.00241753231137668	Uncontrolled_uniform
45	1	-3.68087976880318	0.0273234636413692	0.000729004177147952	Uncontrolled_uniform
90	1	-3.68087976880318	0.00207741052412092	0	Uncontrolled_uniform
135	1	-3.68087976880318	0.0019560034155684	0.00195854698307889	Uncontrolled_uniform
180	1	-3.68087976880318	0	0.00204081657179901	Uncontrolled_uniform
225	1	-3.68087976880318	0.00515795421228654	0.00171931807076218	Uncontrolled_uniform
270	1	-3.68087976880318	0.0508200887419152	0.00236811734274791	Uncontrolled_uniform
315	1	-3.68087976880318	0.33967872080573	0.00805413171116401	Uncontrolled_uniform
0	1	-2.352966649261	0.302622783081077	0.00846136308981837	Uncontrolled_uniform
45	1	-2.352966649261	0.16527363373316	0.00656103759433157	Uncontrolled_uniform
90	1	-2.352966649261	0.0332385683859348	0.00846136308981837	Uncontrolled_uniform
135	1	-2.352966649261	0.0019560034155684	0	Uncontrolled_uniform
180	1	-2.352966649261	0.00408163314359802	0.00816326628719604	Uncontrolled_uniform
225	1	-2.352966649261	0.0343863614152436	0.00515795421228654	Uncontrolled_uniform
270	1	-2.352966649261	0.17556030656298	0.00947246937099163	Uncontrolled_uniform
315	1	-2.352966649261	0.227520652615159	0.012081197566746	Uncontrolled_uniform
0	1	-1.02505352971882	0.166792094965478	0.0265928554251434	Uncontrolled_uniform
45	1	-1.02505352971882	0.249243302484685	0.0138510793658111	Uncontrolled_uniform
90	1	-1.02505352971882	0.131915568281679	0.010576703862273	Uncontrolled_uniform
135	1	-1.02505352971882	0.00782401366227361	0.00587564094923668	Uncontrolled_uniform
180	1	-1.02505352971882	0.0265306154333871	0.0102040828589951	Uncontrolled_uniform
225	1	-1.02505352971882	0.115194310741066	0.0137545445660974	Uncontrolled_uniform
270	1	-1.02505352971882	0.272580475979363	0.0355217601412186	Uncontrolled_uniform
315	1	-1.02505352971882	0.0817151639674161	0.030202993916865	Uncontrolled_uniform
0	1	0.302859589823361	0.0699128541771465	0.0519769446945985	Uncontrolled_uniform
45	1	0.302859589823361	0.193929949259474	0.0342631963259538	Uncontrolled_uniform
90	1	0.302859589823361	0.194237884005306	0.0264417596556824	Uncontrolled_uniform
135	1	0.302859589823361	0.0606361058826205	0.0293782047461834	Uncontrolled_uniform
180	1	0.302859589823361	0.0448979645795782	0.0102040828589951	Uncontrolled_uniform
225	1	0.302859589823361	0.168493170934694	0.0275090891321949	Uncontrolled_uniform
270	1	0.302859589823361	0.147840258158299	0.0378898774839665	Uncontrolled_uniform
315	1	0.302859589823361	0.0224316136381142	0.0624195207615211	Uncontrolled_uniform
0	1	1.63077270936554	0.0199751011934704	0.0688996708742353	Uncontrolled_uniform
45	1	1.63077270936554	0.0833032428090525	0.0597783425261321	Uncontrolled_uniform
90	1	1.63077270936554	0.165154136667613	0.0624025527874105	Uncontrolled_uniform
135	1	1.63077270936554	0.133008232258651	0.0391709396615779	Uncontrolled_uniform
180	1	1.63077270936554	0.10408164516175	0.0367346982923822	Uncontrolled_uniform
225	1	1.63077270936554	0.190844305854602	0.0756499951135359	Uncontrolled_uniform
270	1	1.63077270936554	0.071610125045426	0.0639391682541935	Uncontrolled_uniform
315	1	1.63077270936554	0.00320451623401632	0.0865819158950131	Uncontrolled_uniform
0	1	2.95868582890772	0.000998755059673521	0.0979100586107554	Uncontrolled_uniform
45	1	2.95868582890772	0.0279898895838416	0.091854526320642	Uncontrolled_uniform
90	1	2.95868582890772	0.126722041971376	0.075094597422138	Uncontrolled_uniform
135	1	2.95868582890772	0.144744252752062	0.0567978625092879	Uncontrolled_uniform
180	1	2.95868582890772	0.167346958887519	0.0897959291591565	Uncontrolled_uniform
225	1	2.95868582890772	0.106597720387255	0.0550181782643897	Uncontrolled_uniform
270	1	2.95868582890772	0.0207900363035108	0.0828841069961768	Uncontrolled_uniform
315	1	2.95868582890772	0	0.104703712245132	Uncontrolled_uniform
0	1	4.2865989484499	0	0.114832784790392	Uncontrolled_uniform
45	1	4.2865989484499	0.00399855565483452	0.0896675137891981	Uncontrolled_uniform
90	1	4.2865989484499	0.0592061999374463	0.102594027464048	Uncontrolled_uniform
135	1	4.2865989484499	0.150612262998767	0.107720084069339	Uncontrolled_uniform
180	1	4.2865989484499	0.138775526882333	0.112244911448946	Uncontrolled_uniform
225	1	4.2865989484499	0.0756499951135359	0.110036356528779	Uncontrolled_uniform
270	1	4.2865989484499	0.00231000403372342	0.10182904573816	Uncontrolled_uniform
315	1	4.2865989484499	0	0.128866107378624	Uncontrolled_uniform
0	1	5.61451206799209	0	0.11604155094608	Uncontrolled_uniform
45	1	5.61451206799209	0.00133285188494484	0.125388718469448	Uncontrolled_uniform
90	1	5.61451206799209	0.0321998631238743	0.120574424029912	Uncontrolled_uniform
135	1	5.61451206799209	0.117360204934104	0.131222647866286	Uncontrolled_uniform
180	1	5.61451206799209	0.132653077166936	0.114285728020745	Uncontrolled_uniform
225	1	5.61451206799209	0.037824997556768	0.132387491448688	Uncontrolled_uniform
270	1	5.61451206799209	0.00693001210117026	0.116037749794647	Uncontrolled_uniform
315	1	5.61451206799209	0	0.104703712245132	Uncontrolled_uniform
0	1	6.94242518753427	0	0.100327590922132	Uncontrolled_uniform
45	1	6.94242518753427	0	0.11736967252082	Uncontrolled_uniform
90	1	6.94242518753427	0.00727093683442323	0.109997720167639	Uncontrolled_uniform
135	1	6.94242518753427	0.0821521434538729	0.0783418793231558	Uncontrolled_uniform
180	1	6.94242518753427	0.0816326628719604	0.134693893738735	Uncontrolled_uniform
225	1	6.94242518753427	0.00687727228304872	0.123790901094877	Uncontrolled_uniform
270	1	6.94242518753427	0	0.0947246937099163	Uncontrolled_uniform
315	1	6.94242518753427	0	0.0543653890503571	Uncontrolled_uniform
0	1	8.27033830707645	0	0.0688996708742353	Uncontrolled_uniform
45	1	8.27033830707645	0	0.101331580623565	Uncontrolled_uniform
90	1	8.27033830707645	0.00103870526206046	0.103651697850275	Uncontrolled_uniform
135	1	8.27033830707645	0.0449880785580732	0.127305553900128	Uncontrolled_uniform
180	1	8.27033830707645	0.0306122485769851	0.0938775623027545	Uncontrolled_uniform
225	1	8.27033830707645	0.0103159084245731	0.0756499951135359	Uncontrolled_uniform
270	1	8.27033830707645	0	0.0947246937099163	Uncontrolled_uniform
315	1	8.27033830707645	0	0.0825548500394311	Uncontrolled_uniform
0	1	9.59825142661863	0	0.0616470739401053	Uncontrolled_uniform
45	1	9.59825142661863	0	0.0634233634118718	Uncontrolled_uniform
90	1	9.59825142661863	0	0.0666332343323196	Uncontrolled_uniform
135	1	9.59825142661863	0.00586801024670521	0.0940102551877869	Uncontrolled_uniform
180	1	9.59825142661863	0.0163265325743921	0.0673469468693673	Uncontrolled_uniform
225	1	9.59825142661863	0.00171931807076218	0.0687727228304872	Uncontrolled_uniform
270	1	9.59825142661863	0	0.0710435202824372	Uncontrolled_uniform
315	1	9.59825142661863	0	0.044297724411402	Uncontrolled_uniform
0	1	10.9261645461608	0	0.0229665569580784	Uncontrolled_uniform
45	1	10.9261645461608	0	0.0335341921488058	Uncontrolled_uniform
90	1	10.9261645461608	0	0.0454798266077737	Uncontrolled_uniform
135	1	10.9261645461608	0.0019560034155684	0.0450465806108146	Uncontrolled_uniform
180	1	10.9261645461608	0.00204081657179901	0.0448979645795782	Uncontrolled_uniform
225	1	10.9261645461608	0	0.0464215879105788	Uncontrolled_uniform
270	1	10.9261645461608	0	0.026049290770227	Uncontrolled_uniform
315	1	10.9261645461608	0	0.030202993916865	Uncontrolled_uniform
0	1	12.254077665703	0	0.010878895401195	Uncontrolled_uniform
45	1	12.254077665703	0	0.0131220751886631	Uncontrolled_uniform
90	1	12.254077665703	0	0.0148073854071821	Uncontrolled_uniform
135	1	12.254077665703	0	0.0274196577631045	Uncontrolled_uniform
180	1	12.254077665703	0.00204081657179901	0.0204081657179901	Uncontrolled_uniform
225	1	12.254077665703	0	0.0120352264953353	Uncontrolled_uniform
270	1	12.254077665703	0	0.0142087040564874	Uncontrolled_uniform
315	1	12.254077665703	0	0	Uncontrolled_uniform
0	1	13.5819907852452	0	0	Uncontrolled_uniform
45	1	13.5819907852452	0	0.0014580083542959	Uncontrolled_uniform
90	1	13.5819907852452	0	0.00423068154490918	Uncontrolled_uniform
135	1	13.5819907852452	0	0.00391709396615779	Uncontrolled_uniform
180	1	13.5819907852452	0.00204081657179901	0.00816326628719604	Uncontrolled_uniform
225	1	13.5819907852452	0	0.00515795421228654	Uncontrolled_uniform
270	1	13.5819907852452	0	0.00236811734274791	Uncontrolled_uniform
315	1	13.5819907852452	0	0.004027065855582	Uncontrolled_uniform
0	1	14.9099039047874	0	0	Uncontrolled_uniform
45	1	14.9099039047874	0	0.000729004177147952	Uncontrolled_uniform
90	1	14.9099039047874	0	0.00211534077245459	Uncontrolled_uniform
135	1	14.9099039047874	0	0.00391709396615779	Uncontrolled_uniform
180	1	14.9099039047874	0	0	Uncontrolled_uniform
225	1	14.9099039047874	0	0	Uncontrolled_uniform
270	1	14.9099039047874	0	0	Uncontrolled_uniform
315	1	14.9099039047874	0	0	Uncontrolled_uniform
0	1	16.2378170243295	0	0	Uncontrolled_uniform
45	1	16.2378170243295	0	0	Uncontrolled_uniform
90	1	16.2378170243295	0	0	Uncontrolled_uniform
135	1	16.2378170243295	0	0.00195854698307889	Uncontrolled_uniform
180	1	16.2378170243295	0	0	Uncontrolled_uniform
225	1	16.2378170243295	0	0	Uncontrolled_uniform
270	1	16.2378170243295	0	0	Uncontrolled_uniform
315	1	16.2378170243295	0	0	Uncontrolled_uniform
0	2	-11.6483584860563	0	0	Uncontrolled_uniform
45	2	-11.6483584860563	0	0	Uncontrolled_uniform
90	2	-11.6483584860563	0	0	Uncontrolled_uniform
135	2	-11.6483584860563	0	0	Uncontrolled_uniform
180	2	-11.6483584860563	0	0	Uncontrolled_uniform
225	2	-11.6483584860563	0	0	Uncontrolled_uniform
270	2	-11.6483584860563	0	0	Uncontrolled_uniform
315	2	-11.6483584860563	0	0	Uncontrolled_uniform
0	2	-10.3204453665141	0	0	Uncontrolled_uniform
45	2	-10.3204453665141	0	0	Uncontrolled_uniform
90	2	-10.3204453665141	0	0	Uncontrolled_uniform
135	2	-10.3204453665141	0	0	Uncontrolled_uniform
180	2	-10.3204453665141	0	0	Uncontrolled_uniform
225	2	-10.3204453665141	0	0	Uncontrolled_uniform
270	2	-10.3204453665141	0	0	Uncontrolled_uniform
315	2	-10.3204453665141	0	0	Uncontrolled_uniform
0	2	-8.9925322469719	0	0	Uncontrolled_uniform
45	2	-8.9925322469719	0	0	Uncontrolled_uniform
90	2	-8.9925322469719	0	0	Uncontrolled_uniform
135	2	-8.9925322469719	0	0	Uncontrolled_uniform
180	2	-8.9925322469719	0	0	Uncontrolled_uniform
225	2	-8.9925322469719	0	0	Uncontrolled_uniform
270	2	-8.9925322469719	0	0	Uncontrolled_uniform
315	2	-8.9925322469719	0	0	Uncontrolled_uniform
0	2	-7.66461912742972	0	0	Uncontrolled_uniform
45	2	-7.66461912742972	0	0.000729004177147952	Uncontrolled_uniform
90	2	-7.66461912742972	0	0.00317301115868189	Uncontrolled_uniform
135	2	-7.66461912742972	0	0.00586801024670521	Uncontrolled_uniform
180	2	-7.66461912742972	0	0.00612244971539703	Uncontrolled_uniform
225	2	-7.66461912742972	0	0.00343863614152436	Uncontrolled_uniform
270	2	-7.66461912742972	0	0.00473623468549582	Uncontrolled_uniform
315	2	-7.66461912742972	0	0	Uncontrolled_uniform
0	2	-6.33670600788754	0	0.00967012924550671	Uncontrolled_uniform
45	2	-6.33670600788754	0	0.00437402506288771	Uncontrolled_uniform
90	2	-6.33670600788754	0	0.00740369270359107	Uncontrolled_uniform
135	2	-6.33670600788754	0	0.00978001707784201	Uncontrolled_uniform
180	2	-6.33670600788754	0	0.0163265325743921	Uncontrolled_uniform
225	2	-6.33670600788754	0	0.0085965903538109	Uncontrolled_uniform
270	2	-6.33670600788754	0	0.0189449387419833	Uncontrolled_uniform
315	2	-6.33670600788754	0	0.004027065855582	Uncontrolled_uniform
0	2	-5.00879288834536	0	0.0193402584910134	Uncontrolled_uniform
45	2	-5.00879288834536	0.00466498159730694	0.0247861420230304	Uncontrolled_uniform
90	2	-5.00879288834536	0.00934834735854415	0.0296147708143643	Uncontrolled_uniform
135	2	-5.00879288834536	0.0019560034155684	0.0352080614802312	Uncontrolled_uniform
180	2	-5.00879288834536	0	0.0408163314359802	Uncontrolled_uniform
225	2	-5.00879288834536	0	0.0395443156275301	Uncontrolled_uniform
270	2	-5.00879288834536	0	0.0213130560847312	Uncontrolled_uniform
315	2	-5.00879288834536	0	0.02013532927791	Uncontrolled_uniform
0	2	-3.68087976880318	0.00599253035804113	0.0628558400957936	Uncontrolled_uniform
45	2	-3.68087976880318	0.0499819456854315	0.0729004177147952	Uncontrolled_uniform
90	2	-3.68087976880318	0.0716706630821718	0.0761522678083653	Uncontrolled_uniform
135	2	-3.68087976880318	0.0567240990514837	0.0743281297915993	Uncontrolled_uniform
180	2	-3.68087976880318	0.0122448994307941	0.0857142960155584	Uncontrolled_uniform
225	2	-3.68087976880318	0	0.0790886312550603	Uncontrolled_uniform
270	2	-3.68087976880318	0	0.0852522243389247	Uncontrolled_uniform
315	2	-3.68087976880318	0	0.0865819158950131	Uncontrolled_uniform
0	2	-2.352966649261	0.0759053845351876	0.148678237149666	Uncontrolled_uniform
45	2	-2.352966649261	0.20659204216645	0.123930710115152	Uncontrolled_uniform
90	2	-2.352966649261	0.184889536646762	0.119516753643684	Uncontrolled_uniform
135	2	-2.352966649261	0.174084303985588	0.0978001707784201	Uncontrolled_uniform
180	2	-2.352966649261	0.0632653137257693	0.10204082858995	Uncontrolled_uniform
225	2	-2.352966649261	0.00515795421228654	0.127229537236401	Uncontrolled_uniform
270	2	-2.352966649261	0.00231000403372342	0.116037749794647	Uncontrolled_uniform
315	2	-2.352966649261	0.00320451623401632	0.142960837873161	Uncontrolled_uniform
0	2	-1.02505352971882	0.31760410897618	0.146260704838289	Uncontrolled_uniform
45	2	-1.02505352971882	0.279232469895944	0.16038091897255	Uncontrolled_uniform
90	2	-1.02505352971882	0.198392705053548	0.141727831754458	Uncontrolled_uniform
135	2	-1.02505352971882	0.211248368881387	0.131052228843083	Uncontrolled_uniform
180	2	-1.02505352971882	0.18571430803371	0.122448994307941	Uncontrolled_uniform
225	2	-1.02505352971882	0.085965903538109	0.130668173377926	Uncontrolled_uniform
270	2	-1.02505352971882	0.0231000403372342	0.151559509935866	Uncontrolled_uniform
315	2	-1.02505352971882	0.161828069817824	0.159069101295489	Uncontrolled_uniform
0	2	0.302859589823361	0.297629007782709	0.159557132550861	Uncontrolled_uniform
45	2	0.302859589823361	0.179268578525081	0.166941956566881	Uncontrolled_uniform
90	2	0.302859589823361	0.162038020881432	0.14067016136823	Uncontrolled_uniform
135	2	0.302859589823361	0.18386432106343	0.113448198102967	Uncontrolled_uniform
180	2	0.302859589823361	0.293877586339057	0.118367361164343	Uncontrolled_uniform
225	2	0.302859589823361	0.331828387657101	0.127229537236401	Uncontrolled_uniform
270	2	0.302859589823361	0.258720451777023	0.118405867137395	Uncontrolled_uniform
315	2	0.302859589823361	0.414984852305113	0.159069101295489	Uncontrolled_uniform
0	2	1.63077270936554	0.0519352631030231	0.105162655544885	Uncontrolled_uniform
45	2	1.63077270936554	0.0279898895838416	0.0882095054349022	Uncontrolled_uniform
90	2	1.63077270936554	0.0862125367510183	0.119516753643684	Uncontrolled_uniform
135	2	1.63077270936554	0.109536191271831	0.125184218596378	Uncontrolled_uniform
180	2	1.63077270936554	0.177551041746514	0.10408164516175	Uncontrolled_uniform
225	2	1.63077270936554	0.287126117817284	0.085965903538109	Uncontrolled_uniform
270	2	1.63077270936554	0.318780556653832	0.108933397766404	Uncontrolled_uniform
315	2	1.63077270936554	0.153816779232783	0.0946360476061771	Uncontrolled_uniform
0	2	2.95868582890772	0.00399502023869408	0.0761522678083653	Uncontrolled_uniform
45	2	2.95868582890772	0.00533140753977936	0.0743584260690911	Uncontrolled_uniform
90	2	2.95868582890772	0.0311611578618138	0.0698062454910015	Uncontrolled_uniform
135	2	2.95868582890772	0.0156480273245472	0.0958441673628517	Uncontrolled_uniform
180	2	2.95868582890772	0.0183673491461911	0.0877551125873574	Uncontrolled_uniform
225	2	2.95868582890772	0.0429829517690545	0.0739306770427737	Uncontrolled_uniform
270	2	2.95868582890772	0.143220250090852	0.0615710509114456	Uncontrolled_uniform
315	2	2.95868582890772	0.0192270974040979	0.0543653890503571	Uncontrolled_uniform
0	2	4.2865989484499	0	0.0181314923353251	Uncontrolled_uniform
45	2	4.2865989484499	0	0.0291601670859181	Uncontrolled_uniform
90	2	4.2865989484499	0.00830964209648369	0.0327877819730462	Uncontrolled_uniform
135	2	4.2865989484499	0	0.039120068311368	Uncontrolled_uniform
180	2	4.2865989484499	0.00204081657179901	0.0489795977231762	Uncontrolled_uniform
225	2	4.2865989484499	0	0.0429829517690545	Uncontrolled_uniform
270	2	4.2865989484499	0.00693001210117026	0.0449942295122103	Uncontrolled_uniform
315	2	4.2865989484499	0	0.024162395133492	Uncontrolled_uniform
0	2	5.61451206799209	0	0.00604383077844169	Uncontrolled_uniform
45	2	5.61451206799209	0	0.00656103759433157	Uncontrolled_uniform
90	2	5.61451206799209	0.00103870526206046	0.00846136308981837	Uncontrolled_uniform
135	2	5.61451206799209	0	0.0254280444023892	Uncontrolled_uniform
180	2	5.61451206799209	0	0.0183673491461911	Uncontrolled_uniform
225	2	5.61451206799209	0	0.0275090891321949	Uncontrolled_uniform
270	2	5.61451206799209	0	0.0165768213992354	Uncontrolled_uniform
315	2	5.61451206799209	0	0.00604059878337301	Uncontrolled_uniform
0	2	6.94242518753427	0	0.00120876615568834	Uncontrolled_uniform
45	2	6.94242518753427	0	0.000729004177147952	Uncontrolled_uniform
90	2	6.94242518753427	0	0.00423068154490918	Uncontrolled_uniform
135	2	6.94242518753427	0	0	Uncontrolled_uniform
180	2	6.94242518753427	0	0.00204081657179901	Uncontrolled_uniform
225	2	6.94242518753427	0	0.00515795421228654	Uncontrolled_uniform
270	2	6.94242518753427	0	0.00473623468549582	Uncontrolled_uniform
315	2	6.94242518753427	0	0.002013532927791	Uncontrolled_uniform
0	2	8.27033830707645	0	0	Uncontrolled_uniform
45	2	8.27033830707645	0	0	Uncontrolled_uniform
90	2	8.27033830707645	0	0	Uncontrolled_uniform
135	2	8.27033830707645	0	0	Uncontrolled_uniform
180	2	8.27033830707645	0	0	Uncontrolled_uniform
225	2	8.27033830707645	0	0.00171931807076218	Uncontrolled_uniform
270	2	8.27033830707645	0	0	Uncontrolled_uniform
315	2	8.27033830707645	0	0	Uncontrolled_uniform
0	2	9.59825142661863	0	0	Uncontrolled_uniform
45	2	9.59825142661863	0	0	Uncontrolled_uniform
90	2	9.59825142661863	0	0	Uncontrolled_uniform
135	2	9.59825142661863	0	0	Uncontrolled_uniform
180	2	9.59825142661863	0	0	Uncontrolled_uniform
225	2	9.59825142661863	0	0	Uncontrolled_uniform
270	2	9.59825142661863	0	0	Uncontrolled_uniform
315	2	9.59825142661863	0	0	Uncontrolled_uniform
0	2	10.9261645461608	0	0	Uncontrolled_uniform
45	2	10.9261645461608	0	0	Uncontrolled_uniform
90	2	10.9261645461608	0	0	Uncontrolled_uniform
135	2	10.9261645461608	0	0	Uncontrolled_uniform
180	2	10.9261645461608	0	0	Uncontrolled_uniform
225	2	10.9261645461608	0	0	Uncontrolled_uniform
270	2	10.9261645461608	0	0	Uncontrolled_uniform
315	2	10.9261645461608	0	0	Uncontrolled_uniform
0	2	12.254077665703	0	0	Uncontrolled_uniform
45	2	12.254077665703	0	0	Uncontrolled_uniform
90	2	12.254077665703	0	0	Uncontrolled_uniform
135	2	12.254077665703	0	0	Uncontrolled_uniform
180	2	12.254077665703	0	0	Uncontrolled_uniform
225	2	12.254077665703	0	0	Uncontrolled_uniform
270	2	12.254077665703	0	0	Uncontrolled_uniform
315	2	12.254077665703	0	0	Uncontrolled_uniform
0	2	13.5819907852452	0	0	Uncontrolled_uniform
45	2	13.5819907852452	0	0	Uncontrolled_uniform
90	2	13.5819907852452	0	0	Uncontrolled_uniform
135	2	13.5819907852452	0	0	Uncontrolled_uniform
180	2	13.5819907852452	0	0	Uncontrolled_uniform
225	2	13.5819907852452	0	0	Uncontrolled_uniform
270	2	13.5819907852452	0	0	Uncontrolled_uniform
315	2	13.5819907852452	0	0	Uncontrolled_uniform
0	2	14.9099039047874	0	0	Uncontrolled_uniform
45	2	14.9099039047874	0	0	Uncontrolled_uniform
90	2	14.9099039047874	0	0	Uncontrolled_uniform
135	2	14.9099039047874	0	0	Uncontrolled_uniform
180	2	14.9099039047874	0	0	Uncontrolled_uniform
225	2	14.9099039047874	0	0	Uncontrolled_uniform
270	2	14.9099039047874	0	0	Uncontrolled_uniform
315	2	14.9099039047874	0	0	Uncontrolled_uniform
0	2	16.2378170243295	0	0	Uncontrolled_uniform
45	2	16.2378170243295	0	0	Uncontrolled_uniform
90	2	16.2378170243295	0	0	Uncontrolled_uniform
135	2	16.2378170243295	0	0	Uncontrolled_uniform
180	2	16.2378170243295	0	0	Uncontrolled_uniform
225	2	16.2378170243295	0	0	Uncontrolled_uniform
270	2	16.2378170243295	0	0	Uncontrolled_uniform
315	2	16.2378170243295	0	0	Uncontrolled_uniform
0	3	-11.6483584860563	0	0	Uncontrolled_uniform
45	3	-11.6483584860563	0	0	Uncontrolled_uniform
90	3	-11.6483584860563	0	0	Uncontrolled_uniform
135	3	-11.6483584860563	0	0.00195854698307889	Uncontrolled_uniform
180	3	-11.6483584860563	0	0	Uncontrolled_uniform
225	3	-11.6483584860563	0	0	Uncontrolled_uniform
270	3	-11.6483584860563	0	0	Uncontrolled_uniform
315	3	-11.6483584860563	0	0	Uncontrolled_uniform
0	3	-10.3204453665141	0	0.00120876615568834	Uncontrolled_uniform
45	3	-10.3204453665141	0	0.0014580083542959	Uncontrolled_uniform
90	3	-10.3204453665141	0	0.00740369270359107	Uncontrolled_uniform
135	3	-10.3204453665141	0	0.00391709396615779	Uncontrolled_uniform
180	3	-10.3204453665141	0	0.0102040828589951	Uncontrolled_uniform
225	3	-10.3204453665141	0	0.0085965903538109	Uncontrolled_uniform
270	3	-10.3204453665141	0	0.00473623468549582	Uncontrolled_uniform
315	3	-10.3204453665141	0	0	Uncontrolled_uniform
0	3	-8.9925322469719	0	0.010878895401195	Uncontrolled_uniform
45	3	-8.9925322469719	0	0.00947705430292338	Uncontrolled_uniform
90	3	-8.9925322469719	0	0.0137497150209548	Uncontrolled_uniform
135	3	-8.9925322469719	0	0.0156683758646312	Uncontrolled_uniform
180	3	-8.9925322469719	0	0.0163265325743921	Uncontrolled_uniform
225	3	-8.9925322469719	0	0.0103159084245731	Uncontrolled_uniform
270	3	-8.9925322469719	0	0.0142087040564874	Uncontrolled_uniform
315	3	-8.9925322469719	0	0.00604059878337301	Uncontrolled_uniform
0	3	-7.66461912742972	0	0.0241753231137668	Uncontrolled_uniform
45	3	-7.66461912742972	0.00066642594247242	0.0284311629087701	Uncontrolled_uniform
90	3	-7.66461912742972	0	0.0349031227455008	Uncontrolled_uniform
135	3	-7.66461912742972	0	0.037212392678499	Uncontrolled_uniform
180	3	-7.66461912742972	0	0.0346938817205832	Uncontrolled_uniform
225	3	-7.66461912742972	0	0.0343863614152436	Uncontrolled_uniform
270	3	-7.66461912742972	0	0.0331536427984707	Uncontrolled_uniform
315	3	-7.66461912742972	0	0.018121796350119	Uncontrolled_uniform
0	3	-6.33670600788754	0.000998755059673521	0.0483506462275335	Uncontrolled_uniform
45	3	-6.33670600788754	0.00199927782741726	0.0488432798689128	Uncontrolled_uniform
90	3	-6.33670600788754	0.00207741052412092	0.0613448824011832	Uncontrolled_uniform
135	3	-6.33670600788754	0.0019560034155684	0.0489636745769724	Uncontrolled_uniform
180	3	-6.33670600788754	0	0.0714285800129653	Uncontrolled_uniform
225	3	-6.33670600788754	0	0.0550181782643897	Uncontrolled_uniform
270	3	-6.33670600788754	0	0.0639391682541935	Uncontrolled_uniform
315	3	-6.33670600788754	0	0.048324790266984	Uncontrolled_uniform
0	3	-5.00879288834536	0.00199751011934704	0.0604383077844169	Uncontrolled_uniform
45	3	-5.00879288834536	0.00266570376988968	0.0721714135376473	Uncontrolled_uniform
90	3	-5.00879288834536	0.00103870526206046	0.0951903347604566	Uncontrolled_uniform
135	3	-5.00879288834536	0.0039120068311368	0.0842175202723924	Uncontrolled_uniform
180	3	-5.00879288834536	0.00408163314359802	0.0734693965847644	Uncontrolled_uniform
225	3	-5.00879288834536	0	0.0911238577503955	Uncontrolled_uniform
270	3	-5.00879288834536	0	0.0710435202824372	Uncontrolled_uniform
315	3	-5.00879288834536	0.00160225811700816	0.0745007183282671	Uncontrolled_uniform
0	3	-3.68087976880318	0.00399502023869408	0.0954925262993787	Uncontrolled_uniform
45	3	-3.68087976880318	0.0173270745042829	0.091125522143494	Uncontrolled_uniform
90	3	-3.68087976880318	0.0311611578618139	0.0877866420568656	Uncontrolled_uniform
135	3	-3.68087976880318	0.0117360204934104	0.101844443120102	Uncontrolled_uniform
180	3	-3.68087976880318	0.0142857160025931	0.0836734794437594	Uncontrolled_uniform
225	3	-3.68087976880318	0	0.113474992670304	Uncontrolled_uniform
270	3	-3.68087976880318	0	0.0876203416816726	Uncontrolled_uniform
315	3	-3.68087976880318	0	0.102690179317341	Uncontrolled_uniform
0	3	-2.352966649261	0.0329589169692262	0.118459083257457	Uncontrolled_uniform
45	3	-2.352966649261	0.0699747239596041	0.107892618217897	Uncontrolled_uniform
90	3	-2.352966649261	0.124644631447255	0.10576703862273	Uncontrolled_uniform
135	3	-2.352966649261	0.0743281297915993	0.125347006917049	Uncontrolled_uniform
180	3	-2.352966649261	0.0489795977231762	0.108163278305348	Uncontrolled_uniform
225	3	-2.352966649261	0.0223511349199083	0.110036356528779	Uncontrolled_uniform
270	3	-2.352966649261	0.0323400564721279	0.137350805879379	Uncontrolled_uniform
315	3	-2.352966649261	0.0144203230530734	0.112757843956296	Uncontrolled_uniform
0	3	-1.02505352971882	0.203746032173398	0.11604155094608	Uncontrolled_uniform
45	3	-1.02505352971882	0.268569654816385	0.126117722646596	Uncontrolled_uniform
90	3	-1.02505352971882	0.279411715494264	0.0962480051466839	Uncontrolled_uniform
135	3	-1.02505352971882	0.185820324478998	0.121429912950891	Uncontrolled_uniform
180	3	-1.02505352971882	0.120408177736142	0.0938775623027545	Uncontrolled_uniform
225	3	-1.02505352971882	0.187405669713078	0.101439766174969	Uncontrolled_uniform
270	3	-1.02505352971882	0.18942033076532	0.134982688536631	Uncontrolled_uniform
315	3	-1.02505352971882	0.161828069817824	0.110744311028505	Uncontrolled_uniform
0	3	0.302859589823361	0.398503268809735	0.136590575592782	Uncontrolled_uniform
45	3	0.302859589823361	0.308555211364731	0.121743697583708	Uncontrolled_uniform
90	3	0.302859589823361	0.251366673418632	0.112113060940093	Uncontrolled_uniform
135	3	0.302859589823361	0.254280444023892	0.0979273491539447	Uncontrolled_uniform
180	3	0.302859589823361	0.265306154333871	0.130612260595137	Uncontrolled_uniform
225	3	0.302859589823361	0.309477252737192	0.106597720387255	Uncontrolled_uniform
270	3	0.302859589823361	0.339570592957343	0.104197163080908	Uncontrolled_uniform
315	3	0.302859589823361	0.384541948081958	0.12081197566746	Uncontrolled_uniform
0	3	1.63077270936554	0.10786554644474	0.085822397053872	Uncontrolled_uniform
45	3	1.63077270936554	0.0826368168665801	0.0845644845491625	Uncontrolled_uniform
90	3	1.63077270936554	0.0592061999374463	0.0761522678083653	Uncontrolled_uniform
135	3	1.63077270936554	0.189732331310135	0.0587564094923668	Uncontrolled_uniform
180	3	1.63077270936554	0.228571456041489	0.0673469468693673	Uncontrolled_uniform
225	3	1.63077270936554	0.185686351642315	0.0773693131842981	Uncontrolled_uniform
270	3	1.63077270936554	0.173250302529256	0.0568348162259498	Uncontrolled_uniform
315	3	1.63077270936554	0.181055167221922	0.0966495805339681	Uncontrolled_uniform
0	3	2.95868582890772	0.00299626517902056	0.0483506462275335	Uncontrolled_uniform
45	3	2.95868582890772	0.00066642594247242	0.0444692548060251	Uncontrolled_uniform
90	3	2.95868582890772	0.00415482104824185	0.0444221562215464	Uncontrolled_uniform
135	3	2.95868582890772	0.0273840478179576	0.0430880336277357	Uncontrolled_uniform
180	3	2.95868582890772	0.0612244971539703	0.0408163314359802	Uncontrolled_uniform
225	3	2.95868582890772	0.0343863614152436	0.0326670433444814	Uncontrolled_uniform
270	3	2.95868582890772	0.0184800322697874	0.0331536427984707	Uncontrolled_uniform
315	3	2.95868582890772	0.00961354870204895	0.050338323194775	Uncontrolled_uniform
0	3	4.2865989484499	0	0.00725259693413003	Uncontrolled_uniform
45	3	4.2865989484499	0	0.015309087720107	Uncontrolled_uniform
90	3	4.2865989484499	0	0.017980396565864	Uncontrolled_uniform
135	3	4.2865989484499	0.0039120068311368	0.0117512818984734	Uncontrolled_uniform
180	3	4.2865989484499	0.0102040828589951	0.0204081657179901	Uncontrolled_uniform
225	3	4.2865989484499	0.0137545445660974	0.0085965903538109	Uncontrolled_uniform
270	3	4.2865989484499	0	0.00947246937099163	Uncontrolled_uniform
315	3	4.2865989484499	0	0.010067664638955	Uncontrolled_uniform
0	3	5.61451206799209	0	0	Uncontrolled_uniform
45	3	5.61451206799209	0	0.0014580083542959	Uncontrolled_uniform
90	3	5.61451206799209	0	0	Uncontrolled_uniform
135	3	5.61451206799209	0	0.00195854698307889	Uncontrolled_uniform
180	3	5.61451206799209	0	0.00204081657179901	Uncontrolled_uniform
225	3	5.61451206799209	0	0.00343863614152436	Uncontrolled_uniform
270	3	5.61451206799209	0	0.00236811734274791	Uncontrolled_uniform
315	3	5.61451206799209	0	0.002013532927791	Uncontrolled_uniform
0	3	6.94242518753427	0	0	Uncontrolled_uniform
45	3	6.94242518753427	0	0	Uncontrolled_uniform
90	3	6.94242518753427	0	0	Uncontrolled_uniform
135	3	6.94242518753427	0	0	Uncontrolled_uniform
180	3	6.94242518753427	0	0	Uncontrolled_uniform
225	3	6.94242518753427	0	0	Uncontrolled_uniform
270	3	6.94242518753427	0	0	Uncontrolled_uniform
315	3	6.94242518753427	0	0	Uncontrolled_uniform
0	3	8.27033830707645	0	0	Uncontrolled_uniform
45	3	8.27033830707645	0	0	Uncontrolled_uniform
90	3	8.27033830707645	0	0	Uncontrolled_uniform
135	3	8.27033830707645	0	0	Uncontrolled_uniform
180	3	8.27033830707645	0	0	Uncontrolled_uniform
225	3	8.27033830707645	0	0	Uncontrolled_uniform
270	3	8.27033830707645	0	0	Uncontrolled_uniform
315	3	8.27033830707645	0	0	Uncontrolled_uniform
0	3	9.59825142661863	0	0	Uncontrolled_uniform
45	3	9.59825142661863	0	0	Uncontrolled_uniform
90	3	9.59825142661863	0	0	Uncontrolled_uniform
135	3	9.59825142661863	0	0	Uncontrolled_uniform
180	3	9.59825142661863	0	0	Uncontrolled_uniform
225	3	9.59825142661863	0	0	Uncontrolled_uniform
270	3	9.59825142661863	0	0	Uncontrolled_uniform
315	3	9.59825142661863	0	0	Uncontrolled_uniform
0	3	10.9261645461608	0	0	Uncontrolled_uniform
45	3	10.9261645461608	0	0	Uncontrolled_uniform
90	3	10.9261645461608	0	0	Uncontrolled_uniform
135	3	10.9261645461608	0	0	Uncontrolled_uniform
180	3	10.9261645461608	0	0	Uncontrolled_uniform
225	3	10.9261645461608	0	0	Uncontrolled_uniform
270	3	10.9261645461608	0	0	Uncontrolled_uniform
315	3	10.9261645461608	0	0	Uncontrolled_uniform
0	3	12.254077665703	0	0	Uncontrolled_uniform
45	3	12.254077665703	0	0	Uncontrolled_uniform
90	3	12.254077665703	0	0	Uncontrolled_uniform
135	3	12.254077665703	0	0	Uncontrolled_uniform
180	3	12.254077665703	0	0	Uncontrolled_uniform
225	3	12.254077665703	0	0	Uncontrolled_uniform
270	3	12.254077665703	0	0	Uncontrolled_uniform
315	3	12.254077665703	0	0	Uncontrolled_uniform
0	3	13.5819907852452	0	0	Uncontrolled_uniform
45	3	13.5819907852452	0	0	Uncontrolled_uniform
90	3	13.5819907852452	0	0	Uncontrolled_uniform
135	3	13.5819907852452	0	0	Uncontrolled_uniform
180	3	13.5819907852452	0	0	Uncontrolled_uniform
225	3	13.5819907852452	0	0	Uncontrolled_uniform
270	3	13.5819907852452	0	0	Uncontrolled_uniform
315	3	13.5819907852452	0	0	Uncontrolled_uniform
0	3	14.9099039047874	0	0	Uncontrolled_uniform
45	3	14.9099039047874	0	0	Uncontrolled_uniform
90	3	14.9099039047874	0	0	Uncontrolled_uniform
135	3	14.9099039047874	0	0	Uncontrolled_uniform
180	3	14.9099039047874	0	0	Uncontrolled_uniform
225	3	14.9099039047874	0	0	Uncontrolled_uniform
270	3	14.9099039047874	0	0	Uncontrolled_uniform
315	3	14.9099039047874	0	0	Uncontrolled_uniform
0	3	16.2378170243295	0	0	Uncontrolled_uniform
45	3	16.2378170243295	0	0	Uncontrolled_uniform
90	3	16.2378170243295	0	0	Uncontrolled_uniform
135	3	16.2378170243295	0	0	Uncontrolled_uniform
180	3	16.2378170243295	0	0	Uncontrolled_uniform
225	3	16.2378170243295	0	0	Uncontrolled_uniform
270	3	16.2378170243295	0	0	Uncontrolled_uniform
315	3	16.2378170243295	0	0	Uncontrolled_uniform
0	1	-11.6483584860563	0	0	Uncontrolled_empirical
45	1	-11.6483584860563	0	0	Uncontrolled_empirical
90	1	-11.6483584860563	0	0	Uncontrolled_empirical
135	1	-11.6483584860563	0	0	Uncontrolled_empirical
180	1	-11.6483584860563	0	0	Uncontrolled_empirical
225	1	-11.6483584860563	0	0	Uncontrolled_empirical
270	1	-11.6483584860563	0	0	Uncontrolled_empirical
315	1	-11.6483584860563	0	0	Uncontrolled_empirical
0	1	-10.3204453665141	0	0	Uncontrolled_empirical
45	1	-10.3204453665141	0	0	Uncontrolled_empirical
90	1	-10.3204453665141	0	0	Uncontrolled_empirical
135	1	-10.3204453665141	0	0	Uncontrolled_empirical
180	1	-10.3204453665141	0	0	Uncontrolled_empirical
225	1	-10.3204453665141	0	0	Uncontrolled_empirical
270	1	-10.3204453665141	0	0	Uncontrolled_empirical
315	1	-10.3204453665141	0	0	Uncontrolled_empirical
0	1	-8.9925322469719	0	0	Uncontrolled_empirical
45	1	-8.9925322469719	0	0	Uncontrolled_empirical
90	1	-8.9925322469719	0	0	Uncontrolled_empirical
135	1	-8.9925322469719	0	0	Uncontrolled_empirical
180	1	-8.9925322469719	0	0	Uncontrolled_empirical
225	1	-8.9925322469719	0	0	Uncontrolled_empirical
270	1	-8.9925322469719	0	0	Uncontrolled_empirical
315	1	-8.9925322469719	0	0	Uncontrolled_empirical
0	1	-7.66461912742972	0	0	Uncontrolled_empirical
45	1	-7.66461912742972	0	0	Uncontrolled_empirical
90	1	-7.66461912742972	0	0	Uncontrolled_empirical
135	1	-7.66461912742972	0	0	Uncontrolled_empirical
180	1	-7.66461912742972	0	0	Uncontrolled_empirical
225	1	-7.66461912742972	0	0	Uncontrolled_empirical
270	1	-7.66461912742972	0	0	Uncontrolled_empirical
315	1	-7.66461912742972	0	0	Uncontrolled_empirical
0	1	-6.33670600788754	0	0	Uncontrolled_empirical
45	1	-6.33670600788754	0	0	Uncontrolled_empirical
90	1	-6.33670600788754	0	0	Uncontrolled_empirical
135	1	-6.33670600788754	0	0	Uncontrolled_empirical
180	1	-6.33670600788754	0	0	Uncontrolled_empirical
225	1	-6.33670600788754	0	0	Uncontrolled_empirical
270	1	-6.33670600788754	0	0	Uncontrolled_empirical
315	1	-6.33670600788754	0.00160225811700816	0	Uncontrolled_empirical
0	1	-5.00879288834536	0.0129838157757558	0.0049937752983676	Uncontrolled_empirical
45	1	-5.00879288834536	0.00066642594247242	0.0033321297123621	Uncontrolled_empirical
90	1	-5.00879288834536	0	0	Uncontrolled_empirical
135	1	-5.00879288834536	0	0	Uncontrolled_empirical
180	1	-5.00879288834536	0	0	Uncontrolled_empirical
225	1	-5.00879288834536	0	0.00687727228304872	Uncontrolled_empirical
270	1	-5.00879288834536	0.00462000806744684	0.00924001613489368	Uncontrolled_empirical
315	1	-5.00879288834536	0.0769083896163916	0.00640903246803264	Uncontrolled_empirical
0	1	-3.68087976880318	0.179775910741234	0.0749066294755141	Uncontrolled_empirical
45	1	-3.68087976880318	0.0273234636413692	0.0659761683047696	Uncontrolled_empirical
90	1	-3.68087976880318	0.00207741052412092	0.0311611578618138	Uncontrolled_empirical
135	1	-3.68087976880318	0.0019560034155684	0.0273840478179576	Uncontrolled_empirical
180	1	-3.68087976880318	0	0.0469387811513772	Uncontrolled_empirical
225	1	-3.68087976880318	0.00515795421228654	0.0584568144059141	Uncontrolled_empirical
270	1	-3.68087976880318	0.0508200887419152	0.0739201290791494	Uncontrolled_empirical
315	1	-3.68087976880318	0.33967872080573	0.102544519488522	Uncontrolled_empirical
0	1	-2.352966649261	0.302622783081077	0.176779645562213	Uncontrolled_empirical
45	1	-2.352966649261	0.16527363373316	0.12395522529987	Uncontrolled_empirical
90	1	-2.352966649261	0.0332385683859348	0.118412399874893	Uncontrolled_empirical
135	1	-2.352966649261	0.0019560034155684	0.138876242505357	Uncontrolled_empirical
180	1	-2.352966649261	0.00408163314359802	0.159183692600323	Uncontrolled_empirical
225	1	-2.352966649261	0.0343863614152436	0.132387491448688	Uncontrolled_empirical
270	1	-2.352966649261	0.17556030656298	0.154770270259469	Uncontrolled_empirical
315	1	-2.352966649261	0.227520652615159	0.174646134753889	Uncontrolled_empirical
0	1	-1.02505352971882	0.166792094965478	0.164794584846131	Uncontrolled_empirical
45	1	-1.02505352971882	0.249243302484685	0.123288799357398	Uncontrolled_empirical
90	1	-1.02505352971882	0.131915568281679	0.162038020881432	Uncontrolled_empirical
135	1	-1.02505352971882	0.00782401366227361	0.123228215180809	Uncontrolled_empirical
180	1	-1.02505352971882	0.0265306154333871	0.126530627451539	Uncontrolled_empirical
225	1	-1.02505352971882	0.115194310741066	0.151299990227072	Uncontrolled_empirical
270	1	-1.02505352971882	0.272580475979363	0.131670229922235	Uncontrolled_empirical
315	1	-1.02505352971882	0.0817151639674161	0.1570212954668	Uncontrolled_empirical
0	1	0.302859589823361	0.0699128541771465	0.119850607160822	Uncontrolled_empirical
45	1	0.302859589823361	0.193929949259474	0.12395522529987	Uncontrolled_empirical
90	1	0.302859589823361	0.194237884005306	0.124644631447255	Uncontrolled_empirical
135	1	0.302859589823361	0.0606361058826205	0.129096225427515	Uncontrolled_empirical
180	1	0.302859589823361	0.0448979645795782	0.128571444023338	Uncontrolled_empirical
225	1	0.302859589823361	0.168493170934694	0.11863294688259	Uncontrolled_empirical
270	1	0.302859589823361	0.147840258158299	0.103950181517554	Uncontrolled_empirical
315	1	0.302859589823361	0.0224316136381142	0.10414677760553	Uncontrolled_empirical
0	1	1.63077270936554	0.0199751011934704	0.072909119356167	Uncontrolled_empirical
45	1	1.63077270936554	0.0833032428090525	0.108627428623004	Uncontrolled_empirical
90	1	1.63077270936554	0.165154136667613	0.103870526206046	Uncontrolled_empirical
135	1	1.63077270936554	0.133008232258651	0.0919321605317149	Uncontrolled_empirical
180	1	1.63077270936554	0.10408164516175	0.0918367457309555	Uncontrolled_empirical
225	1	1.63077270936554	0.190844305854602	0.0876852216088712	Uncontrolled_empirical
270	1	1.63077270936554	0.071610125045426	0.110880193618724	Uncontrolled_empirical
315	1	1.63077270936554	0.00320451623401632	0.10414677760553	Uncontrolled_empirical
0	1	2.95868582890772	0.000998755059673521	0.07091160923682	Uncontrolled_empirical
45	1	2.95868582890772	0.0279898895838416	0.0706411499020765	Uncontrolled_empirical
90	1	2.95868582890772	0.126722041971376	0.06751584203393	Uncontrolled_empirical
135	1	2.95868582890772	0.144744252752062	0.105624184440694	Uncontrolled_empirical
180	1	2.95868582890772	0.167346958887519	0.0775510297283624	Uncontrolled_empirical
225	1	2.95868582890772	0.106597720387255	0.0962818119626821	Uncontrolled_empirical
270	1	2.95868582890772	0.0207900363035108	0.0531300927756386	Uncontrolled_empirical
315	1	2.95868582890772	0	0.0352496785741795	Uncontrolled_empirical
0	1	4.2865989484499	0	0.0379526922675938	Uncontrolled_empirical
45	1	4.2865989484499	0.00399855565483452	0.0633104645348799	Uncontrolled_empirical
90	1	4.2865989484499	0.0592061999374463	0.0602449051995068	Uncontrolled_empirical
135	1	4.2865989484499	0.150612262998767	0.0801961400383045	Uncontrolled_empirical
180	1	4.2865989484499	0.138775526882333	0.0714285800129654	Uncontrolled_empirical
225	1	4.2865989484499	0.0756499951135359	0.0498602240521032	Uncontrolled_empirical
270	1	4.2865989484499	0.00231000403372342	0.0485100847081918	Uncontrolled_empirical
315	1	4.2865989484499	0	0.040056452925204	Uncontrolled_empirical
0	1	5.61451206799209	0	0.0179775910741234	Uncontrolled_empirical
45	1	5.61451206799209	0.00133285188494484	0.0399855565483452	Uncontrolled_empirical
90	1	5.61451206799209	0.0321998631238743	0.0571287894133254	Uncontrolled_empirical
135	1	5.61451206799209	0.117360204934104	0.0332520580646628	Uncontrolled_empirical
180	1	5.61451206799209	0.132653077166936	0.0285714320051861	Uncontrolled_empirical
225	1	5.61451206799209	0.037824997556768	0.0326670433444814	Uncontrolled_empirical
270	1	5.61451206799209	0.00693001210117026	0.0508200887419152	Uncontrolled_empirical
315	1	5.61451206799209	0	0.0192270974040979	Uncontrolled_empirical
0	1	6.94242518753427	0	0.00898879553706169	Uncontrolled_empirical
45	1	6.94242518753427	0	0.0179935004467553	Uncontrolled_empirical
90	1	6.94242518753427	0.00727093683442323	0.0176579894550278	Uncontrolled_empirical
135	1	6.94242518753427	0.0821521434538729	0.00978001707784201	Uncontrolled_empirical
180	1	6.94242518753427	0.0816326628719604	0.00816326628719604	Uncontrolled_empirical
225	1	6.94242518753427	0.00687727228304872	0.0154738626368596	Uncontrolled_empirical
270	1	6.94242518753427	0	0.0138600242023405	Uncontrolled_empirical
315	1	6.94242518753427	0	0.00640903246803264	Uncontrolled_empirical
0	1	8.27033830707645	0	0.00199751011934704	Uncontrolled_empirical
45	1	8.27033830707645	0	0.0099963891370863	Uncontrolled_empirical
90	1	8.27033830707645	0.00103870526206046	0.00623223157236277	Uncontrolled_empirical
135	1	8.27033830707645	0.0449880785580732	0.00782401366227361	Uncontrolled_empirical
180	1	8.27033830707645	0.0306122485769851	0.0122448994307941	Uncontrolled_empirical
225	1	8.27033830707645	0.0103159084245731	0.00171931807076218	Uncontrolled_empirical
270	1	8.27033830707645	0	0.00231000403372342	Uncontrolled_empirical
315	1	8.27033830707645	0	0.00320451623401632	Uncontrolled_empirical
0	1	9.59825142661863	0	0	Uncontrolled_empirical
45	1	9.59825142661863	0	0.00133285188494484	Uncontrolled_empirical
90	1	9.59825142661863	0	0.00415482104824185	Uncontrolled_empirical
135	1	9.59825142661863	0.00586801024670521	0.0058680102467052	Uncontrolled_empirical
180	1	9.59825142661863	0.0163265325743921	0.00204081657179901	Uncontrolled_empirical
225	1	9.59825142661863	0.00171931807076218	0.00171931807076218	Uncontrolled_empirical
270	1	9.59825142661863	0	0	Uncontrolled_empirical
315	1	9.59825142661863	0	0	Uncontrolled_empirical
0	1	10.9261645461608	0	0.000998755059673521	Uncontrolled_empirical
45	1	10.9261645461608	0	0.00066642594247242	Uncontrolled_empirical
90	1	10.9261645461608	0	0	Uncontrolled_empirical
135	1	10.9261645461608	0.0019560034155684	0	Uncontrolled_empirical
180	1	10.9261645461608	0.00204081657179901	0	Uncontrolled_empirical
225	1	10.9261645461608	0	0	Uncontrolled_empirical
270	1	10.9261645461608	0	0	Uncontrolled_empirical
315	1	10.9261645461608	0	0	Uncontrolled_empirical
0	1	12.254077665703	0	0	Uncontrolled_empirical
45	1	12.254077665703	0	0	Uncontrolled_empirical
90	1	12.254077665703	0	0	Uncontrolled_empirical
135	1	12.254077665703	0	0	Uncontrolled_empirical
180	1	12.254077665703	0.00204081657179901	0	Uncontrolled_empirical
225	1	12.254077665703	0	0	Uncontrolled_empirical
270	1	12.254077665703	0	0	Uncontrolled_empirical
315	1	12.254077665703	0	0	Uncontrolled_empirical
0	1	13.5819907852452	0	0	Uncontrolled_empirical
45	1	13.5819907852452	0	0	Uncontrolled_empirical
90	1	13.5819907852452	0	0	Uncontrolled_empirical
135	1	13.5819907852452	0	0	Uncontrolled_empirical
180	1	13.5819907852452	0.00204081657179901	0	Uncontrolled_empirical
225	1	13.5819907852452	0	0	Uncontrolled_empirical
270	1	13.5819907852452	0	0	Uncontrolled_empirical
315	1	13.5819907852452	0	0	Uncontrolled_empirical
0	1	14.9099039047874	0	0	Uncontrolled_empirical
45	1	14.9099039047874	0	0	Uncontrolled_empirical
90	1	14.9099039047874	0	0	Uncontrolled_empirical
135	1	14.9099039047874	0	0	Uncontrolled_empirical
180	1	14.9099039047874	0	0	Uncontrolled_empirical
225	1	14.9099039047874	0	0	Uncontrolled_empirical
270	1	14.9099039047874	0	0	Uncontrolled_empirical
315	1	14.9099039047874	0	0	Uncontrolled_empirical
0	1	16.2378170243295	0	0	Uncontrolled_empirical
45	1	16.2378170243295	0	0	Uncontrolled_empirical
90	1	16.2378170243295	0	0	Uncontrolled_empirical
135	1	16.2378170243295	0	0	Uncontrolled_empirical
180	1	16.2378170243295	0	0	Uncontrolled_empirical
225	1	16.2378170243295	0	0	Uncontrolled_empirical
270	1	16.2378170243295	0	0	Uncontrolled_empirical
315	1	16.2378170243295	0	0	Uncontrolled_empirical
0	2	-11.6483584860563	0	0	Uncontrolled_empirical
45	2	-11.6483584860563	0	0	Uncontrolled_empirical
90	2	-11.6483584860563	0	0	Uncontrolled_empirical
135	2	-11.6483584860563	0	0	Uncontrolled_empirical
180	2	-11.6483584860563	0	0	Uncontrolled_empirical
225	2	-11.6483584860563	0	0	Uncontrolled_empirical
270	2	-11.6483584860563	0	0	Uncontrolled_empirical
315	2	-11.6483584860563	0	0	Uncontrolled_empirical
0	2	-10.3204453665141	0	0	Uncontrolled_empirical
45	2	-10.3204453665141	0	0	Uncontrolled_empirical
90	2	-10.3204453665141	0	0	Uncontrolled_empirical
135	2	-10.3204453665141	0	0	Uncontrolled_empirical
180	2	-10.3204453665141	0	0	Uncontrolled_empirical
225	2	-10.3204453665141	0	0	Uncontrolled_empirical
270	2	-10.3204453665141	0	0	Uncontrolled_empirical
315	2	-10.3204453665141	0	0	Uncontrolled_empirical
0	2	-8.9925322469719	0	0	Uncontrolled_empirical
45	2	-8.9925322469719	0	0	Uncontrolled_empirical
90	2	-8.9925322469719	0	0	Uncontrolled_empirical
135	2	-8.9925322469719	0	0	Uncontrolled_empirical
180	2	-8.9925322469719	0	0	Uncontrolled_empirical
225	2	-8.9925322469719	0	0	Uncontrolled_empirical
270	2	-8.9925322469719	0	0	Uncontrolled_empirical
315	2	-8.9925322469719	0	0	Uncontrolled_empirical
0	2	-7.66461912742972	0	0	Uncontrolled_empirical
45	2	-7.66461912742972	0	0	Uncontrolled_empirical
90	2	-7.66461912742972	0	0	Uncontrolled_empirical
135	2	-7.66461912742972	0	0	Uncontrolled_empirical
180	2	-7.66461912742972	0	0	Uncontrolled_empirical
225	2	-7.66461912742972	0	0	Uncontrolled_empirical
270	2	-7.66461912742972	0	0	Uncontrolled_empirical
315	2	-7.66461912742972	0	0	Uncontrolled_empirical
0	2	-6.33670600788754	0	0	Uncontrolled_empirical
45	2	-6.33670600788754	0	0	Uncontrolled_empirical
90	2	-6.33670600788754	0	0	Uncontrolled_empirical
135	2	-6.33670600788754	0	0	Uncontrolled_empirical
180	2	-6.33670600788754	0	0	Uncontrolled_empirical
225	2	-6.33670600788754	0	0	Uncontrolled_empirical
270	2	-6.33670600788754	0	0	Uncontrolled_empirical
315	2	-6.33670600788754	0	0	Uncontrolled_empirical
0	2	-5.00879288834536	0	0	Uncontrolled_empirical
45	2	-5.00879288834536	0.00466498159730694	0	Uncontrolled_empirical
90	2	-5.00879288834536	0.00934834735854415	0	Uncontrolled_empirical
135	2	-5.00879288834536	0.0019560034155684	0	Uncontrolled_empirical
180	2	-5.00879288834536	0	0	Uncontrolled_empirical
225	2	-5.00879288834536	0	0	Uncontrolled_empirical
270	2	-5.00879288834536	0	0	Uncontrolled_empirical
315	2	-5.00879288834536	0	0	Uncontrolled_empirical
0	2	-3.68087976880318	0.00599253035804113	0.00399502023869408	Uncontrolled_empirical
45	2	-3.68087976880318	0.0499819456854315	0.012662092906976	Uncontrolled_empirical
90	2	-3.68087976880318	0.0716706630821718	0.00727093683442323	Uncontrolled_empirical
135	2	-3.68087976880318	0.0567240990514837	0.0117360204934104	Uncontrolled_empirical
180	2	-3.68087976880318	0.0122448994307941	0.00612244971539703	Uncontrolled_empirical
225	2	-3.68087976880318	0	0.00515795421228654	Uncontrolled_empirical
270	2	-3.68087976880318	0	0.00462000806744684	Uncontrolled_empirical
315	2	-3.68087976880318	0	0	Uncontrolled_empirical
0	2	-2.352966649261	0.0759053845351876	0.0669165889981259	Uncontrolled_empirical
45	2	-2.352966649261	0.20659204216645	0.0506483716279039	Uncontrolled_empirical
90	2	-2.352966649261	0.184889536646762	0.0664771367718695	Uncontrolled_empirical
135	2	-2.352966649261	0.174084303985588	0.0430320751425048	Uncontrolled_empirical
180	2	-2.352966649261	0.0632653137257693	0.0285714320051861	Uncontrolled_empirical
225	2	-2.352966649261	0.00515795421228654	0.048140905981341	Uncontrolled_empirical
270	2	-2.352966649261	0.00231000403372342	0.071610125045426	Uncontrolled_empirical
315	2	-2.352966649261	0.00320451623401632	0.0416587110422121	Uncontrolled_empirical
0	2	-1.02505352971882	0.31760410897618	0.203746032173398	Uncontrolled_empirical
45	2	-1.02505352971882	0.279232469895944	0.183267134179916	Uncontrolled_empirical
90	2	-1.02505352971882	0.198392705053548	0.184889536646762	Uncontrolled_empirical
135	2	-1.02505352971882	0.211248368881387	0.228852399621503	Uncontrolled_empirical
180	2	-1.02505352971882	0.18571430803371	0.191836757749107	Uncontrolled_empirical
225	2	-1.02505352971882	0.085965903538109	0.199440896208413	Uncontrolled_empirical
270	2	-1.02505352971882	0.0231000403372342	0.166320290428086	Uncontrolled_empirical
315	2	-1.02505352971882	0.161828069817824	0.20028226462602	Uncontrolled_empirical
0	2	0.302859589823361	0.297629007782709	0.285643947066627	Uncontrolled_empirical
45	2	0.302859589823361	0.179268578525081	0.277233192068527	Uncontrolled_empirical
90	2	0.302859589823361	0.162038020881432	0.29187617863899	Uncontrolled_empirical
135	2	0.302859589823361	0.18386432106343	0.264060461101734	Uncontrolled_empirical
180	2	0.302859589823361	0.293877586339057	0.31020411891345	Uncontrolled_empirical
225	2	0.302859589823361	0.331828387657101	0.292284072029571	Uncontrolled_empirical
270	2	0.302859589823361	0.258720451777023	0.300300524384045	Uncontrolled_empirical
315	2	0.302859589823361	0.414984852305113	0.275588396125403	Uncontrolled_empirical
0	2	1.63077270936554	0.0519352631030231	0.166792094965478	Uncontrolled_empirical
45	2	1.63077270936554	0.0279898895838416	0.195262801144419	Uncontrolled_empirical
90	2	1.63077270936554	0.0862125367510183	0.165154136667613	Uncontrolled_empirical
135	2	1.63077270936554	0.109536191271831	0.154524269829904	Uncontrolled_empirical
180	2	1.63077270936554	0.177551041746514	0.189795941177308	Uncontrolled_empirical
225	2	1.63077270936554	0.287126117817284	0.168493170934694	Uncontrolled_empirical
270	2	1.63077270936554	0.318780556653832	0.16863029446181	Uncontrolled_empirical
315	2	1.63077270936554	0.153816779232783	0.197077748392004	Uncontrolled_empirical
0	2	2.95868582890772	0.00399502023869408	0.024968876491838	Uncontrolled_empirical
45	2	2.95868582890772	0.00533140753977936	0.033321297123621	Uncontrolled_empirical
90	2	2.95868582890772	0.0311611578618138	0.0373933894341766	Uncontrolled_empirical
135	2	2.95868582890772	0.0156480273245472	0.0469440819736416	Uncontrolled_empirical
180	2	2.95868582890772	0.0183673491461911	0.0244897988615881	Uncontrolled_empirical
225	2	2.95868582890772	0.0429829517690545	0.0326670433444814	Uncontrolled_empirical
270	2	2.95868582890772	0.143220250090852	0.0392700685732981	Uncontrolled_empirical
315	2	2.95868582890772	0.0192270974040979	0.0368519366911877	Uncontrolled_empirical
0	2	4.2865989484499	0	0.000998755059673521	Uncontrolled_empirical
45	2	4.2865989484499	0	0.00066642594247242	Uncontrolled_empirical
90	2	4.2865989484499	0.00830964209648369	0	Uncontrolled_empirical
135	2	4.2865989484499	0	0.0039120068311368	Uncontrolled_empirical
180	2	4.2865989484499	0.00204081657179901	0.00204081657179901	Uncontrolled_empirical
225	2	4.2865989484499	0	0.00687727228304872	Uncontrolled_empirical
270	2	4.2865989484499	0.00693001210117026	0.00231000403372342	Uncontrolled_empirical
315	2	4.2865989484499	0	0.00160225811700816	Uncontrolled_empirical
0	2	5.61451206799209	0	0	Uncontrolled_empirical
45	2	5.61451206799209	0	0	Uncontrolled_empirical
90	2	5.61451206799209	0.00103870526206046	0	Uncontrolled_empirical
135	2	5.61451206799209	0	0	Uncontrolled_empirical
180	2	5.61451206799209	0	0	Uncontrolled_empirical
225	2	5.61451206799209	0	0	Uncontrolled_empirical
270	2	5.61451206799209	0	0	Uncontrolled_empirical
315	2	5.61451206799209	0	0	Uncontrolled_empirical
0	2	6.94242518753427	0	0	Uncontrolled_empirical
45	2	6.94242518753427	0	0	Uncontrolled_empirical
90	2	6.94242518753427	0	0	Uncontrolled_empirical
135	2	6.94242518753427	0	0	Uncontrolled_empirical
180	2	6.94242518753427	0	0	Uncontrolled_empirical
225	2	6.94242518753427	0	0	Uncontrolled_empirical
270	2	6.94242518753427	0	0	Uncontrolled_empirical
315	2	6.94242518753427	0	0	Uncontrolled_empirical
0	2	8.27033830707645	0	0	Uncontrolled_empirical
45	2	8.27033830707645	0	0	Uncontrolled_empirical
90	2	8.27033830707645	0	0	Uncontrolled_empirical
135	2	8.27033830707645	0	0	Uncontrolled_empirical
180	2	8.27033830707645	0	0	Uncontrolled_empirical
225	2	8.27033830707645	0	0	Uncontrolled_empirical
270	2	8.27033830707645	0	0	Uncontrolled_empirical
315	2	8.27033830707645	0	0	Uncontrolled_empirical
0	2	9.59825142661863	0	0	Uncontrolled_empirical
45	2	9.59825142661863	0	0	Uncontrolled_empirical
90	2	9.59825142661863	0	0	Uncontrolled_empirical
135	2	9.59825142661863	0	0	Uncontrolled_empirical
180	2	9.59825142661863	0	0	Uncontrolled_empirical
225	2	9.59825142661863	0	0	Uncontrolled_empirical
270	2	9.59825142661863	0	0	Uncontrolled_empirical
315	2	9.59825142661863	0	0	Uncontrolled_empirical
0	2	10.9261645461608	0	0	Uncontrolled_empirical
45	2	10.9261645461608	0	0	Uncontrolled_empirical
90	2	10.9261645461608	0	0	Uncontrolled_empirical
135	2	10.9261645461608	0	0	Uncontrolled_empirical
180	2	10.9261645461608	0	0	Uncontrolled_empirical
225	2	10.9261645461608	0	0	Uncontrolled_empirical
270	2	10.9261645461608	0	0	Uncontrolled_empirical
315	2	10.9261645461608	0	0	Uncontrolled_empirical
0	2	12.254077665703	0	0	Uncontrolled_empirical
45	2	12.254077665703	0	0	Uncontrolled_empirical
90	2	12.254077665703	0	0	Uncontrolled_empirical
135	2	12.254077665703	0	0	Uncontrolled_empirical
180	2	12.254077665703	0	0	Uncontrolled_empirical
225	2	12.254077665703	0	0	Uncontrolled_empirical
270	2	12.254077665703	0	0	Uncontrolled_empirical
315	2	12.254077665703	0	0	Uncontrolled_empirical
0	2	13.5819907852452	0	0	Uncontrolled_empirical
45	2	13.5819907852452	0	0	Uncontrolled_empirical
90	2	13.5819907852452	0	0	Uncontrolled_empirical
135	2	13.5819907852452	0	0	Uncontrolled_empirical
180	2	13.5819907852452	0	0	Uncontrolled_empirical
225	2	13.5819907852452	0	0	Uncontrolled_empirical
270	2	13.5819907852452	0	0	Uncontrolled_empirical
315	2	13.5819907852452	0	0	Uncontrolled_empirical
0	2	14.9099039047874	0	0	Uncontrolled_empirical
45	2	14.9099039047874	0	0	Uncontrolled_empirical
90	2	14.9099039047874	0	0	Uncontrolled_empirical
135	2	14.9099039047874	0	0	Uncontrolled_empirical
180	2	14.9099039047874	0	0	Uncontrolled_empirical
225	2	14.9099039047874	0	0	Uncontrolled_empirical
270	2	14.9099039047874	0	0	Uncontrolled_empirical
315	2	14.9099039047874	0	0	Uncontrolled_empirical
0	2	16.2378170243295	0	0	Uncontrolled_empirical
45	2	16.2378170243295	0	0	Uncontrolled_empirical
90	2	16.2378170243295	0	0	Uncontrolled_empirical
135	2	16.2378170243295	0	0	Uncontrolled_empirical
180	2	16.2378170243295	0	0	Uncontrolled_empirical
225	2	16.2378170243295	0	0	Uncontrolled_empirical
270	2	16.2378170243295	0	0	Uncontrolled_empirical
315	2	16.2378170243295	0	0	Uncontrolled_empirical
0	3	-11.6483584860563	0	0	Uncontrolled_empirical
45	3	-11.6483584860563	0	0	Uncontrolled_empirical
90	3	-11.6483584860563	0	0	Uncontrolled_empirical
135	3	-11.6483584860563	0	0	Uncontrolled_empirical
180	3	-11.6483584860563	0	0	Uncontrolled_empirical
225	3	-11.6483584860563	0	0	Uncontrolled_empirical
270	3	-11.6483584860563	0	0	Uncontrolled_empirical
315	3	-11.6483584860563	0	0	Uncontrolled_empirical
0	3	-10.3204453665141	0	0	Uncontrolled_empirical
45	3	-10.3204453665141	0	0	Uncontrolled_empirical
90	3	-10.3204453665141	0	0	Uncontrolled_empirical
135	3	-10.3204453665141	0	0	Uncontrolled_empirical
180	3	-10.3204453665141	0	0	Uncontrolled_empirical
225	3	-10.3204453665141	0	0	Uncontrolled_empirical
270	3	-10.3204453665141	0	0	Uncontrolled_empirical
315	3	-10.3204453665141	0	0	Uncontrolled_empirical
0	3	-8.9925322469719	0	0	Uncontrolled_empirical
45	3	-8.9925322469719	0	0.00066642594247242	Uncontrolled_empirical
90	3	-8.9925322469719	0	0	Uncontrolled_empirical
135	3	-8.9925322469719	0	0	Uncontrolled_empirical
180	3	-8.9925322469719	0	0	Uncontrolled_empirical
225	3	-8.9925322469719	0	0	Uncontrolled_empirical
270	3	-8.9925322469719	0	0	Uncontrolled_empirical
315	3	-8.9925322469719	0	0	Uncontrolled_empirical
0	3	-7.66461912742972	0	0	Uncontrolled_empirical
45	3	-7.66461912742972	0.00066642594247242	0	Uncontrolled_empirical
90	3	-7.66461912742972	0	0	Uncontrolled_empirical
135	3	-7.66461912742972	0	0	Uncontrolled_empirical
180	3	-7.66461912742972	0	0	Uncontrolled_empirical
225	3	-7.66461912742972	0	0	Uncontrolled_empirical
270	3	-7.66461912742972	0	0	Uncontrolled_empirical
315	3	-7.66461912742972	0	0	Uncontrolled_empirical
0	3	-6.33670600788754	0.000998755059673521	0	Uncontrolled_empirical
45	3	-6.33670600788754	0.00199927782741726	0.00066642594247242	Uncontrolled_empirical
90	3	-6.33670600788754	0.00207741052412092	0.00415482104824185	Uncontrolled_empirical
135	3	-6.33670600788754	0.0019560034155684	0.0019560034155684	Uncontrolled_empirical
180	3	-6.33670600788754	0	0.00204081657179901	Uncontrolled_empirical
225	3	-6.33670600788754	0	0.00343863614152436	Uncontrolled_empirical
270	3	-6.33670600788754	0	0	Uncontrolled_empirical
315	3	-6.33670600788754	0	0	Uncontrolled_empirical
0	3	-5.00879288834536	0.00199751011934704	0.00299626517902056	Uncontrolled_empirical
45	3	-5.00879288834536	0.00266570376988968	0.00133285188494484	Uncontrolled_empirical
90	3	-5.00879288834536	0.00103870526206046	0.00311611578618139	Uncontrolled_empirical
135	3	-5.00879288834536	0.0039120068311368	0.0019560034155684	Uncontrolled_empirical
180	3	-5.00879288834536	0.00408163314359802	0.00612244971539703	Uncontrolled_empirical
225	3	-5.00879288834536	0	0.00171931807076218	Uncontrolled_empirical
270	3	-5.00879288834536	0	0.00231000403372342	Uncontrolled_empirical
315	3	-5.00879288834536	0.00160225811700816	0	Uncontrolled_empirical
0	3	-3.68087976880318	0.00399502023869408	0.0049937752983676	Uncontrolled_empirical
45	3	-3.68087976880318	0.0173270745042829	0.0099963891370863	Uncontrolled_empirical
90	3	-3.68087976880318	0.0311611578618139	0.00830964209648369	Uncontrolled_empirical
135	3	-3.68087976880318	0.0117360204934104	0.0156480273245472	Uncontrolled_empirical
180	3	-3.68087976880318	0.0142857160025931	0.0102040828589951	Uncontrolled_empirical
225	3	-3.68087976880318	0	0.0137545445660974	Uncontrolled_empirical
270	3	-3.68087976880318	0	0.0138600242023405	Uncontrolled_empirical
315	3	-3.68087976880318	0	0.00320451623401632	Uncontrolled_empirical
0	3	-2.352966649261	0.0329589169692262	0.0319601619095527	Uncontrolled_empirical
45	3	-2.352966649261	0.0699747239596041	0.0513147975703764	Uncontrolled_empirical
90	3	-2.352966649261	0.124644631447255	0.0612836104615672	Uncontrolled_empirical
135	3	-2.352966649261	0.0743281297915993	0.0645481127137573	Uncontrolled_empirical
180	3	-2.352966649261	0.0489795977231762	0.0428571480077792	Uncontrolled_empirical
225	3	-2.352966649261	0.0223511349199083	0.0361056794860058	Uncontrolled_empirical
270	3	-2.352966649261	0.0323400564721279	0.0646801129442557	Uncontrolled_empirical
315	3	-2.352966649261	0.0144203230530734	0.0544767759782774	Uncontrolled_empirical
0	3	-1.02505352971882	0.203746032173398	0.198752256875031	Uncontrolled_empirical
45	3	-1.02505352971882	0.268569654816385	0.20659204216645	Uncontrolled_empirical
90	3	-1.02505352971882	0.279411715494264	0.228515157653302	Uncontrolled_empirical
135	3	-1.02505352971882	0.185820324478998	0.197556344972409	Uncontrolled_empirical
180	3	-1.02505352971882	0.120408177736142	0.238775538900484	Uncontrolled_empirical
225	3	-1.02505352971882	0.187405669713078	0.211476122703748	Uncontrolled_empirical
270	3	-1.02505352971882	0.18942033076532	0.247170431608406	Uncontrolled_empirical
315	3	-1.02505352971882	0.161828069817824	0.216304845796101	Uncontrolled_empirical
0	3	0.302859589823361	0.398503268809735	0.348565515826059	Uncontrolled_empirical
45	3	0.302859589823361	0.308555211364731	0.303223803824951	Uncontrolled_empirical
90	3	0.302859589823361	0.251366673418632	0.308495462831957	Uncontrolled_empirical
135	3	0.302859589823361	0.254280444023892	0.320784560153218	Uncontrolled_empirical
180	3	0.302859589823361	0.265306154333871	0.302040852626253	Uncontrolled_empirical
225	3	0.302859589823361	0.309477252737192	0.321512479232528	Uncontrolled_empirical
270	3	0.302859589823361	0.339570592957343	0.300300524384045	Uncontrolled_empirical
315	3	0.302859589823361	0.384541948081958	0.317247107167616	Uncontrolled_empirical
0	3	1.63077270936554	0.10786554644474	0.140824463413966	Uncontrolled_empirical
45	3	1.63077270936554	0.0826368168665801	0.14861298517135	Uncontrolled_empirical
90	3	1.63077270936554	0.0592061999374463	0.111141463040469	Uncontrolled_empirical
135	3	1.63077270936554	0.189732331310135	0.119316208349673	Uncontrolled_empirical
180	3	1.63077270936554	0.228571456041489	0.134693893738735	Uncontrolled_empirical
225	3	1.63077270936554	0.185686351642315	0.139264763731737	Uncontrolled_empirical
270	3	1.63077270936554	0.173250302529256	0.099330173450107	Uncontrolled_empirical
315	3	1.63077270936554	0.181055167221922	0.142600972413726	Uncontrolled_empirical
0	3	2.95868582890772	0.00299626517902056	0.022971366372491	Uncontrolled_empirical
45	3	2.95868582890772	0.00066642594247242	0.0299891674112589	Uncontrolled_empirical
90	3	2.95868582890772	0.00415482104824185	0.027006336813572	Uncontrolled_empirical
135	3	2.95868582890772	0.0273840478179576	0.029340051233526	Uncontrolled_empirical
180	3	2.95868582890772	0.0612244971539703	0.0122448994307941	Uncontrolled_empirical
225	3	2.95868582890772	0.0343863614152436	0.018912498778384	Uncontrolled_empirical
270	3	2.95868582890772	0.0184800322697874	0.0231000403372342	Uncontrolled_empirical
315	3	2.95868582890772	0.00961354870204895	0.0160225811700816	Uncontrolled_empirical
0	3	4.2865989484499	0	0.00199751011934704	Uncontrolled_empirical
45	3	4.2865989484499	0	0.00066642594247242	Uncontrolled_empirical
90	3	4.2865989484499	0	0.00103870526206046	Uncontrolled_empirical
135	3	4.2865989484499	0.0039120068311368	0.0019560034155684	Uncontrolled_empirical
180	3	4.2865989484499	0.0102040828589951	0.00408163314359802	Uncontrolled_empirical
225	3	4.2865989484499	0.0137545445660974	0.00687727228304872	Uncontrolled_empirical
270	3	4.2865989484499	0	0.00231000403372342	Uncontrolled_empirical
315	3	4.2865989484499	0	0.00320451623401632	Uncontrolled_empirical
0	3	5.61451206799209	0	0	Uncontrolled_empirical
45	3	5.61451206799209	0	0	Uncontrolled_empirical
90	3	5.61451206799209	0	0	Uncontrolled_empirical
135	3	5.61451206799209	0	0	Uncontrolled_empirical
180	3	5.61451206799209	0	0	Uncontrolled_empirical
225	3	5.61451206799209	0	0	Uncontrolled_empirical
270	3	5.61451206799209	0	0	Uncontrolled_empirical
315	3	5.61451206799209	0	0	Uncontrolled_empirical
0	3	6.94242518753427	0	0	Uncontrolled_empirical
45	3	6.94242518753427	0	0	Uncontrolled_empirical
90	3	6.94242518753427	0	0	Uncontrolled_empirical
135	3	6.94242518753427	0	0	Uncontrolled_empirical
180	3	6.94242518753427	0	0	Uncontrolled_empirical
225	3	6.94242518753427	0	0	Uncontrolled_empirical
270	3	6.94242518753427	0	0	Uncontrolled_empirical
315	3	6.94242518753427	0	0	Uncontrolled_empirical
0	3	8.27033830707645	0	0	Uncontrolled_empirical
45	3	8.27033830707645	0	0	Uncontrolled_empirical
90	3	8.27033830707645	0	0	Uncontrolled_empirical
135	3	8.27033830707645	0	0	Uncontrolled_empirical
180	3	8.27033830707645	0	0	Uncontrolled_empirical
225	3	8.27033830707645	0	0	Uncontrolled_empirical
270	3	8.27033830707645	0	0	Uncontrolled_empirical
315	3	8.27033830707645	0	0	Uncontrolled_empirical
0	3	9.59825142661863	0	0	Uncontrolled_empirical
45	3	9.59825142661863	0	0	Uncontrolled_empirical
90	3	9.59825142661863	0	0	Uncontrolled_empirical
135	3	9.59825142661863	0	0	Uncontrolled_empirical
180	3	9.59825142661863	0	0	Uncontrolled_empirical
225	3	9.59825142661863	0	0	Uncontrolled_empirical
270	3	9.59825142661863	0	0	Uncontrolled_empirical
315	3	9.59825142661863	0	0	Uncontrolled_empirical
0	3	10.9261645461608	0	0	Uncontrolled_empirical
45	3	10.9261645461608	0	0	Uncontrolled_empirical
90	3	10.9261645461608	0	0	Uncontrolled_empirical
135	3	10.9261645461608	0	0	Uncontrolled_empirical
180	3	10.9261645461608	0	0	Uncontrolled_empirical
225	3	10.9261645461608	0	0	Uncontrolled_empirical
270	3	10.9261645461608	0	0	Uncontrolled_empirical
315	3	10.9261645461608	0	0	Uncontrolled_empirical
0	3	12.254077665703	0	0	Uncontrolled_empirical
45	3	12.254077665703	0	0	Uncontrolled_empirical
90	3	12.254077665703	0	0	Uncontrolled_empirical
135	3	12.254077665703	0	0	Uncontrolled_empirical
180	3	12.254077665703	0	0	Uncontrolled_empirical
225	3	12.254077665703	0	0	Uncontrolled_empirical
270	3	12.254077665703	0	0	Uncontrolled_empirical
315	3	12.254077665703	0	0	Uncontrolled_empirical
0	3	13.5819907852452	0	0	Uncontrolled_empirical
45	3	13.5819907852452	0	0	Uncontrolled_empirical
90	3	13.5819907852452	0	0	Uncontrolled_empirical
135	3	13.5819907852452	0	0	Uncontrolled_empirical
180	3	13.5819907852452	0	0	Uncontrolled_empirical
225	3	13.5819907852452	0	0	Uncontrolled_empirical
270	3	13.5819907852452	0	0	Uncontrolled_empirical
315	3	13.5819907852452	0	0	Uncontrolled_empirical
0	3	14.9099039047874	0	0	Uncontrolled_empirical
45	3	14.9099039047874	0	0	Uncontrolled_empirical
90	3	14.9099039047874	0	0	Uncontrolled_empirical
135	3	14.9099039047874	0	0	Uncontrolled_empirical
180	3	14.9099039047874	0	0	Uncontrolled_empirical
225	3	14.9099039047874	0	0	Uncontrolled_empirical
270	3	14.9099039047874	0	0	Uncontrolled_empirical
315	3	14.9099039047874	0	0	Uncontrolled_empirical
0	3	16.2378170243295	0	0	Uncontrolled_empirical
45	3	16.2378170243295	0	0	Uncontrolled_empirical
90	3	16.2378170243295	0	0	Uncontrolled_empirical
135	3	16.2378170243295	0	0	Uncontrolled_empirical
180	3	16.2378170243295	0	0	Uncontrolled_empirical
225	3	16.2378170243295	0	0	Uncontrolled_empirical
270	3	16.2378170243295	0	0	Uncontrolled_empirical
315	3	16.2378170243295	0	0	Uncontrolled_empirical
