# Supplementary material for: Constraints on neural redundancy
Source: eLife journal article supplement (doi:10.7554/elife.36774), 2018-08-15
Supplement: supp [file elife-36774-supp-v1.zip › elife_poa_e36774_Figure_4_source_data_1.csv]

target	dimension	bin_center	data	predicted	hypothesisName
0	1	-11.6483584860563	0	0	Persistent_Strategy
45	1	-11.6483584860563	0	0	Persistent_Strategy
90	1	-11.6483584860563	0	0	Persistent_Strategy
135	1	-11.6483584860563	0	0	Persistent_Strategy
180	1	-11.6483584860563	0	0	Persistent_Strategy
225	1	-11.6483584860563	0	0	Persistent_Strategy
270	1	-11.6483584860563	0	0	Persistent_Strategy
315	1	-11.6483584860563	0	0	Persistent_Strategy
0	1	-10.3204453665141	0	0	Persistent_Strategy
45	1	-10.3204453665141	0	0	Persistent_Strategy
90	1	-10.3204453665141	0	0	Persistent_Strategy
135	1	-10.3204453665141	0	0	Persistent_Strategy
180	1	-10.3204453665141	0	0	Persistent_Strategy
225	1	-10.3204453665141	0	0	Persistent_Strategy
270	1	-10.3204453665141	0	0	Persistent_Strategy
315	1	-10.3204453665141	0	0	Persistent_Strategy
0	1	-8.9925322469719	0	0	Persistent_Strategy
45	1	-8.9925322469719	0	0	Persistent_Strategy
90	1	-8.9925322469719	0	0	Persistent_Strategy
135	1	-8.9925322469719	0	0	Persistent_Strategy
180	1	-8.9925322469719	0	0	Persistent_Strategy
225	1	-8.9925322469719	0	0	Persistent_Strategy
270	1	-8.9925322469719	0	0	Persistent_Strategy
315	1	-8.9925322469719	0	0	Persistent_Strategy
0	1	-7.66461912742972	0	0	Persistent_Strategy
45	1	-7.66461912742972	0	0	Persistent_Strategy
90	1	-7.66461912742972	0	0	Persistent_Strategy
135	1	-7.66461912742972	0	0	Persistent_Strategy
180	1	-7.66461912742972	0	0	Persistent_Strategy
225	1	-7.66461912742972	0	0	Persistent_Strategy
270	1	-7.66461912742972	0	0	Persistent_Strategy
315	1	-7.66461912742972	0	0	Persistent_Strategy
0	1	-6.33670600788754	0	0	Persistent_Strategy
45	1	-6.33670600788754	0	0	Persistent_Strategy
90	1	-6.33670600788754	0	0	Persistent_Strategy
135	1	-6.33670600788754	0	0	Persistent_Strategy
180	1	-6.33670600788754	0	0	Persistent_Strategy
225	1	-6.33670600788754	0	0	Persistent_Strategy
270	1	-6.33670600788754	0	0	Persistent_Strategy
315	1	-6.33670600788754	0.00160225811700816	0	Persistent_Strategy
0	1	-5.00879288834536	0.0129838157757558	0.0129838157757558	Persistent_Strategy
45	1	-5.00879288834536	0.00066642594247242	0.00133285188494484	Persistent_Strategy
90	1	-5.00879288834536	0	0	Persistent_Strategy
135	1	-5.00879288834536	0	0	Persistent_Strategy
180	1	-5.00879288834536	0	0	Persistent_Strategy
225	1	-5.00879288834536	0	0	Persistent_Strategy
270	1	-5.00879288834536	0.00462000806744684	0	Persistent_Strategy
315	1	-5.00879288834536	0.0769083896163916	0.0160225811700816	Persistent_Strategy
0	1	-3.68087976880318	0.179775910741234	0.165793339905804	Persistent_Strategy
45	1	-3.68087976880318	0.0273234636413692	0.058645482937573	Persistent_Strategy
90	1	-3.68087976880318	0.00207741052412092	0.0186966947170883	Persistent_Strategy
135	1	-3.68087976880318	0.0019560034155684	0.0039120068311368	Persistent_Strategy
180	1	-3.68087976880318	0	0.00204081657179901	Persistent_Strategy
225	1	-3.68087976880318	0.00515795421228654	0	Persistent_Strategy
270	1	-3.68087976880318	0.0508200887419152	0.00924001613489368	Persistent_Strategy
315	1	-3.68087976880318	0.33967872080573	0.189066457806963	Persistent_Strategy
0	1	-2.352966649261	0.302622783081077	0.314607843797159	Persistent_Strategy
45	1	-2.352966649261	0.16527363373316	0.193929949259474	Persistent_Strategy
90	1	-2.352966649261	0.0332385683859348	0.0695932525580509	Persistent_Strategy
135	1	-2.352966649261	0.0019560034155684	0.0234720409868208	Persistent_Strategy
180	1	-2.352966649261	0.00408163314359802	0.00408163314359802	Persistent_Strategy
225	1	-2.352966649261	0.0343863614152436	0.0120352264953353	Persistent_Strategy
270	1	-2.352966649261	0.17556030656298	0.0531300927756386	Persistent_Strategy
315	1	-2.352966649261	0.227520652615159	0.317247107167616	Persistent_Strategy
0	1	-1.02505352971882	0.166792094965478	0.162797074726784	Persistent_Strategy
45	1	-1.02505352971882	0.249243302484685	0.227917672325568	Persistent_Strategy
90	1	-1.02505352971882	0.131915568281679	0.166192841929674	Persistent_Strategy
135	1	-1.02505352971882	0.00782401366227361	0.0723721263760309	Persistent_Strategy
180	1	-1.02505352971882	0.0265306154333871	0.0183673491461911	Persistent_Strategy
225	1	-1.02505352971882	0.115194310741066	0.0412636336982923	Persistent_Strategy
270	1	-1.02505352971882	0.272580475979363	0.129360225888511	Persistent_Strategy
315	1	-1.02505352971882	0.0817151639674161	0.177850650987906	Persistent_Strategy
0	1	0.302859589823361	0.0699128541771465	0.0689140991174729	Persistent_Strategy
45	1	0.302859589823361	0.193929949259474	0.173270745042829	Persistent_Strategy
90	1	0.302859589823361	0.194237884005306	0.211895873460334	Persistent_Strategy
135	1	0.302859589823361	0.0606361058826205	0.140832245920925	Persistent_Strategy
180	1	0.302859589823361	0.0448979645795782	0.0530612308667743	Persistent_Strategy
225	1	0.302859589823361	0.168493170934694	0.115194310741066	Persistent_Strategy
270	1	0.302859589823361	0.147840258158299	0.166320290428086	Persistent_Strategy
315	1	0.302859589823361	0.0224316136381142	0.0368519366911877	Persistent_Strategy
0	1	1.63077270936554	0.0199751011934704	0.022971366372491	Persistent_Strategy
45	1	1.63077270936554	0.0833032428090525	0.0699747239596041	Persistent_Strategy
90	1	1.63077270936554	0.165154136667613	0.143341326164344	Persistent_Strategy
135	1	1.63077270936554	0.133008232258651	0.117360204934104	Persistent_Strategy
180	1	1.63077270936554	0.10408164516175	0.0693877634411663	Persistent_Strategy
225	1	1.63077270936554	0.190844305854602	0.154738626368596	Persistent_Strategy
270	1	1.63077270936554	0.071610125045426	0.212520371102555	Persistent_Strategy
315	1	1.63077270936554	0.00320451623401632	0.0128180649360653	Persistent_Strategy
0	1	2.95868582890772	0.000998755059673521	0.00399502023869408	Persistent_Strategy
45	1	2.95868582890772	0.0279898895838416	0.0186599263892278	Persistent_Strategy
90	1	2.95868582890772	0.126722041971376	0.0727093683442323	Persistent_Strategy
135	1	2.95868582890772	0.144744252752062	0.138876242505357	Persistent_Strategy
180	1	2.95868582890772	0.167346958887519	0.116326544592544	Persistent_Strategy
225	1	2.95868582890772	0.106597720387255	0.135826127590212	Persistent_Strategy
270	1	2.95868582890772	0.0207900363035108	0.0924001613489368	Persistent_Strategy
315	1	2.95868582890772	0	0.00320451623401632	Persistent_Strategy
0	1	4.2865989484499	0	0	Persistent_Strategy
45	1	4.2865989484499	0.00399855565483452	0.00733068536719662	Persistent_Strategy
90	1	4.2865989484499	0.0592061999374463	0.0311611578618139	Persistent_Strategy
135	1	4.2865989484499	0.150612262998767	0.105624184440694	Persistent_Strategy
180	1	4.2865989484499	0.138775526882333	0.187755124605509	Persistent_Strategy
225	1	4.2865989484499	0.0756499951135359	0.144422717944023	Persistent_Strategy
270	1	4.2865989484499	0.00231000403372342	0.0531300927756386	Persistent_Strategy
315	1	4.2865989484499	0	0	Persistent_Strategy
0	1	5.61451206799209	0	0	Persistent_Strategy
45	1	5.61451206799209	0.00133285188494484	0.00133285188494484	Persistent_Strategy
90	1	5.61451206799209	0.0321998631238743	0.0228515157653302	Persistent_Strategy
135	1	5.61451206799209	0.117360204934104	0.0841081468694413	Persistent_Strategy
180	1	5.61451206799209	0.132653077166936	0.151020426313127	Persistent_Strategy
225	1	5.61451206799209	0.037824997556768	0.0842465854673468	Persistent_Strategy
270	1	5.61451206799209	0.00693001210117026	0.0300300524384044	Persistent_Strategy
315	1	5.61451206799209	0	0	Persistent_Strategy
0	1	6.94242518753427	0	0.000998755059673521	Persistent_Strategy
45	1	6.94242518753427	0	0	Persistent_Strategy
90	1	6.94242518753427	0.00727093683442323	0.013503168406786	Persistent_Strategy
135	1	6.94242518753427	0.0821521434538729	0.0371640648957996	Persistent_Strategy
180	1	6.94242518753427	0.0816326628719604	0.0591836805821713	Persistent_Strategy
225	1	6.94242518753427	0.00687727228304872	0.0343863614152436	Persistent_Strategy
270	1	6.94242518753427	0	0.00231000403372342	Persistent_Strategy
315	1	6.94242518753427	0	0	Persistent_Strategy
0	1	8.27033830707645	0	0	Persistent_Strategy
45	1	8.27033830707645	0	0	Persistent_Strategy
90	1	8.27033830707645	0.00103870526206046	0.00103870526206046	Persistent_Strategy
135	1	8.27033830707645	0.0449880785580732	0.0176040307401156	Persistent_Strategy
180	1	8.27033830707645	0.0306122485769851	0.0530612308667743	Persistent_Strategy
225	1	8.27033830707645	0.0103159084245731	0.0206318168491462	Persistent_Strategy
270	1	8.27033830707645	0	0	Persistent_Strategy
315	1	8.27033830707645	0	0	Persistent_Strategy
0	1	9.59825142661863	0	0	Persistent_Strategy
45	1	9.59825142661863	0	0.00066642594247242	Persistent_Strategy
90	1	9.59825142661863	0	0	Persistent_Strategy
135	1	9.59825142661863	0.00586801024670521	0.00978001707784201	Persistent_Strategy
180	1	9.59825142661863	0.0163265325743921	0.0244897988615881	Persistent_Strategy
225	1	9.59825142661863	0.00171931807076218	0.00687727228304872	Persistent_Strategy
270	1	9.59825142661863	0	0.00231000403372342	Persistent_Strategy
315	1	9.59825142661863	0	0	Persistent_Strategy
0	1	10.9261645461608	0	0	Persistent_Strategy
45	1	10.9261645461608	0	0	Persistent_Strategy
90	1	10.9261645461608	0	0.00207741052412092	Persistent_Strategy
135	1	10.9261645461608	0.0019560034155684	0.0019560034155684	Persistent_Strategy
180	1	10.9261645461608	0.00204081657179901	0.0142857160025931	Persistent_Strategy
225	1	10.9261645461608	0	0.00343863614152436	Persistent_Strategy
270	1	10.9261645461608	0	0.00231000403372342	Persistent_Strategy
315	1	10.9261645461608	0	0	Persistent_Strategy
0	1	12.254077665703	0	0	Persistent_Strategy
45	1	12.254077665703	0	0	Persistent_Strategy
90	1	12.254077665703	0	0	Persistent_Strategy
135	1	12.254077665703	0	0	Persistent_Strategy
180	1	12.254077665703	0.00204081657179901	0	Persistent_Strategy
225	1	12.254077665703	0	0	Persistent_Strategy
270	1	12.254077665703	0	0	Persistent_Strategy
315	1	12.254077665703	0	0	Persistent_Strategy
0	1	13.5819907852452	0	0	Persistent_Strategy
45	1	13.5819907852452	0	0	Persistent_Strategy
90	1	13.5819907852452	0	0	Persistent_Strategy
135	1	13.5819907852452	0	0	Persistent_Strategy
180	1	13.5819907852452	0.00204081657179901	0	Persistent_Strategy
225	1	13.5819907852452	0	0	Persistent_Strategy
270	1	13.5819907852452	0	0	Persistent_Strategy
315	1	13.5819907852452	0	0	Persistent_Strategy
0	1	14.9099039047874	0	0	Persistent_Strategy
45	1	14.9099039047874	0	0	Persistent_Strategy
90	1	14.9099039047874	0	0	Persistent_Strategy
135	1	14.9099039047874	0	0	Persistent_Strategy
180	1	14.9099039047874	0	0	Persistent_Strategy
225	1	14.9099039047874	0	0	Persistent_Strategy
270	1	14.9099039047874	0	0	Persistent_Strategy
315	1	14.9099039047874	0	0	Persistent_Strategy
0	1	16.2378170243295	0	0	Persistent_Strategy
45	1	16.2378170243295	0	0	Persistent_Strategy
90	1	16.2378170243295	0	0	Persistent_Strategy
135	1	16.2378170243295	0	0	Persistent_Strategy
180	1	16.2378170243295	0	0	Persistent_Strategy
225	1	16.2378170243295	0	0	Persistent_Strategy
270	1	16.2378170243295	0	0	Persistent_Strategy
315	1	16.2378170243295	0	0	Persistent_Strategy
0	2	-11.6483584860563	0	0	Persistent_Strategy
45	2	-11.6483584860563	0	0	Persistent_Strategy
90	2	-11.6483584860563	0	0	Persistent_Strategy
135	2	-11.6483584860563	0	0	Persistent_Strategy
180	2	-11.6483584860563	0	0	Persistent_Strategy
225	2	-11.6483584860563	0	0	Persistent_Strategy
270	2	-11.6483584860563	0	0	Persistent_Strategy
315	2	-11.6483584860563	0	0	Persistent_Strategy
0	2	-10.3204453665141	0	0	Persistent_Strategy
45	2	-10.3204453665141	0	0	Persistent_Strategy
90	2	-10.3204453665141	0	0	Persistent_Strategy
135	2	-10.3204453665141	0	0	Persistent_Strategy
180	2	-10.3204453665141	0	0	Persistent_Strategy
225	2	-10.3204453665141	0	0	Persistent_Strategy
270	2	-10.3204453665141	0	0	Persistent_Strategy
315	2	-10.3204453665141	0	0	Persistent_Strategy
0	2	-8.9925322469719	0	0	Persistent_Strategy
45	2	-8.9925322469719	0	0	Persistent_Strategy
90	2	-8.9925322469719	0	0	Persistent_Strategy
135	2	-8.9925322469719	0	0	Persistent_Strategy
180	2	-8.9925322469719	0	0	Persistent_Strategy
225	2	-8.9925322469719	0	0	Persistent_Strategy
270	2	-8.9925322469719	0	0	Persistent_Strategy
315	2	-8.9925322469719	0	0	Persistent_Strategy
0	2	-7.66461912742972	0	0	Persistent_Strategy
45	2	-7.66461912742972	0	0	Persistent_Strategy
90	2	-7.66461912742972	0	0	Persistent_Strategy
135	2	-7.66461912742972	0	0	Persistent_Strategy
180	2	-7.66461912742972	0	0	Persistent_Strategy
225	2	-7.66461912742972	0	0	Persistent_Strategy
270	2	-7.66461912742972	0	0	Persistent_Strategy
315	2	-7.66461912742972	0	0	Persistent_Strategy
0	2	-6.33670600788754	0	0	Persistent_Strategy
45	2	-6.33670600788754	0	0	Persistent_Strategy
90	2	-6.33670600788754	0	0	Persistent_Strategy
135	2	-6.33670600788754	0	0	Persistent_Strategy
180	2	-6.33670600788754	0	0	Persistent_Strategy
225	2	-6.33670600788754	0	0	Persistent_Strategy
270	2	-6.33670600788754	0	0	Persistent_Strategy
315	2	-6.33670600788754	0	0	Persistent_Strategy
0	2	-5.00879288834536	0	0	Persistent_Strategy
45	2	-5.00879288834536	0.00466498159730694	0	Persistent_Strategy
90	2	-5.00879288834536	0.00934834735854415	0	Persistent_Strategy
135	2	-5.00879288834536	0.0019560034155684	0	Persistent_Strategy
180	2	-5.00879288834536	0	0	Persistent_Strategy
225	2	-5.00879288834536	0	0	Persistent_Strategy
270	2	-5.00879288834536	0	0	Persistent_Strategy
315	2	-5.00879288834536	0	0	Persistent_Strategy
0	2	-3.68087976880318	0.00599253035804113	0.00199751011934704	Persistent_Strategy
45	2	-3.68087976880318	0.0499819456854315	0.0106628150795587	Persistent_Strategy
90	2	-3.68087976880318	0.0716706630821718	0.0207741052412092	Persistent_Strategy
135	2	-3.68087976880318	0.0567240990514837	0.0352080614802312	Persistent_Strategy
180	2	-3.68087976880318	0.0122448994307941	0.00408163314359802	Persistent_Strategy
225	2	-3.68087976880318	0	0.00171931807076218	Persistent_Strategy
270	2	-3.68087976880318	0	0	Persistent_Strategy
315	2	-3.68087976880318	0	0.00160225811700816	Persistent_Strategy
0	2	-2.352966649261	0.0759053845351876	0.0449439776853084	Persistent_Strategy
45	2	-2.352966649261	0.20659204216645	0.117957391817618	Persistent_Strategy
90	2	-2.352966649261	0.184889536646762	0.132954273543739	Persistent_Strategy
135	2	-2.352966649261	0.174084303985588	0.138876242505357	Persistent_Strategy
180	2	-2.352966649261	0.0632653137257693	0.0551020474385733	Persistent_Strategy
225	2	-2.352966649261	0.00515795421228654	0.0137545445660974	Persistent_Strategy
270	2	-2.352966649261	0.00231000403372342	0.00924001613489368	Persistent_Strategy
315	2	-2.352966649261	0.00320451623401632	0.00961354870204895	Persistent_Strategy
0	2	-1.02505352971882	0.31760410897618	0.260675070574789	Persistent_Strategy
45	2	-1.02505352971882	0.279232469895944	0.326548711811486	Persistent_Strategy
90	2	-1.02505352971882	0.198392705053548	0.293953589163111	Persistent_Strategy
135	2	-1.02505352971882	0.211248368881387	0.252324440608324	Persistent_Strategy
180	2	-1.02505352971882	0.18571430803371	0.16530614231572	Persistent_Strategy
225	2	-1.02505352971882	0.085965903538109	0.108317038458017	Persistent_Strategy
270	2	-1.02505352971882	0.0231000403372342	0.0623701089105323	Persistent_Strategy
315	2	-1.02505352971882	0.161828069817824	0.0688970990313508	Persistent_Strategy
0	2	0.302859589823361	0.297629007782709	0.299626517902056	Persistent_Strategy
45	2	0.302859589823361	0.179268578525081	0.235914783635237	Persistent_Strategy
90	2	0.302859589823361	0.162038020881432	0.234747389225664	Persistent_Strategy
135	2	0.302859589823361	0.18386432106343	0.234720409868208	Persistent_Strategy
180	2	0.302859589823361	0.293877586339057	0.300000036054454	Persistent_Strategy
225	2	0.302859589823361	0.331828387657101	0.302599980454144	Persistent_Strategy
270	2	0.302859589823361	0.258720451777023	0.291060508249151	Persistent_Strategy
315	2	0.302859589823361	0.414984852305113	0.283599686710444	Persistent_Strategy
0	2	1.63077270936554	0.0519352631030231	0.133833177996252	Persistent_Strategy
45	2	1.63077270936554	0.0279898895838416	0.0566462051101557	Persistent_Strategy
90	2	1.63077270936554	0.0862125367510183	0.0571287894133254	Persistent_Strategy
135	2	1.63077270936554	0.109536191271831	0.0782401366227361	Persistent_Strategy
180	2	1.63077270936554	0.177551041746514	0.193877574320906	Persistent_Strategy
225	2	1.63077270936554	0.287126117817284	0.266494300968138	Persistent_Strategy
270	2	1.63077270936554	0.318780556653832	0.304920532451491	Persistent_Strategy
315	2	1.63077270936554	0.153816779232783	0.296417751646509	Persistent_Strategy
0	2	2.95868582890772	0.00399502023869408	0.0119850607160823	Persistent_Strategy
45	2	2.95868582890772	0.00533140753977936	0.00533140753977936	Persistent_Strategy
90	2	2.95868582890772	0.0311611578618138	0.013503168406786	Persistent_Strategy
135	2	2.95868582890772	0.0156480273245472	0.0117360204934104	Persistent_Strategy
180	2	2.95868582890772	0.0183673491461911	0.0326530651487842	Persistent_Strategy
225	2	2.95868582890772	0.0429829517690545	0.0601761324766763	Persistent_Strategy
270	2	2.95868582890772	0.143220250090852	0.0739201290791494	Persistent_Strategy
315	2	2.95868582890772	0.0192270974040979	0.0929309707864732	Persistent_Strategy
0	2	4.2865989484499	0	0	Persistent_Strategy
45	2	4.2865989484499	0	0	Persistent_Strategy
90	2	4.2865989484499	0.00830964209648369	0	Persistent_Strategy
135	2	4.2865989484499	0	0.0019560034155684	Persistent_Strategy
180	2	4.2865989484499	0.00204081657179901	0.00204081657179901	Persistent_Strategy
225	2	4.2865989484499	0	0	Persistent_Strategy
270	2	4.2865989484499	0.00693001210117026	0.0115500201686171	Persistent_Strategy
315	2	4.2865989484499	0	0	Persistent_Strategy
0	2	5.61451206799209	0	0	Persistent_Strategy
45	2	5.61451206799209	0	0	Persistent_Strategy
90	2	5.61451206799209	0.00103870526206046	0	Persistent_Strategy
135	2	5.61451206799209	0	0	Persistent_Strategy
180	2	5.61451206799209	0	0	Persistent_Strategy
225	2	5.61451206799209	0	0	Persistent_Strategy
270	2	5.61451206799209	0	0	Persistent_Strategy
315	2	5.61451206799209	0	0	Persistent_Strategy
0	2	6.94242518753427	0	0	Persistent_Strategy
45	2	6.94242518753427	0	0	Persistent_Strategy
90	2	6.94242518753427	0	0	Persistent_Strategy
135	2	6.94242518753427	0	0	Persistent_Strategy
180	2	6.94242518753427	0	0	Persistent_Strategy
225	2	6.94242518753427	0	0	Persistent_Strategy
270	2	6.94242518753427	0	0	Persistent_Strategy
315	2	6.94242518753427	0	0	Persistent_Strategy
0	2	8.27033830707645	0	0	Persistent_Strategy
45	2	8.27033830707645	0	0	Persistent_Strategy
90	2	8.27033830707645	0	0	Persistent_Strategy
135	2	8.27033830707645	0	0	Persistent_Strategy
180	2	8.27033830707645	0	0	Persistent_Strategy
225	2	8.27033830707645	0	0	Persistent_Strategy
270	2	8.27033830707645	0	0	Persistent_Strategy
315	2	8.27033830707645	0	0	Persistent_Strategy
0	2	9.59825142661863	0	0	Persistent_Strategy
45	2	9.59825142661863	0	0	Persistent_Strategy
90	2	9.59825142661863	0	0	Persistent_Strategy
135	2	9.59825142661863	0	0	Persistent_Strategy
180	2	9.59825142661863	0	0	Persistent_Strategy
225	2	9.59825142661863	0	0	Persistent_Strategy
270	2	9.59825142661863	0	0	Persistent_Strategy
315	2	9.59825142661863	0	0	Persistent_Strategy
0	2	10.9261645461608	0	0	Persistent_Strategy
45	2	10.9261645461608	0	0	Persistent_Strategy
90	2	10.9261645461608	0	0	Persistent_Strategy
135	2	10.9261645461608	0	0	Persistent_Strategy
180	2	10.9261645461608	0	0	Persistent_Strategy
225	2	10.9261645461608	0	0	Persistent_Strategy
270	2	10.9261645461608	0	0	Persistent_Strategy
315	2	10.9261645461608	0	0	Persistent_Strategy
0	2	12.254077665703	0	0	Persistent_Strategy
45	2	12.254077665703	0	0	Persistent_Strategy
90	2	12.254077665703	0	0	Persistent_Strategy
135	2	12.254077665703	0	0	Persistent_Strategy
180	2	12.254077665703	0	0	Persistent_Strategy
225	2	12.254077665703	0	0	Persistent_Strategy
270	2	12.254077665703	0	0	Persistent_Strategy
315	2	12.254077665703	0	0	Persistent_Strategy
0	2	13.5819907852452	0	0	Persistent_Strategy
45	2	13.5819907852452	0	0	Persistent_Strategy
90	2	13.5819907852452	0	0	Persistent_Strategy
135	2	13.5819907852452	0	0	Persistent_Strategy
180	2	13.5819907852452	0	0	Persistent_Strategy
225	2	13.5819907852452	0	0	Persistent_Strategy
270	2	13.5819907852452	0	0	Persistent_Strategy
315	2	13.5819907852452	0	0	Persistent_Strategy
0	2	14.9099039047874	0	0	Persistent_Strategy
45	2	14.9099039047874	0	0	Persistent_Strategy
90	2	14.9099039047874	0	0	Persistent_Strategy
135	2	14.9099039047874	0	0	Persistent_Strategy
180	2	14.9099039047874	0	0	Persistent_Strategy
225	2	14.9099039047874	0	0	Persistent_Strategy
270	2	14.9099039047874	0	0	Persistent_Strategy
315	2	14.9099039047874	0	0	Persistent_Strategy
0	2	16.2378170243295	0	0	Persistent_Strategy
45	2	16.2378170243295	0	0	Persistent_Strategy
90	2	16.2378170243295	0	0	Persistent_Strategy
135	2	16.2378170243295	0	0	Persistent_Strategy
180	2	16.2378170243295	0	0	Persistent_Strategy
225	2	16.2378170243295	0	0	Persistent_Strategy
270	2	16.2378170243295	0	0	Persistent_Strategy
315	2	16.2378170243295	0	0	Persistent_Strategy
0	3	-11.6483584860563	0	0	Persistent_Strategy
45	3	-11.6483584860563	0	0	Persistent_Strategy
90	3	-11.6483584860563	0	0	Persistent_Strategy
135	3	-11.6483584860563	0	0	Persistent_Strategy
180	3	-11.6483584860563	0	0	Persistent_Strategy
225	3	-11.6483584860563	0	0	Persistent_Strategy
270	3	-11.6483584860563	0	0	Persistent_Strategy
315	3	-11.6483584860563	0	0	Persistent_Strategy
0	3	-10.3204453665141	0	0	Persistent_Strategy
45	3	-10.3204453665141	0	0	Persistent_Strategy
90	3	-10.3204453665141	0	0	Persistent_Strategy
135	3	-10.3204453665141	0	0	Persistent_Strategy
180	3	-10.3204453665141	0	0	Persistent_Strategy
225	3	-10.3204453665141	0	0	Persistent_Strategy
270	3	-10.3204453665141	0	0	Persistent_Strategy
315	3	-10.3204453665141	0	0	Persistent_Strategy
0	3	-8.9925322469719	0	0	Persistent_Strategy
45	3	-8.9925322469719	0	0	Persistent_Strategy
90	3	-8.9925322469719	0	0	Persistent_Strategy
135	3	-8.9925322469719	0	0	Persistent_Strategy
180	3	-8.9925322469719	0	0	Persistent_Strategy
225	3	-8.9925322469719	0	0	Persistent_Strategy
270	3	-8.9925322469719	0	0	Persistent_Strategy
315	3	-8.9925322469719	0	0	Persistent_Strategy
0	3	-7.66461912742972	0	0	Persistent_Strategy
45	3	-7.66461912742972	0.00066642594247242	0	Persistent_Strategy
90	3	-7.66461912742972	0	0	Persistent_Strategy
135	3	-7.66461912742972	0	0	Persistent_Strategy
180	3	-7.66461912742972	0	0	Persistent_Strategy
225	3	-7.66461912742972	0	0	Persistent_Strategy
270	3	-7.66461912742972	0	0	Persistent_Strategy
315	3	-7.66461912742972	0	0	Persistent_Strategy
0	3	-6.33670600788754	0.000998755059673521	0	Persistent_Strategy
45	3	-6.33670600788754	0.00199927782741726	0.00133285188494484	Persistent_Strategy
90	3	-6.33670600788754	0.00207741052412092	0.00311611578618139	Persistent_Strategy
135	3	-6.33670600788754	0.0019560034155684	0.0019560034155684	Persistent_Strategy
180	3	-6.33670600788754	0	0	Persistent_Strategy
225	3	-6.33670600788754	0	0	Persistent_Strategy
270	3	-6.33670600788754	0	0	Persistent_Strategy
315	3	-6.33670600788754	0	0	Persistent_Strategy
0	3	-5.00879288834536	0.00199751011934704	0.00199751011934704	Persistent_Strategy
45	3	-5.00879288834536	0.00266570376988968	0.00799711130966904	Persistent_Strategy
90	3	-5.00879288834536	0.00103870526206046	0.00623223157236277	Persistent_Strategy
135	3	-5.00879288834536	0.0039120068311368	0.0058680102467052	Persistent_Strategy
180	3	-5.00879288834536	0.00408163314359802	0.00408163314359802	Persistent_Strategy
225	3	-5.00879288834536	0	0.00343863614152436	Persistent_Strategy
270	3	-5.00879288834536	0	0	Persistent_Strategy
315	3	-5.00879288834536	0.00160225811700816	0	Persistent_Strategy
0	3	-3.68087976880318	0.00399502023869408	0.0049937752983676	Persistent_Strategy
45	3	-3.68087976880318	0.0173270745042829	0.0106628150795587	Persistent_Strategy
90	3	-3.68087976880318	0.0311611578618139	0.0166192841929674	Persistent_Strategy
135	3	-3.68087976880318	0.0117360204934104	0.00978001707784201	Persistent_Strategy
180	3	-3.68087976880318	0.0142857160025931	0.00204081657179901	Persistent_Strategy
225	3	-3.68087976880318	0	0	Persistent_Strategy
270	3	-3.68087976880318	0	0	Persistent_Strategy
315	3	-3.68087976880318	0	0.00320451623401632	Persistent_Strategy
0	3	-2.352966649261	0.0329589169692262	0.0489389979240025	Persistent_Strategy
45	3	-2.352966649261	0.0699747239596041	0.0606447607649902	Persistent_Strategy
90	3	-2.352966649261	0.124644631447255	0.104909231468107	Persistent_Strategy
135	3	-2.352966649261	0.0743281297915993	0.0841081468694413	Persistent_Strategy
180	3	-2.352966649261	0.0489795977231762	0.0408163314359802	Persistent_Strategy
225	3	-2.352966649261	0.0223511349199083	0.018912498778384	Persistent_Strategy
270	3	-2.352966649261	0.0323400564721279	0.0254100443709576	Persistent_Strategy
315	3	-2.352966649261	0.0144203230530734	0.0384541948081958	Persistent_Strategy
0	3	-1.02505352971882	0.203746032173398	0.227716153605563	Persistent_Strategy
45	3	-1.02505352971882	0.268569654816385	0.276566766126054	Persistent_Strategy
90	3	-1.02505352971882	0.279411715494264	0.286682652328687	Persistent_Strategy
135	3	-1.02505352971882	0.185820324478998	0.248412433777187	Persistent_Strategy
180	3	-1.02505352971882	0.120408177736142	0.126530627451539	Persistent_Strategy
225	3	-1.02505352971882	0.187405669713078	0.115194310741066	Persistent_Strategy
270	3	-1.02505352971882	0.18942033076532	0.138600242023405	Persistent_Strategy
315	3	-1.02505352971882	0.161828069817824	0.238736459434216	Persistent_Strategy
0	3	0.302859589823361	0.398503268809735	0.356555556303447	Persistent_Strategy
45	3	0.302859589823361	0.308555211364731	0.314553044846982	Persistent_Strategy
90	3	0.302859589823361	0.251366673418632	0.252405378680692	Persistent_Strategy
135	3	0.302859589823361	0.254280444023892	0.256236447439461	Persistent_Strategy
180	3	0.302859589823361	0.265306154333871	0.281632686908263	Persistent_Strategy
225	3	0.302859589823361	0.309477252737192	0.287126117817284	Persistent_Strategy
270	3	0.302859589823361	0.339570592957343	0.332640580856172	Persistent_Strategy
315	3	0.302859589823361	0.384541948081958	0.371723883145893	Persistent_Strategy
0	3	1.63077270936554	0.10786554644474	0.110861811623761	Persistent_Strategy
45	3	1.63077270936554	0.0826368168665801	0.079304687154218	Persistent_Strategy
90	3	1.63077270936554	0.0592061999374463	0.0727093683442323	Persistent_Strategy
135	3	1.63077270936554	0.189732331310135	0.111492194687399	Persistent_Strategy
180	3	1.63077270936554	0.228571456041489	0.187755124605509	Persistent_Strategy
225	3	1.63077270936554	0.185686351642315	0.233827257623656	Persistent_Strategy
270	3	1.63077270936554	0.173250302529256	0.191730334799044	Persistent_Strategy
315	3	1.63077270936554	0.181055167221922	0.0993400032545059	Persistent_Strategy
0	3	2.95868582890772	0.00299626517902056	0.00199751011934704	Persistent_Strategy
45	3	2.95868582890772	0.00066642594247242	0.00199927782741726	Persistent_Strategy
90	3	2.95868582890772	0.00415482104824185	0.0103870526206046	Persistent_Strategy
135	3	2.95868582890772	0.0273840478179576	0.029340051233526	Persistent_Strategy
180	3	2.95868582890772	0.0612244971539703	0.0877551125873574	Persistent_Strategy
225	3	2.95868582890772	0.0343863614152436	0.0739306770427737	Persistent_Strategy
270	3	2.95868582890772	0.0184800322697874	0.0623701089105323	Persistent_Strategy
315	3	2.95868582890772	0.00961354870204895	0.00160225811700816	Persistent_Strategy
0	3	4.2865989484499	0	0	Persistent_Strategy
45	3	4.2865989484499	0	0	Persistent_Strategy
90	3	4.2865989484499	0	0	Persistent_Strategy
135	3	4.2865989484499	0.0039120068311368	0.0058680102467052	Persistent_Strategy
180	3	4.2865989484499	0.0102040828589951	0.0224489822897891	Persistent_Strategy
225	3	4.2865989484499	0.0137545445660974	0.0206318168491462	Persistent_Strategy
270	3	4.2865989484499	0	0.00231000403372342	Persistent_Strategy
315	3	4.2865989484499	0	0	Persistent_Strategy
0	3	5.61451206799209	0	0	Persistent_Strategy
45	3	5.61451206799209	0	0	Persistent_Strategy
90	3	5.61451206799209	0	0	Persistent_Strategy
135	3	5.61451206799209	0	0	Persistent_Strategy
180	3	5.61451206799209	0	0	Persistent_Strategy
225	3	5.61451206799209	0	0	Persistent_Strategy
270	3	5.61451206799209	0	0	Persistent_Strategy
315	3	5.61451206799209	0	0	Persistent_Strategy
0	3	6.94242518753427	0	0	Persistent_Strategy
45	3	6.94242518753427	0	0	Persistent_Strategy
90	3	6.94242518753427	0	0	Persistent_Strategy
135	3	6.94242518753427	0	0	Persistent_Strategy
180	3	6.94242518753427	0	0	Persistent_Strategy
225	3	6.94242518753427	0	0	Persistent_Strategy
270	3	6.94242518753427	0	0	Persistent_Strategy
315	3	6.94242518753427	0	0	Persistent_Strategy
0	3	8.27033830707645	0	0	Persistent_Strategy
45	3	8.27033830707645	0	0	Persistent_Strategy
90	3	8.27033830707645	0	0	Persistent_Strategy
135	3	8.27033830707645	0	0	Persistent_Strategy
180	3	8.27033830707645	0	0	Persistent_Strategy
225	3	8.27033830707645	0	0	Persistent_Strategy
270	3	8.27033830707645	0	0	Persistent_Strategy
315	3	8.27033830707645	0	0	Persistent_Strategy
0	3	9.59825142661863	0	0	Persistent_Strategy
45	3	9.59825142661863	0	0	Persistent_Strategy
90	3	9.59825142661863	0	0	Persistent_Strategy
135	3	9.59825142661863	0	0	Persistent_Strategy
180	3	9.59825142661863	0	0	Persistent_Strategy
225	3	9.59825142661863	0	0	Persistent_Strategy
270	3	9.59825142661863	0	0	Persistent_Strategy
315	3	9.59825142661863	0	0	Persistent_Strategy
0	3	10.9261645461608	0	0	Persistent_Strategy
45	3	10.9261645461608	0	0	Persistent_Strategy
90	3	10.9261645461608	0	0	Persistent_Strategy
135	3	10.9261645461608	0	0	Persistent_Strategy
180	3	10.9261645461608	0	0	Persistent_Strategy
225	3	10.9261645461608	0	0	Persistent_Strategy
270	3	10.9261645461608	0	0	Persistent_Strategy
315	3	10.9261645461608	0	0	Persistent_Strategy
0	3	12.254077665703	0	0	Persistent_Strategy
45	3	12.254077665703	0	0	Persistent_Strategy
90	3	12.254077665703	0	0	Persistent_Strategy
135	3	12.254077665703	0	0	Persistent_Strategy
180	3	12.254077665703	0	0	Persistent_Strategy
225	3	12.254077665703	0	0	Persistent_Strategy
270	3	12.254077665703	0	0	Persistent_Strategy
315	3	12.254077665703	0	0	Persistent_Strategy
0	3	13.5819907852452	0	0	Persistent_Strategy
45	3	13.5819907852452	0	0	Persistent_Strategy
90	3	13.5819907852452	0	0	Persistent_Strategy
135	3	13.5819907852452	0	0	Persistent_Strategy
180	3	13.5819907852452	0	0	Persistent_Strategy
225	3	13.5819907852452	0	0	Persistent_Strategy
270	3	13.5819907852452	0	0	Persistent_Strategy
315	3	13.5819907852452	0	0	Persistent_Strategy
0	3	14.9099039047874	0	0	Persistent_Strategy
45	3	14.9099039047874	0	0	Persistent_Strategy
90	3	14.9099039047874	0	0	Persistent_Strategy
135	3	14.9099039047874	0	0	Persistent_Strategy
180	3	14.9099039047874	0	0	Persistent_Strategy
225	3	14.9099039047874	0	0	Persistent_Strategy
270	3	14.9099039047874	0	0	Persistent_Strategy
315	3	14.9099039047874	0	0	Persistent_Strategy
0	3	16.2378170243295	0	0	Persistent_Strategy
45	3	16.2378170243295	0	0	Persistent_Strategy
90	3	16.2378170243295	0	0	Persistent_Strategy
135	3	16.2378170243295	0	0	Persistent_Strategy
180	3	16.2378170243295	0	0	Persistent_Strategy
225	3	16.2378170243295	0	0	Persistent_Strategy
270	3	16.2378170243295	0	0	Persistent_Strategy
315	3	16.2378170243295	0	0	Persistent_Strategy
0	1	-11.6483584860563	0	0	Fixed_Distribution
45	1	-11.6483584860563	0	0	Fixed_Distribution
90	1	-11.6483584860563	0	0	Fixed_Distribution
135	1	-11.6483584860563	0	0	Fixed_Distribution
180	1	-11.6483584860563	0	0	Fixed_Distribution
225	1	-11.6483584860563	0	0	Fixed_Distribution
270	1	-11.6483584860563	0	0	Fixed_Distribution
315	1	-11.6483584860563	0	0	Fixed_Distribution
0	1	-10.3204453665141	0	0	Fixed_Distribution
45	1	-10.3204453665141	0	0	Fixed_Distribution
90	1	-10.3204453665141	0	0	Fixed_Distribution
135	1	-10.3204453665141	0	0	Fixed_Distribution
180	1	-10.3204453665141	0	0	Fixed_Distribution
225	1	-10.3204453665141	0	0	Fixed_Distribution
270	1	-10.3204453665141	0	0	Fixed_Distribution
315	1	-10.3204453665141	0	0	Fixed_Distribution
0	1	-8.9925322469719	0	0	Fixed_Distribution
45	1	-8.9925322469719	0	0	Fixed_Distribution
90	1	-8.9925322469719	0	0	Fixed_Distribution
135	1	-8.9925322469719	0	0	Fixed_Distribution
180	1	-8.9925322469719	0	0	Fixed_Distribution
225	1	-8.9925322469719	0	0	Fixed_Distribution
270	1	-8.9925322469719	0	0	Fixed_Distribution
315	1	-8.9925322469719	0	0	Fixed_Distribution
0	1	-7.66461912742972	0	0	Fixed_Distribution
45	1	-7.66461912742972	0	0	Fixed_Distribution
90	1	-7.66461912742972	0	0	Fixed_Distribution
135	1	-7.66461912742972	0	0	Fixed_Distribution
180	1	-7.66461912742972	0	0	Fixed_Distribution
225	1	-7.66461912742972	0	0	Fixed_Distribution
270	1	-7.66461912742972	0	0	Fixed_Distribution
315	1	-7.66461912742972	0	0	Fixed_Distribution
0	1	-6.33670600788754	0	0.000998755059673521	Fixed_Distribution
45	1	-6.33670600788754	0	0	Fixed_Distribution
90	1	-6.33670600788754	0	0	Fixed_Distribution
135	1	-6.33670600788754	0	0	Fixed_Distribution
180	1	-6.33670600788754	0	0	Fixed_Distribution
225	1	-6.33670600788754	0	0	Fixed_Distribution
270	1	-6.33670600788754	0	0	Fixed_Distribution
315	1	-6.33670600788754	0.00160225811700816	0	Fixed_Distribution
0	1	-5.00879288834536	0.0129838157757558	0.0149813258951028	Fixed_Distribution
45	1	-5.00879288834536	0.00066642594247242	0.00066642594247242	Fixed_Distribution
90	1	-5.00879288834536	0	0	Fixed_Distribution
135	1	-5.00879288834536	0	0	Fixed_Distribution
180	1	-5.00879288834536	0	0	Fixed_Distribution
225	1	-5.00879288834536	0	0	Fixed_Distribution
270	1	-5.00879288834536	0.00462000806744684	0.0115500201686171	Fixed_Distribution
315	1	-5.00879288834536	0.0769083896163916	0.0528745178612693	Fixed_Distribution
0	1	-3.68087976880318	0.179775910741234	0.157803299428416	Fixed_Distribution
45	1	-3.68087976880318	0.0273234636413692	0.0613111867074626	Fixed_Distribution
90	1	-3.68087976880318	0.00207741052412092	0.00207741052412092	Fixed_Distribution
135	1	-3.68087976880318	0.0019560034155684	0	Fixed_Distribution
180	1	-3.68087976880318	0	0.00204081657179901	Fixed_Distribution
225	1	-3.68087976880318	0.00515795421228654	0.0137545445660974	Fixed_Distribution
270	1	-3.68087976880318	0.0508200887419152	0.0947101653826602	Fixed_Distribution
315	1	-3.68087976880318	0.33967872080573	0.267577105540363	Fixed_Distribution
0	1	-2.352966649261	0.302622783081077	0.269663866111851	Fixed_Distribution
45	1	-2.352966649261	0.16527363373316	0.176602874755191	Fixed_Distribution
90	1	-2.352966649261	0.0332385683859348	0.0415482104824185	Fixed_Distribution
135	1	-2.352966649261	0.0019560034155684	0.0117360204934104	Fixed_Distribution
180	1	-2.352966649261	0.00408163314359802	0.0183673491461911	Fixed_Distribution
225	1	-2.352966649261	0.0343863614152436	0.0773693131842981	Fixed_Distribution
270	1	-2.352966649261	0.17556030656298	0.18249031866415	Fixed_Distribution
315	1	-2.352966649261	0.227520652615159	0.290008719178477	Fixed_Distribution
0	1	-1.02505352971882	0.166792094965478	0.209738562531439	Fixed_Distribution
45	1	-1.02505352971882	0.249243302484685	0.204592764339033	Fixed_Distribution
90	1	-1.02505352971882	0.131915568281679	0.122567220923134	Fixed_Distribution
135	1	-1.02505352971882	0.00782401366227361	0.0273840478179576	Fixed_Distribution
180	1	-1.02505352971882	0.0265306154333871	0.0326530651487842	Fixed_Distribution
225	1	-1.02505352971882	0.115194310741066	0.115194310741066	Fixed_Distribution
270	1	-1.02505352971882	0.272580475979363	0.210210367068831	Fixed_Distribution
315	1	-1.02505352971882	0.0817151639674161	0.112158068190571	Fixed_Distribution
0	1	0.302859589823361	0.0699128541771465	0.0669165889981259	Fixed_Distribution
45	1	0.302859589823361	0.193929949259474	0.173937170985302	Fixed_Distribution
90	1	0.302859589823361	0.194237884005306	0.173463778764097	Fixed_Distribution
135	1	0.302859589823361	0.0606361058826205	0.0743281297915993	Fixed_Distribution
180	1	0.302859589823361	0.0448979645795782	0.0897959291591564	Fixed_Distribution
225	1	0.302859589823361	0.168493170934694	0.154738626368596	Fixed_Distribution
270	1	0.302859589823361	0.147840258158299	0.140910246057129	Fixed_Distribution
315	1	0.302859589823361	0.0224316136381142	0.0256361298721305	Fixed_Distribution
0	1	1.63077270936554	0.0199751011934704	0.0259676315515115	Fixed_Distribution
45	1	1.63077270936554	0.0833032428090525	0.087301798463887	Fixed_Distribution
90	1	1.63077270936554	0.165154136667613	0.163076726143492	Fixed_Distribution
135	1	1.63077270936554	0.133008232258651	0.0997561741939885	Fixed_Distribution
180	1	1.63077270936554	0.10408164516175	0.138775526882333	Fixed_Distribution
225	1	1.63077270936554	0.190844305854602	0.154738626368596	Fixed_Distribution
270	1	1.63077270936554	0.071610125045426	0.0669901169779792	Fixed_Distribution
315	1	1.63077270936554	0.00320451623401632	0.00480677435102448	Fixed_Distribution
0	1	2.95868582890772	0.000998755059673521	0.0049937752983676	Fixed_Distribution
45	1	2.95868582890772	0.0279898895838416	0.0299891674112589	Fixed_Distribution
90	1	2.95868582890772	0.126722041971376	0.109064052516348	Fixed_Distribution
135	1	2.95868582890772	0.144744252752062	0.136920239089788	Fixed_Distribution
180	1	2.95868582890772	0.167346958887519	0.132653077166936	Fixed_Distribution
225	1	2.95868582890772	0.106597720387255	0.130668173377926	Fixed_Distribution
270	1	2.95868582890772	0.0207900363035108	0.0300300524384044	Fixed_Distribution
315	1	2.95868582890772	0	0	Fixed_Distribution
0	1	4.2865989484499	0	0.00199751011934704	Fixed_Distribution
45	1	4.2865989484499	0.00399855565483452	0.0133285188494484	Fixed_Distribution
90	1	4.2865989484499	0.0592061999374463	0.081019010440716	Fixed_Distribution
135	1	4.2865989484499	0.150612262998767	0.168216293738883	Fixed_Distribution
180	1	4.2865989484499	0.138775526882333	0.140816343454132	Fixed_Distribution
225	1	4.2865989484499	0.0756499951135359	0.0584568144059141	Fixed_Distribution
270	1	4.2865989484499	0.00231000403372342	0.0138600242023405	Fixed_Distribution
315	1	4.2865989484499	0	0	Fixed_Distribution
0	1	5.61451206799209	0	0	Fixed_Distribution
45	1	5.61451206799209	0.00133285188494484	0.00466498159730694	Fixed_Distribution
90	1	5.61451206799209	0.0321998631238743	0.040509505220358	Fixed_Distribution
135	1	5.61451206799209	0.117360204934104	0.107580187856262	Fixed_Distribution
180	1	5.61451206799209	0.132653077166936	0.100000012018151	Fixed_Distribution
225	1	5.61451206799209	0.037824997556768	0.0292284072029571	Fixed_Distribution
270	1	5.61451206799209	0.00693001210117026	0.00231000403372342	Fixed_Distribution
315	1	5.61451206799209	0	0	Fixed_Distribution
0	1	6.94242518753427	0	0	Fixed_Distribution
45	1	6.94242518753427	0	0.00066642594247242	Fixed_Distribution
90	1	6.94242518753427	0.00727093683442323	0.00934834735854415	Fixed_Distribution
135	1	6.94242518753427	0.0821521434538729	0.0625921092981889	Fixed_Distribution
180	1	6.94242518753427	0.0816326628719604	0.0510204142949752	Fixed_Distribution
225	1	6.94242518753427	0.00687727228304872	0.0154738626368596	Fixed_Distribution
270	1	6.94242518753427	0	0	Fixed_Distribution
315	1	6.94242518753427	0	0	Fixed_Distribution
0	1	8.27033830707645	0	0	Fixed_Distribution
45	1	8.27033830707645	0	0	Fixed_Distribution
90	1	8.27033830707645	0.00103870526206046	0.00830964209648369	Fixed_Distribution
135	1	8.27033830707645	0.0449880785580732	0.0528120922203468	Fixed_Distribution
180	1	8.27033830707645	0.0306122485769851	0.0285714320051861	Fixed_Distribution
225	1	8.27033830707645	0.0103159084245731	0.00343863614152436	Fixed_Distribution
270	1	8.27033830707645	0	0	Fixed_Distribution
315	1	8.27033830707645	0	0	Fixed_Distribution
0	1	9.59825142661863	0	0	Fixed_Distribution
45	1	9.59825142661863	0	0	Fixed_Distribution
90	1	9.59825142661863	0	0.00103870526206046	Fixed_Distribution
135	1	9.59825142661863	0.00586801024670521	0.00586801024670521	Fixed_Distribution
180	1	9.59825142661863	0.0163265325743921	0.0122448994307941	Fixed_Distribution
225	1	9.59825142661863	0.00171931807076218	0	Fixed_Distribution
270	1	9.59825142661863	0	0	Fixed_Distribution
315	1	9.59825142661863	0	0	Fixed_Distribution
0	1	10.9261645461608	0	0	Fixed_Distribution
45	1	10.9261645461608	0	0	Fixed_Distribution
90	1	10.9261645461608	0	0.00103870526206046	Fixed_Distribution
135	1	10.9261645461608	0.0019560034155684	0.00586801024670521	Fixed_Distribution
180	1	10.9261645461608	0.00204081657179901	0.00612244971539703	Fixed_Distribution
225	1	10.9261645461608	0	0	Fixed_Distribution
270	1	10.9261645461608	0	0	Fixed_Distribution
315	1	10.9261645461608	0	0	Fixed_Distribution
0	1	12.254077665703	0	0	Fixed_Distribution
45	1	12.254077665703	0	0	Fixed_Distribution
90	1	12.254077665703	0	0	Fixed_Distribution
135	1	12.254077665703	0	0	Fixed_Distribution
180	1	12.254077665703	0.00204081657179901	0	Fixed_Distribution
225	1	12.254077665703	0	0	Fixed_Distribution
270	1	12.254077665703	0	0	Fixed_Distribution
315	1	12.254077665703	0	0	Fixed_Distribution
0	1	13.5819907852452	0	0	Fixed_Distribution
45	1	13.5819907852452	0	0	Fixed_Distribution
90	1	13.5819907852452	0	0	Fixed_Distribution
135	1	13.5819907852452	0	0	Fixed_Distribution
180	1	13.5819907852452	0.00204081657179901	0	Fixed_Distribution
225	1	13.5819907852452	0	0	Fixed_Distribution
270	1	13.5819907852452	0	0	Fixed_Distribution
315	1	13.5819907852452	0	0	Fixed_Distribution
0	1	14.9099039047874	0	0	Fixed_Distribution
45	1	14.9099039047874	0	0	Fixed_Distribution
90	1	14.9099039047874	0	0	Fixed_Distribution
135	1	14.9099039047874	0	0	Fixed_Distribution
180	1	14.9099039047874	0	0	Fixed_Distribution
225	1	14.9099039047874	0	0	Fixed_Distribution
270	1	14.9099039047874	0	0	Fixed_Distribution
315	1	14.9099039047874	0	0	Fixed_Distribution
0	1	16.2378170243295	0	0	Fixed_Distribution
45	1	16.2378170243295	0	0	Fixed_Distribution
90	1	16.2378170243295	0	0	Fixed_Distribution
135	1	16.2378170243295	0	0	Fixed_Distribution
180	1	16.2378170243295	0	0	Fixed_Distribution
225	1	16.2378170243295	0	0	Fixed_Distribution
270	1	16.2378170243295	0	0	Fixed_Distribution
315	1	16.2378170243295	0	0	Fixed_Distribution
0	2	-11.6483584860563	0	0	Fixed_Distribution
45	2	-11.6483584860563	0	0	Fixed_Distribution
90	2	-11.6483584860563	0	0	Fixed_Distribution
135	2	-11.6483584860563	0	0	Fixed_Distribution
180	2	-11.6483584860563	0	0	Fixed_Distribution
225	2	-11.6483584860563	0	0	Fixed_Distribution
270	2	-11.6483584860563	0	0	Fixed_Distribution
315	2	-11.6483584860563	0	0	Fixed_Distribution
0	2	-10.3204453665141	0	0	Fixed_Distribution
45	2	-10.3204453665141	0	0	Fixed_Distribution
90	2	-10.3204453665141	0	0	Fixed_Distribution
135	2	-10.3204453665141	0	0	Fixed_Distribution
180	2	-10.3204453665141	0	0	Fixed_Distribution
225	2	-10.3204453665141	0	0	Fixed_Distribution
270	2	-10.3204453665141	0	0	Fixed_Distribution
315	2	-10.3204453665141	0	0	Fixed_Distribution
0	2	-8.9925322469719	0	0	Fixed_Distribution
45	2	-8.9925322469719	0	0	Fixed_Distribution
90	2	-8.9925322469719	0	0	Fixed_Distribution
135	2	-8.9925322469719	0	0	Fixed_Distribution
180	2	-8.9925322469719	0	0	Fixed_Distribution
225	2	-8.9925322469719	0	0	Fixed_Distribution
270	2	-8.9925322469719	0	0	Fixed_Distribution
315	2	-8.9925322469719	0	0	Fixed_Distribution
0	2	-7.66461912742972	0	0	Fixed_Distribution
45	2	-7.66461912742972	0	0	Fixed_Distribution
90	2	-7.66461912742972	0	0	Fixed_Distribution
135	2	-7.66461912742972	0	0	Fixed_Distribution
180	2	-7.66461912742972	0	0	Fixed_Distribution
225	2	-7.66461912742972	0	0	Fixed_Distribution
270	2	-7.66461912742972	0	0	Fixed_Distribution
315	2	-7.66461912742972	0	0	Fixed_Distribution
0	2	-6.33670600788754	0	0	Fixed_Distribution
45	2	-6.33670600788754	0	0	Fixed_Distribution
90	2	-6.33670600788754	0	0	Fixed_Distribution
135	2	-6.33670600788754	0	0	Fixed_Distribution
180	2	-6.33670600788754	0	0	Fixed_Distribution
225	2	-6.33670600788754	0	0	Fixed_Distribution
270	2	-6.33670600788754	0	0	Fixed_Distribution
315	2	-6.33670600788754	0	0	Fixed_Distribution
0	2	-5.00879288834536	0	0	Fixed_Distribution
45	2	-5.00879288834536	0.00466498159730694	0	Fixed_Distribution
90	2	-5.00879288834536	0.00934834735854415	0	Fixed_Distribution
135	2	-5.00879288834536	0.0019560034155684	0	Fixed_Distribution
180	2	-5.00879288834536	0	0	Fixed_Distribution
225	2	-5.00879288834536	0	0	Fixed_Distribution
270	2	-5.00879288834536	0	0	Fixed_Distribution
315	2	-5.00879288834536	0	0	Fixed_Distribution
0	2	-3.68087976880318	0.00599253035804113	0.00199751011934704	Fixed_Distribution
45	2	-3.68087976880318	0.0499819456854315	0.0199927782741726	Fixed_Distribution
90	2	-3.68087976880318	0.0716706630821718	0.0332385683859348	Fixed_Distribution
135	2	-3.68087976880318	0.0567240990514837	0.0117360204934104	Fixed_Distribution
180	2	-3.68087976880318	0.0122448994307941	0.00408163314359802	Fixed_Distribution
225	2	-3.68087976880318	0	0	Fixed_Distribution
270	2	-3.68087976880318	0	0	Fixed_Distribution
315	2	-3.68087976880318	0	0	Fixed_Distribution
0	2	-2.352966649261	0.0759053845351876	0.0948817306689845	Fixed_Distribution
45	2	-2.352966649261	0.20659204216645	0.146613707343932	Fixed_Distribution
90	2	-2.352966649261	0.184889536646762	0.148534852474646	Fixed_Distribution
135	2	-2.352966649261	0.174084303985588	0.0938881639472833	Fixed_Distribution
180	2	-2.352966649261	0.0632653137257693	0.0204081657179901	Fixed_Distribution
225	2	-2.352966649261	0.00515795421228654	0	Fixed_Distribution
270	2	-2.352966649261	0.00231000403372342	0.00231000403372342	Fixed_Distribution
315	2	-2.352966649261	0.00320451623401632	0.0128180649360653	Fixed_Distribution
0	2	-1.02505352971882	0.31760410897618	0.290637722364995	Fixed_Distribution
45	2	-1.02505352971882	0.279232469895944	0.337211526891045	Fixed_Distribution
90	2	-1.02505352971882	0.198392705053548	0.267985957611599	Fixed_Distribution
135	2	-1.02505352971882	0.211248368881387	0.224940392790366	Fixed_Distribution
180	2	-1.02505352971882	0.18571430803371	0.161224509172122	Fixed_Distribution
225	2	-1.02505352971882	0.085965903538109	0.0704920409012494	Fixed_Distribution
270	2	-1.02505352971882	0.0231000403372342	0.0369600645395747	Fixed_Distribution
315	2	-1.02505352971882	0.161828069817824	0.16503258605184	Fixed_Distribution
0	2	0.302859589823361	0.297629007782709	0.301624028021403	Fixed_Distribution
45	2	0.302859589823361	0.179268578525081	0.202593486511616	Fixed_Distribution
90	2	0.302859589823361	0.162038020881432	0.22436033660506	Fixed_Distribution
135	2	0.302859589823361	0.18386432106343	0.267972467932871	Fixed_Distribution
180	2	0.302859589823361	0.293877586339057	0.304081669198052	Fixed_Distribution
225	2	0.302859589823361	0.331828387657101	0.261336346755851	Fixed_Distribution
270	2	0.302859589823361	0.258720451777023	0.203280354967661	Fixed_Distribution
315	2	0.302859589823361	0.414984852305113	0.424598401007162	Fixed_Distribution
0	2	1.63077270936554	0.0519352631030231	0.0609240586400848	Fixed_Distribution
45	2	1.63077270936554	0.0279898895838416	0.0413184084332901	Fixed_Distribution
90	2	1.63077270936554	0.0862125367510183	0.0727093683442323	Fixed_Distribution
135	2	1.63077270936554	0.109536191271831	0.144744252752062	Fixed_Distribution
180	2	1.63077270936554	0.177551041746514	0.218367373182494	Fixed_Distribution
225	2	1.63077270936554	0.287126117817284	0.350740886435485	Fixed_Distribution
270	2	1.63077270936554	0.318780556653832	0.422730738171386	Fixed_Distribution
315	2	1.63077270936554	0.153816779232783	0.140998714296718	Fixed_Distribution
0	2	2.95868582890772	0.00399502023869408	0.00299626517902056	Fixed_Distribution
45	2	2.95868582890772	0.00533140753977936	0.00533140753977936	Fixed_Distribution
90	2	2.95868582890772	0.0311611578618138	0.00623223157236277	Fixed_Distribution
135	2	2.95868582890772	0.0156480273245472	0.00978001707784201	Fixed_Distribution
180	2	2.95868582890772	0.0183673491461911	0.0408163314359802	Fixed_Distribution
225	2	2.95868582890772	0.0429829517690545	0.0704920409012494	Fixed_Distribution
270	2	2.95868582890772	0.143220250090852	0.0808501411803197	Fixed_Distribution
315	2	2.95868582890772	0.0192270974040979	0.00961354870204895	Fixed_Distribution
0	2	4.2865989484499	0	0	Fixed_Distribution
45	2	4.2865989484499	0	0	Fixed_Distribution
90	2	4.2865989484499	0.00830964209648369	0	Fixed_Distribution
135	2	4.2865989484499	0	0	Fixed_Distribution
180	2	4.2865989484499	0.00204081657179901	0.00408163314359802	Fixed_Distribution
225	2	4.2865989484499	0	0	Fixed_Distribution
270	2	4.2865989484499	0.00693001210117026	0.00693001210117026	Fixed_Distribution
315	2	4.2865989484499	0	0	Fixed_Distribution
0	2	5.61451206799209	0	0	Fixed_Distribution
45	2	5.61451206799209	0	0	Fixed_Distribution
90	2	5.61451206799209	0.00103870526206046	0	Fixed_Distribution
135	2	5.61451206799209	0	0	Fixed_Distribution
180	2	5.61451206799209	0	0	Fixed_Distribution
225	2	5.61451206799209	0	0	Fixed_Distribution
270	2	5.61451206799209	0	0	Fixed_Distribution
315	2	5.61451206799209	0	0	Fixed_Distribution
0	2	6.94242518753427	0	0	Fixed_Distribution
45	2	6.94242518753427	0	0	Fixed_Distribution
90	2	6.94242518753427	0	0	Fixed_Distribution
135	2	6.94242518753427	0	0	Fixed_Distribution
180	2	6.94242518753427	0	0	Fixed_Distribution
225	2	6.94242518753427	0	0	Fixed_Distribution
270	2	6.94242518753427	0	0	Fixed_Distribution
315	2	6.94242518753427	0	0	Fixed_Distribution
0	2	8.27033830707645	0	0	Fixed_Distribution
45	2	8.27033830707645	0	0	Fixed_Distribution
90	2	8.27033830707645	0	0	Fixed_Distribution
135	2	8.27033830707645	0	0	Fixed_Distribution
180	2	8.27033830707645	0	0	Fixed_Distribution
225	2	8.27033830707645	0	0	Fixed_Distribution
270	2	8.27033830707645	0	0	Fixed_Distribution
315	2	8.27033830707645	0	0	Fixed_Distribution
0	2	9.59825142661863	0	0	Fixed_Distribution
45	2	9.59825142661863	0	0	Fixed_Distribution
90	2	9.59825142661863	0	0	Fixed_Distribution
135	2	9.59825142661863	0	0	Fixed_Distribution
180	2	9.59825142661863	0	0	Fixed_Distribution
225	2	9.59825142661863	0	0	Fixed_Distribution
270	2	9.59825142661863	0	0	Fixed_Distribution
315	2	9.59825142661863	0	0	Fixed_Distribution
0	2	10.9261645461608	0	0	Fixed_Distribution
45	2	10.9261645461608	0	0	Fixed_Distribution
90	2	10.9261645461608	0	0	Fixed_Distribution
135	2	10.9261645461608	0	0	Fixed_Distribution
180	2	10.9261645461608	0	0	Fixed_Distribution
225	2	10.9261645461608	0	0	Fixed_Distribution
270	2	10.9261645461608	0	0	Fixed_Distribution
315	2	10.9261645461608	0	0	Fixed_Distribution
0	2	12.254077665703	0	0	Fixed_Distribution
45	2	12.254077665703	0	0	Fixed_Distribution
90	2	12.254077665703	0	0	Fixed_Distribution
135	2	12.254077665703	0	0	Fixed_Distribution
180	2	12.254077665703	0	0	Fixed_Distribution
225	2	12.254077665703	0	0	Fixed_Distribution
270	2	12.254077665703	0	0	Fixed_Distribution
315	2	12.254077665703	0	0	Fixed_Distribution
0	2	13.5819907852452	0	0	Fixed_Distribution
45	2	13.5819907852452	0	0	Fixed_Distribution
90	2	13.5819907852452	0	0	Fixed_Distribution
135	2	13.5819907852452	0	0	Fixed_Distribution
180	2	13.5819907852452	0	0	Fixed_Distribution
225	2	13.5819907852452	0	0	Fixed_Distribution
270	2	13.5819907852452	0	0	Fixed_Distribution
315	2	13.5819907852452	0	0	Fixed_Distribution
0	2	14.9099039047874	0	0	Fixed_Distribution
45	2	14.9099039047874	0	0	Fixed_Distribution
90	2	14.9099039047874	0	0	Fixed_Distribution
135	2	14.9099039047874	0	0	Fixed_Distribution
180	2	14.9099039047874	0	0	Fixed_Distribution
225	2	14.9099039047874	0	0	Fixed_Distribution
270	2	14.9099039047874	0	0	Fixed_Distribution
315	2	14.9099039047874	0	0	Fixed_Distribution
0	2	16.2378170243295	0	0	Fixed_Distribution
45	2	16.2378170243295	0	0	Fixed_Distribution
90	2	16.2378170243295	0	0	Fixed_Distribution
135	2	16.2378170243295	0	0	Fixed_Distribution
180	2	16.2378170243295	0	0	Fixed_Distribution
225	2	16.2378170243295	0	0	Fixed_Distribution
270	2	16.2378170243295	0	0	Fixed_Distribution
315	2	16.2378170243295	0	0	Fixed_Distribution
0	3	-11.6483584860563	0	0	Fixed_Distribution
45	3	-11.6483584860563	0	0	Fixed_Distribution
90	3	-11.6483584860563	0	0	Fixed_Distribution
135	3	-11.6483584860563	0	0	Fixed_Distribution
180	3	-11.6483584860563	0	0	Fixed_Distribution
225	3	-11.6483584860563	0	0	Fixed_Distribution
270	3	-11.6483584860563	0	0	Fixed_Distribution
315	3	-11.6483584860563	0	0	Fixed_Distribution
0	3	-10.3204453665141	0	0	Fixed_Distribution
45	3	-10.3204453665141	0	0	Fixed_Distribution
90	3	-10.3204453665141	0	0	Fixed_Distribution
135	3	-10.3204453665141	0	0	Fixed_Distribution
180	3	-10.3204453665141	0	0	Fixed_Distribution
225	3	-10.3204453665141	0	0	Fixed_Distribution
270	3	-10.3204453665141	0	0	Fixed_Distribution
315	3	-10.3204453665141	0	0	Fixed_Distribution
0	3	-8.9925322469719	0	0	Fixed_Distribution
45	3	-8.9925322469719	0	0	Fixed_Distribution
90	3	-8.9925322469719	0	0	Fixed_Distribution
135	3	-8.9925322469719	0	0	Fixed_Distribution
180	3	-8.9925322469719	0	0	Fixed_Distribution
225	3	-8.9925322469719	0	0	Fixed_Distribution
270	3	-8.9925322469719	0	0	Fixed_Distribution
315	3	-8.9925322469719	0	0	Fixed_Distribution
0	3	-7.66461912742972	0	0	Fixed_Distribution
45	3	-7.66461912742972	0.00066642594247242	0	Fixed_Distribution
90	3	-7.66461912742972	0	0	Fixed_Distribution
135	3	-7.66461912742972	0	0	Fixed_Distribution
180	3	-7.66461912742972	0	0	Fixed_Distribution
225	3	-7.66461912742972	0	0	Fixed_Distribution
270	3	-7.66461912742972	0	0	Fixed_Distribution
315	3	-7.66461912742972	0	0	Fixed_Distribution
0	3	-6.33670600788754	0.000998755059673521	0	Fixed_Distribution
45	3	-6.33670600788754	0.00199927782741726	0.00199927782741726	Fixed_Distribution
90	3	-6.33670600788754	0.00207741052412092	0.00519352631030231	Fixed_Distribution
135	3	-6.33670600788754	0.0019560034155684	0.00586801024670521	Fixed_Distribution
180	3	-6.33670600788754	0	0	Fixed_Distribution
225	3	-6.33670600788754	0	0	Fixed_Distribution
270	3	-6.33670600788754	0	0	Fixed_Distribution
315	3	-6.33670600788754	0	0	Fixed_Distribution
0	3	-5.00879288834536	0.00199751011934704	0.00299626517902056	Fixed_Distribution
45	3	-5.00879288834536	0.00266570376988968	0.0113292410220311	Fixed_Distribution
90	3	-5.00879288834536	0.00103870526206046	0.0166192841929674	Fixed_Distribution
135	3	-5.00879288834536	0.0039120068311368	0.0156480273245472	Fixed_Distribution
180	3	-5.00879288834536	0.00408163314359802	0.00204081657179901	Fixed_Distribution
225	3	-5.00879288834536	0	0	Fixed_Distribution
270	3	-5.00879288834536	0	0	Fixed_Distribution
315	3	-5.00879288834536	0.00160225811700816	0	Fixed_Distribution
0	3	-3.68087976880318	0.00399502023869408	0.00799004047738817	Fixed_Distribution
45	3	-3.68087976880318	0.0173270745042829	0.0159942226193381	Fixed_Distribution
90	3	-3.68087976880318	0.0311611578618139	0.0342772736479952	Fixed_Distribution
135	3	-3.68087976880318	0.0117360204934104	0.0332520580646628	Fixed_Distribution
180	3	-3.68087976880318	0.0142857160025931	0.0204081657179901	Fixed_Distribution
225	3	-3.68087976880318	0	0.0085965903538109	Fixed_Distribution
270	3	-3.68087976880318	0	0.00231000403372342	Fixed_Distribution
315	3	-3.68087976880318	0	0.00160225811700816	Fixed_Distribution
0	3	-2.352966649261	0.0329589169692262	0.0419477125062879	Fixed_Distribution
45	3	-2.352966649261	0.0699747239596041	0.0899675022337767	Fixed_Distribution
90	3	-2.352966649261	0.124644631447255	0.125683336709316	Fixed_Distribution
135	3	-2.352966649261	0.0743281297915993	0.105624184440694	Fixed_Distribution
180	3	-2.352966649261	0.0489795977231762	0.0571428640103723	Fixed_Distribution
225	3	-2.352966649261	0.0223511349199083	0.0240704529906705	Fixed_Distribution
270	3	-2.352966649261	0.0323400564721279	0.0485100847081918	Fixed_Distribution
315	3	-2.352966649261	0.0144203230530734	0.030442904223155	Fixed_Distribution
0	3	-1.02505352971882	0.203746032173398	0.245693744679686	Fixed_Distribution
45	3	-1.02505352971882	0.268569654816385	0.29456026657281	Fixed_Distribution
90	3	-1.02505352971882	0.279411715494264	0.254482789204813	Fixed_Distribution
135	3	-1.02505352971882	0.185820324478998	0.199512348387977	Fixed_Distribution
180	3	-1.02505352971882	0.120408177736142	0.202040840608102	Fixed_Distribution
225	3	-1.02505352971882	0.187405669713078	0.216634076916035	Fixed_Distribution
270	3	-1.02505352971882	0.18942033076532	0.200970350933937	Fixed_Distribution
315	3	-1.02505352971882	0.161828069817824	0.173043876636881	Fixed_Distribution
0	3	0.302859589823361	0.398503268809735	0.35755431136312	Fixed_Distribution
45	3	0.302859589823361	0.308555211364731	0.273901062356165	Fixed_Distribution
90	3	0.302859589823361	0.251366673418632	0.232669978701543	Fixed_Distribution
135	3	0.302859589823361	0.254280444023892	0.236676413283777	Fixed_Distribution
180	3	0.302859589823361	0.265306154333871	0.277551053764665	Fixed_Distribution
225	3	0.302859589823361	0.309477252737192	0.318073843091003	Fixed_Distribution
270	3	0.302859589823361	0.339570592957343	0.332640580856172	Fixed_Distribution
315	3	0.302859589823361	0.384541948081958	0.347690011390771	Fixed_Distribution
0	3	1.63077270936554	0.10786554644474	0.0928842205496374	Fixed_Distribution
45	3	1.63077270936554	0.0826368168665801	0.0599783348225178	Fixed_Distribution
90	3	1.63077270936554	0.0592061999374463	0.0779028946545346	Fixed_Distribution
135	3	1.63077270936554	0.189732331310135	0.127140222011946	Fixed_Distribution
180	3	1.63077270936554	0.228571456041489	0.136734710310534	Fixed_Distribution
225	3	1.63077270936554	0.185686351642315	0.144422717944023	Fixed_Distribution
270	3	1.63077270936554	0.173250302529256	0.143220250090852	Fixed_Distribution
315	3	1.63077270936554	0.181055167221922	0.18265742533893	Fixed_Distribution
0	3	2.95868582890772	0.00299626517902056	0.00399502023869408	Fixed_Distribution
45	3	2.95868582890772	0.00066642594247242	0.00533140753977936	Fixed_Distribution
90	3	2.95868582890772	0.00415482104824185	0.00623223157236277	Fixed_Distribution
135	3	2.95868582890772	0.0273840478179576	0.0254280444023892	Fixed_Distribution
180	3	2.95868582890772	0.0612244971539703	0.0510204142949753	Fixed_Distribution
225	3	2.95868582890772	0.0343863614152436	0.0412636336982923	Fixed_Distribution
270	3	2.95868582890772	0.0184800322697874	0.0231000403372342	Fixed_Distribution
315	3	2.95868582890772	0.00961354870204895	0.0176248392870898	Fixed_Distribution
0	3	4.2865989484499	0	0	Fixed_Distribution
45	3	4.2865989484499	0	0	Fixed_Distribution
90	3	4.2865989484499	0	0	Fixed_Distribution
135	3	4.2865989484499	0.0039120068311368	0.0039120068311368	Fixed_Distribution
180	3	4.2865989484499	0.0102040828589951	0.00612244971539703	Fixed_Distribution
225	3	4.2865989484499	0.0137545445660974	0	Fixed_Distribution
270	3	4.2865989484499	0	0.00231000403372342	Fixed_Distribution
315	3	4.2865989484499	0	0	Fixed_Distribution
0	3	5.61451206799209	0	0	Fixed_Distribution
45	3	5.61451206799209	0	0	Fixed_Distribution
90	3	5.61451206799209	0	0	Fixed_Distribution
135	3	5.61451206799209	0	0	Fixed_Distribution
180	3	5.61451206799209	0	0	Fixed_Distribution
225	3	5.61451206799209	0	0	Fixed_Distribution
270	3	5.61451206799209	0	0	Fixed_Distribution
315	3	5.61451206799209	0	0	Fixed_Distribution
0	3	6.94242518753427	0	0	Fixed_Distribution
45	3	6.94242518753427	0	0	Fixed_Distribution
90	3	6.94242518753427	0	0	Fixed_Distribution
135	3	6.94242518753427	0	0	Fixed_Distribution
180	3	6.94242518753427	0	0	Fixed_Distribution
225	3	6.94242518753427	0	0	Fixed_Distribution
270	3	6.94242518753427	0	0	Fixed_Distribution
315	3	6.94242518753427	0	0	Fixed_Distribution
0	3	8.27033830707645	0	0	Fixed_Distribution
45	3	8.27033830707645	0	0	Fixed_Distribution
90	3	8.27033830707645	0	0	Fixed_Distribution
135	3	8.27033830707645	0	0	Fixed_Distribution
180	3	8.27033830707645	0	0	Fixed_Distribution
225	3	8.27033830707645	0	0	Fixed_Distribution
270	3	8.27033830707645	0	0	Fixed_Distribution
315	3	8.27033830707645	0	0	Fixed_Distribution
0	3	9.59825142661863	0	0	Fixed_Distribution
45	3	9.59825142661863	0	0	Fixed_Distribution
90	3	9.59825142661863	0	0	Fixed_Distribution
135	3	9.59825142661863	0	0	Fixed_Distribution
180	3	9.59825142661863	0	0	Fixed_Distribution
225	3	9.59825142661863	0	0	Fixed_Distribution
270	3	9.59825142661863	0	0	Fixed_Distribution
315	3	9.59825142661863	0	0	Fixed_Distribution
0	3	10.9261645461608	0	0	Fixed_Distribution
45	3	10.9261645461608	0	0	Fixed_Distribution
90	3	10.9261645461608	0	0	Fixed_Distribution
135	3	10.9261645461608	0	0	Fixed_Distribution
180	3	10.9261645461608	0	0	Fixed_Distribution
225	3	10.9261645461608	0	0	Fixed_Distribution
270	3	10.9261645461608	0	0	Fixed_Distribution
315	3	10.9261645461608	0	0	Fixed_Distribution
0	3	12.254077665703	0	0	Fixed_Distribution
45	3	12.254077665703	0	0	Fixed_Distribution
90	3	12.254077665703	0	0	Fixed_Distribution
135	3	12.254077665703	0	0	Fixed_Distribution
180	3	12.254077665703	0	0	Fixed_Distribution
225	3	12.254077665703	0	0	Fixed_Distribution
270	3	12.254077665703	0	0	Fixed_Distribution
315	3	12.254077665703	0	0	Fixed_Distribution
0	3	13.5819907852452	0	0	Fixed_Distribution
45	3	13.5819907852452	0	0	Fixed_Distribution
90	3	13.5819907852452	0	0	Fixed_Distribution
135	3	13.5819907852452	0	0	Fixed_Distribution
180	3	13.5819907852452	0	0	Fixed_Distribution
225	3	13.5819907852452	0	0	Fixed_Distribution
270	3	13.5819907852452	0	0	Fixed_Distribution
315	3	13.5819907852452	0	0	Fixed_Distribution
0	3	14.9099039047874	0	0	Fixed_Distribution
45	3	14.9099039047874	0	0	Fixed_Distribution
90	3	14.9099039047874	0	0	Fixed_Distribution
135	3	14.9099039047874	0	0	Fixed_Distribution
180	3	14.9099039047874	0	0	Fixed_Distribution
225	3	14.9099039047874	0	0	Fixed_Distribution
270	3	14.9099039047874	0	0	Fixed_Distribution
315	3	14.9099039047874	0	0	Fixed_Distribution
0	3	16.2378170243295	0	0	Fixed_Distribution
45	3	16.2378170243295	0	0	Fixed_Distribution
90	3	16.2378170243295	0	0	Fixed_Distribution
135	3	16.2378170243295	0	0	Fixed_Distribution
180	3	16.2378170243295	0	0	Fixed_Distribution
225	3	16.2378170243295	0	0	Fixed_Distribution
270	3	16.2378170243295	0	0	Fixed_Distribution
315	3	16.2378170243295	0	0	Fixed_Distribution
