# Supplementary material for: Constraints on neural redundancy
Source: eLife journal article supplement (doi:10.7554/elife.36774), 2018-08-15
Supplement: supp [file elife-36774-supp-v1.zip › elife_poa_e36774_Figure_5_source_data_1.csv]

Minimal_Firing	Minimal_Deviation	Uncontrolled_uniform	Uncontrolled_empirical	Persistent_Strategy	Fixed_Distribution	datestr	errorMetric	monkeyName
73.4406087033975	18.0682861738414	55.06111301345	15.7918367453762	15.5454245362921	12.8443225522026	20120302	histError	Jeffy
66.5663592823547	15.1574490664673	47.2631224082006	16.688937419643	16.9380414317482	14.4519089527441	20120303	histError	Jeffy
78.443574428429	23.5639952596398	61.4531951073194	20.2422449459861	21.221081877054	14.5774223020453	20120305	histError	Jeffy
82.7061056785763	23.2430992982581	57.6473373479778	17.4208693919835	15.5004810811168	15.0509352002009	20120306	histError	Jeffy
67.2024024070597	23.5762309522204	60.4948810277468	24.2746598168744	22.1486921255995	17.0397961319009	20120308	histError	Jeffy
76.6443378295742	21.8635352011923	55.2063623111305	19.2694173161641	14.5809308395196	11.5494892836791	20120309	histError	Jeffy
85.4881528656722	36.0518066002085	64.5147756028119	26.9079586671469	22.0077448012892	19.1486012500283	20120319	histError	Jeffy
66.5719519461266	27.749502874234	63.1923990059548	23.2069415373368	16.3837961498953	12.4771151327599	20120321	histError	Jeffy
64.3298822871181	29.4485148472945	58.7653542772369	22.8193660289748	13.6264056928082	14.9332805960149	20120323	histError	Jeffy
63.2330288749187	32.9812455833369	66.3913008899693	31.1782442346057	26.3976171806517	12.0058921140053	20120329	histError	Jeffy
81.9510862736412	25.0402013139789	57.775290800798	23.3287086209062	18.130381929343	16.6549366497951	20120331	histError	Jeffy
82.0778419940945	27.7075474499275	59.4459597109502	18.8821094137623	13.979502082432	13.8459639499152	20120403	histError	Jeffy
77.647467501056	32.0695356072684	67.1566644823883	21.6067285788471	17.2138198812222	10.2478024798736	20120514	histError	Jeffy
83.4381828391573	31.8087979952201	64.6592060613369	22.8421982319384	16.0420927228142	16.0269442529916	20120516	histError	Jeffy
85.371398010019	32.2093954051532	61.5067217362694	20.1022331810223	13.6733410331625	11.230101968008	20120518	histError	Jeffy
82.7301401972138	27.81151214104	61.2722353744598	21.5697227342163	17.8221192867072	12.9675250114002	20120521	histError	Jeffy
79.6125739453534	28.7776875018301	62.230865952854	20.3422144093275	14.8430453155566	12.7140977332482	20120523	histError	Jeffy
89.8644063440328	38.8972869928001	60.2872614244793	32.7384346913044	23.9328801545598	19.4023734980815	20120525	histError	Jeffy
81.6177881633855	22.9372591717112	55.8725463978504	21.7547622495277	13.7542214291696	10.7172486368154	20120528	histError	Jeffy
64.415232636553	25.1193727800694	56.1298317652943	18.5754765237622	10.356653846138	7.02087585644679	20120530	histError	Jeffy
70.1067277504303	29.0716755517925	63.5331807704795	22.3617760507396	14.7352268335398	9.73778112307366	20120601	histError	Jeffy
69.7831106799233	33.6118511496607	64.4406581229559	27.6965176700619	16.4681012826734	12.9922318723181	20120628	histError	Jeffy
78.9611471198275	32.9107327729502	64.1222534821345	33.5210446794462	21.6725502804848	17.1158440570451	20120630	histError	Jeffy
85.0456191555942	30.755262484109	62.0063169999748	26.6450868009833	10.4071682940525	8.83560392823022	20120703	histError	Jeffy
79.9660504926938	28.0974321781844	58.1873797469284	23.3933163062593	9.86795242279904	8.75803362054804	20120709	histError	Jeffy
63.8243840171464	21.6387572583708	44.0718998647948	17.6571425000028	8.6124337465632	5.72897876639936	20131204	histError	Lincoln
71.8734137189025	27.666447428076	46.9545714672446	23.79382943026	12.6625822192194	9.46517944717226	20131205	histError	Lincoln
64.0005764416669	24.6400798454862	51.7491909174307	24.016212815689	17.448493741875	10.845933701615	20131208	histError	Lincoln
59.8741701632471	27.2920312996636	46.9931947002624	24.4275449297798	13.6789031856024	10.1976105034449	20131211	histError	Lincoln
63.4556860399076	33.3725921741887	54.6322386698571	29.420568605594	15.2036599764374	12.6943766831705	20131212	histError	Lincoln
66.2254266102037	23.6101138498374	48.7432048583922	20.7384216149611	12.2003987184927	8.83559021796159	20131218	histError	Lincoln
66.6604759117178	30.6515145204521	55.461008760445	19.9636877174596	19.4965025998258	14.2790307024156	20160329	histError	Nelson
75.4223376979352	36.3355961887561	57.722711620223	24.2135989527743	20.7396046405345	15.1628387497141	20160402	histError	Nelson
77.1187212046877	36.772707222944	61.3966540525546	26.8918247969887	19.357367106651	15.4665260766633	20160404	histError	Nelson
76.429151140514	33.8291867526424	60.9520409940273	24.7821248722442	20.0909141758134	15.4670357304014	20160405	histError	Nelson
69.3739443487091	47.1773901711509	45.6213650813614	24.2966095750734	22.4546205760905	12.8683438757158	20160714	histError	Nelson
71.5794060707063	45.5607363800382	47.0301168127934	29.0405999620306	21.3684223732739	18.8957453511542	20160722	histError	Nelson
63.627919661639	51.3833390593494	56.7853268864564	37.1815346863368	25.8376121877926	14.8542873320438	20160726	histError	Nelson
75.6622907358087	37.5527375412263	45.4954967714841	22.3911436287211	20.4650845374473	15.2195926572686	20160727	histError	Nelson
66.9915135822176	42.7643978862003	49.5855878126794	29.7508919580371	21.6289445720099	21.3270219449855	20160728	histError	Nelson
62.4164443473825	37.2591182521566	41.2147938881587	18.2954848234152	18.9403151375461	15.0893785508935	20160810	histError	Nelson
61.8971361912288	42.8928464663309	55.4918978625046	30.4040466968503	24.1144948212099	14.0424543202671	20160814	histError	Nelson
185.692559620728	16.4081674196052	135.016613806	24.4343083480263	24.6709190267472	19.2128195036417	20120302	meanError	Jeffy
236.597646184764	42.1985082938979	109.599325656235	41.9136315628544	38.1788140882283	37.3695445026073	20120303	meanError	Jeffy
175.22983262244	26.4524744368965	169.16766420591	38.2965977260782	37.3833621202786	28.2800681322646	20120305	meanError	Jeffy
201.172293520952	32.07758330141	174.799122700271	35.24207037364	29.7052584465374	30.2669486722299	20120306	meanError	Jeffy
188.869670622392	33.406130797832	181.408352049411	44.8625248258407	40.2344118442291	32.104370465981	20120308	meanError	Jeffy
173.544310884081	25.5929016605627	121.263636676141	32.6010026787566	24.9147937641387	20.8969941900007	20120309	meanError	Jeffy
172.810795687892	41.7352158072332	223.174382523026	60.0794139539528	43.8200183531953	40.8556168563712	20120319	meanError	Jeffy
168.164170915206	38.9892579917494	237.056290621077	53.4920974922797	32.9909009124667	22.7266635299431	20120321	meanError	Jeffy
192.659089162334	53.7871656231456	200.630145101431	51.9445325479388	26.4872531081363	32.8097799377147	20120323	meanError	Jeffy
173.583920853633	48.2237912992501	233.577653519882	67.6584156126238	49.0962728165125	14.7937405916669	20120329	meanError	Jeffy
236.594000098933	37.1965572133001	200.653148060614	37.5931098351958	30.3426266978895	28.0065731951222	20120331	meanError	Jeffy
202.18777440799	30.655566452594	183.630499999717	33.1647392214238	22.9440619353374	18.4762528439696	20120403	meanError	Jeffy
185.4824695083	35.3615423068269	231.314228212257	35.9972226140954	28.7088657825432	15.7931631405798	20120514	meanError	Jeffy
245.530451332166	42.1990332721647	242.431744742362	41.7711315178291	27.2681902162501	24.0267166562641	20120516	meanError	Jeffy
237.452181340919	28.2373384311768	213.521186922814	30.475219128226	19.5362473737255	13.3200140958826	20120518	meanError	Jeffy
237.171880160424	32.8411273833942	196.659023328191	36.3684134472795	33.4367375358151	15.8564024658284	20120521	meanError	Jeffy
222.314880509021	28.945278986011	209.547970742293	32.8059486985518	24.1064889297651	20.1850218683923	20120523	meanError	Jeffy
254.497337228332	55.0773747968498	176.598537605664	59.0685330441923	41.6983010836366	29.2868064157077	20120525	meanError	Jeffy
226.771384488273	44.0979577402467	201.10208581053	43.34486604023	23.9934488043323	19.5136296246429	20120528	meanError	Jeffy
215.874004996023	44.1967797709451	212.906796180095	42.7926709927447	21.8488163484566	10.817844831025	20120530	meanError	Jeffy
147.736920557236	38.7865693672735	269.352317338074	47.3132425702762	30.4540324353922	15.7015412068877	20120601	meanError	Jeffy
226.235428406275	43.373799548195	244.681162431628	52.3052207858998	30.4766727833295	20.9951272859744	20120628	meanError	Jeffy
234.781769494037	48.1829199456807	184.433337368368	54.9973280865182	37.1449109534645	24.8243254345895	20120630	meanError	Jeffy
199.4277306929	40.2468371503644	183.736460973271	46.1019821651591	15.9668576932009	10.7374711495469	20120703	meanError	Jeffy
224.819610136398	43.2324981566329	156.060038753957	44.9908899357695	13.1867122623256	12.8510619673531	20120709	meanError	Jeffy
180.322353624786	51.7791892313953	114.834348266402	55.8396027738355	23.0166626236377	14.1536848589988	20131204	meanError	Lincoln
191.072903290104	52.5773510208149	103.598868306532	57.1171726164859	28.4990371017974	18.5002335298387	20131205	meanError	Lincoln
154.736709679426	47.484024709795	141.257612710718	53.2294517309422	35.2763560409941	18.1985610789925	20131208	meanError	Lincoln
169.151112393107	54.965695340995	123.480946710175	52.5059733447459	31.039104483811	18.4311611687006	20131211	meanError	Lincoln
185.047392770907	60.2031501156174	153.646595656932	63.0170478038115	27.6793948045377	22.5824981113428	20131212	meanError	Lincoln
186.704220752231	49.8356266941913	131.587768331604	50.5855751250396	25.1942390512572	16.8131457252307	20131218	meanError	Lincoln
180.977300771502	53.3225991687297	237.381889991623	52.549932277177	46.3792509630336	31.3274049456384	20160329	meanError	Nelson
179.709824035478	49.490843719948	218.322037296301	49.0391500845948	38.416724504818	23.8021016349463	20160402	meanError	Nelson
169.749305587367	52.1153272321258	260.395794039404	45.9574389232274	25.134892388642	21.4858326100247	20160404	meanError	Nelson
173.509063264326	67.0143385592557	224.375479486612	53.7918519107314	42.0677459206529	27.3361674223099	20160405	meanError	Nelson
161.501025331945	80.6676810172609	109.779300393245	50.6256592208519	41.4932497573754	22.9813000775919	20160714	meanError	Nelson
215.654445894287	70.2888553372899	122.914416864347	68.9007658295206	43.1568554861918	36.9470570454625	20160722	meanError	Nelson
161.965940556402	92.5957794901612	188.659526329232	102.327548960849	50.7215805703768	21.9715520071521	20160726	meanError	Nelson
204.732046448349	55.2021376111332	136.64226024894	51.0428877465962	42.8612974713449	27.9513442328689	20160727	meanError	Nelson
201.550355471121	93.1154764598394	171.427912084695	93.1893730834195	52.7566276502112	55.3976718003536	20160728	meanError	Nelson
160.370043786084	58.6641281221781	98.3325624583438	39.4887823353544	43.7188026009986	27.2002537597091	20160810	meanError	Nelson
157.486594123707	72.5144494830516	168.074508902905	71.2258670179102	51.1621921609346	23.5226114026677	20160814	meanError	Nelson
6.12431880872687	2.26450681463578	7.06294583331351	1.4659594158649	1.68893020201471	1.53095576075997	20120302	covError	Jeffy
6.03747633409317	2.18644211445247	6.75773098031107	1.51931565024729	1.53221894292221	1.36578217017609	20120303	covError	Jeffy
6.35789133972908	1.96354112268287	7.62751855147377	1.63533356669802	1.61429465574193	1.57612246766042	20120305	covError	Jeffy
6.25775297010929	2.33427601100211	7.38802289001503	1.62679255984332	1.30303526848715	1.59088143659175	20120306	covError	Jeffy
5.40041218476162	1.8863459018312	7.42471879940774	1.96628632374191	1.74828854925222	1.70630256532431	20120308	covError	Jeffy
5.78132265873738	2.07872428769817	6.71946487778857	1.59446598740605	1.49626247106584	1.35991514511602	20120309	covError	Jeffy
6.247881772175	2.28135705041146	7.78812325305642	2.21921117636193	1.66478799585653	1.70739522347453	20120319	covError	Jeffy
6.83306472411604	2.86573573381752	7.94865785770246	2.22085100396324	1.92090196645398	1.70688332042361	20120321	covError	Jeffy
5.88980424082302	2.50697107622002	7.68678940956163	2.13556930263436	1.51574787228883	1.654894006708	20120323	covError	Jeffy
7.26993300344526	2.73520711891726	7.70078684585957	2.48710578174663	2.06695815850611	1.19694929921108	20120329	covError	Jeffy
6.37030636896827	2.80638495816356	7.61828749961353	2.13829736791497	1.43405761543343	1.28611555800521	20120331	covError	Jeffy
6.92058223234311	2.79563038880852	7.16853794604506	1.39896681967141	0.977206796735896	0.898590061485791	20120403	covError	Jeffy
6.17513302820504	2.80503319137577	7.70546580337097	1.98284363358034	1.33176149005425	0.862049789022851	20120514	covError	Jeffy
6.90932907835876	2.84039180882688	8.27060991281897	2.16596726343213	1.05783402951919	1.05875931647171	20120516	covError	Jeffy
7.29865469201786	2.90295779859738	7.63225468639673	1.55968912616964	1.1888685303572	0.963268342351613	20120518	covError	Jeffy
6.47570056225311	2.66697979952048	7.40722546219447	1.69500333797095	1.31485146849922	1.22595709356509	20120521	covError	Jeffy
6.52579523883161	2.77697272656637	7.73952776823521	1.86194527682147	1.20649746768664	0.867324033545745	20120523	covError	Jeffy
6.12198549334241	2.65193658480791	7.74902821252493	2.14222198615839	1.17337313146643	1.29758916170183	20120525	covError	Jeffy
6.37616873524562	2.88753132162493	7.54073151680505	2.0042053598206	1.03328792734408	0.876657209597423	20120528	covError	Jeffy
7.07035367501844	2.9171914315714	7.55073472053867	1.98284904610134	1.37589776013196	1.26943477337879	20120530	covError	Jeffy
5.43662200653007	2.47932038316388	7.79913957517329	2.06854318048231	1.34107097990494	0.976004089575668	20120601	covError	Jeffy
6.50715821295976	2.74564737087179	8.00199160202337	2.25900028053964	1.31170114325533	1.14335896137613	20120628	covError	Jeffy
5.68707030987962	1.99127394249243	8.0271721977017	2.5697643084539	1.37874940362147	1.10960239107528	20120630	covError	Jeffy
6.47616159325656	2.42693858495144	7.44595343835326	1.98627326225458	0.901845441090371	0.829742331786813	20120703	covError	Jeffy
6.21642996000744	2.28541754072985	7.33220890270404	1.62701072616213	0.809469859250192	0.696967708183048	20120709	covError	Jeffy
4.67270317384214	2.14655408604112	5.79477297812276	1.77463934972056	1.12723149158596	1.05992969998022	20131204	covError	Lincoln
4.76598275236143	2.0472795765692	5.7762991669061	1.51026204531258	0.969815257454658	0.836053983235661	20131205	covError	Lincoln
5.23419330753154	2.36271439989775	6.22024063917676	1.72220903793752	1.31680834271514	1.16977205544302	20131208	covError	Lincoln
4.95841898426087	2.24995359047076	5.97973954093186	2.01083479294594	1.40966546060995	1.12212062836413	20131211	covError	Lincoln
4.3300227532945	2.18687843720275	6.70688276561661	2.15428546515752	1.41196581304138	1.35586571076373	20131212	covError	Lincoln
5.7449812010782	2.13099303507074	5.7019629022484	1.73199622922496	0.936695318238643	0.961486555165969	20131218	covError	Lincoln
6.62773035046018	3.17245191286284	6.33125383809455	2.0565910063333	1.88455688865012	1.57022231544541	20160329	covError	Nelson
5.87437184024396	2.94475734091567	6.40792581624502	1.86854444932282	1.69028276071486	1.50625354786331	20160402	covError	Nelson
5.04999615971785	2.74596609264017	7.11739724784104	2.53652138075736	1.7000855059592	1.57999530973872	20160404	covError	Nelson
5.9349032128016	2.78143496193067	6.75973290499749	2.84634036437658	2.2998750551506	1.99730649922035	20160405	covError	Nelson
4.29975165357516	3.04216282382542	6.13084623601843	2.4517837929945	1.90843439625283	1.60314818715923	20160714	covError	Nelson
5.87327900528188	3.41779005428887	6.08154315794411	2.87347630694281	1.92349968380238	1.88183638078285	20160722	covError	Nelson
5.10592385629857	3.24261117530028	7.18440413863846	3.70583786656867	2.42490950497361	2.11264865088841	20160726	covError	Nelson
6.44035523325669	3.55650773414836	6.02446415072046	2.32060348087092	2.01262420103777	1.69574295474348	20160727	covError	Nelson
6.11949831107822	3.55616931247409	6.59909647848881	2.79803201904176	2.067272326455	2.1546233447593	20160728	covError	Nelson
4.62851018334295	3.30679241971231	5.63182427623592	2.2207160889535	1.82235290489618	1.54326342129137	20160810	covError	Nelson
4.92079605334881	3.25620523397634	6.79809889457041	3.28025154135366	2.34194212902157	1.98146968548622	20160814	covError	Nelson
