# Supplementary material for: Constraints on neural redundancy
Source: eLife journal article supplement (doi:10.7554/elife.36774), 2018-08-15
Supplement: supp [file elife-36774-supp-v1.zip › elife_poa_e36774_Figure_6_source_data_1.csv]

Minimal_Firing	Minimal_Deviation	Uncontrolled_uniform	Uncontrolled_empirical	Persistent_Strategy	Fixed_Distribution	Data	datestr	monkeyName
-2.08411594126869	-0.630564404367743	1.96272557007106	0.0527512037753044	0.0994159405879674	-0.040797882281482	-0.269806647239007	20120302	Jeffy
-1.69977484923011	-0.270390328866617	2.33147672991272	0.456476448872313	0.445746746219791	0.00605099506971038	-0.002080931886868	20120303	Jeffy
-1.79944015957141	-0.36577994226561	2.50127077509988	0.0245039995067408	0.0550593889319242	0.0254902558533864	-0.323693145813112	20120305	Jeffy
-1.62513388286688	-0.323718063646287	2.4197919488917	0.165654885511497	0.181888863048989	0.032794017173166	-0.0378716797824174	20120306	Jeffy
-2.01840344761543	-0.630195278467079	2.06690407338394	0.125263653435809	0.100045716585083	-0.0394346458711534	-0.270432497495426	20120308	Jeffy
-2.18524636284138	-0.636375393663291	1.94660665492495	0.10681565764371	0.0538622407019681	0.0176157806416315	-0.350619751642959	20120309	Jeffy
-2.34581484545123	-0.992259737456302	1.90778589551005	0.26698954096995	0.0590814251299808	-0.00516799036315514	-0.494309349291894	20120319	Jeffy
-1.64315343353325	-0.426898691875674	2.77142864532908	0.598101992404031	0.484853129016723	-0.00512099283121076	-0.176996677054562	20120321	Jeffy
-1.27076852469666	-0.335713501565302	2.36788402227969	0.518620965359989	0.330078790689407	0.0189703564938796	-0.139595535045727	20120323	Jeffy
-2.35058998847604	-0.749689490931817	2.5635568138815	0.286149335832791	0.11967614263803	-0.0205306986525402	-0.155075395535706	20120329	Jeffy
-1.50908157172593	-0.268797961424874	2.93250367401905	0.651185799147381	0.398428964831137	-0.00542215093671099	-0.099151407836605	20120331	Jeffy
-1.70728374090056	-0.467582611671847	2.40163261710425	0.460162210140956	0.325750464918319	0.00479893224422698	-0.0267616353178678	20120403	Jeffy
-1.77363518000456	-0.412297288654929	2.67939762536017	0.188142784764606	0.0209013314726726	-0.0216095557957051	-0.0554847430896113	20120514	Jeffy
-2.29378231641277	-0.76813980834934	2.4204453439131	0.461971080841071	0.266973808295779	-0.0622061548925565	-0.078804150970871	20120516	Jeffy
-1.86641626253393	-0.790146421452518	1.96498166706043	0.289886649025273	0.255230528320098	-0.0337466460997291	-0.203025614412258	20120518	Jeffy
-1.71686762549057	-0.460928299933347	2.5754247811746	0.689841336607104	0.364818065564932	-0.0604925548704448	-0.0734346691288538	20120521	Jeffy
-2.05025352357935	-0.865639115322007	2.31032840153128	0.524030806824968	0.299608518846331	-0.0688386735821889	-0.103760461883329	20120523	Jeffy
-1.69154366054279	-0.475929559049717	2.91738743231465	0.345312236798322	0.163533715195838	0.0310885856634895	-0.23763186301438	20120525	Jeffy
-1.4209159861812	-0.346715120668446	2.8343130596884	0.489059407853812	0.277576315093523	-0.0129209608057016	0.00199120730139364	20120528	Jeffy
-1.3680654044336	-0.331427933692098	2.81295745195365	0.2464406338758	0.134879508040198	-0.0127736470503287	0.016801586385052	20120530	Jeffy
-1.80400861342803	-0.613701934806242	2.334449334456	0.552677825499042	0.290808818449225	-0.0609992392063458	-0.12581963989301	20120601	Jeffy
-1.38401312198452	-0.316324510846756	2.49294155465354	0.568730653272328	0.351223727367736	-0.024701758853135	-0.165619570975458	20120628	Jeffy
-1.19182009282968	-0.469437801030288	2.19248606090547	0.678500319596562	0.521768421685198	0.0580145242730462	-0.0745661916248407	20120630	Jeffy
-1.30955816178804	-0.324004459155389	2.44789774602421	0.619332385946117	0.354225663233254	-0.0107657399841824	-0.0812882131757934	20120703	Jeffy
-1.85290056319494	-0.742176050067317	2.11234364158749	0.293760300865886	0.170533256728194	-0.010919397676674	-0.107145035336217	20120709	Jeffy
-1.31099029522685	-0.459876338133596	1.85493189222355	0.159848644247433	0.110644664567437	0.0168354804955418	-0.0432377934481165	20131204	Lincoln
-0.774886743776455	-0.122572790546084	2.21405220487441	0.104522578165555	0.114562877077959	-0.00590497870754747	0.0475732671259769	20131205	Lincoln
-1.05823430354003	0.0335023110981156	2.18580531619638	0.284869618577261	0.145246062645538	-0.0303418700437373	-0.026622900778327	20131208	Lincoln
-1.66701188166865	-0.633372118630968	1.25232819165588	0.568467378472354	0.402676715397933	-0.055267527444787	-0.0986737343213876	20131211	Lincoln
-0.913511603719466	-0.351091690581554	2.37358768277715	0.475719192144991	0.234508609277332	-0.0471321062920878	-0.144137189531016	20131212	Lincoln
-0.445775071832361	0.00119435554776137	1.83980217182191	0.218569118999007	0.125647604523172	-0.0254795858415951	0.0268242664529084	20131218	Lincoln
-3.2132470175432	-1.50617155362469	1.23156061662497	0.229928012420817	-0.0553400984042166	-0.0365158017452007	-0.201840442508072	20160329	Nelson
-1.97593390614533	-0.743320036578539	1.91458243410919	0.454345129667946	0.182334958196606	-0.050688411513163	-0.145180080610932	20160402	Nelson
-1.77681764102247	-0.631249651835898	2.08376009104298	0.440755601460406	0.294416007046154	-0.0117907746563376	-0.189269792731295	20160404	Nelson
-1.77924874065207	-0.690621784000439	2.09715599477635	0.613289442882898	0.311936520969497	-0.0619324407157578	-0.0514510151824067	20160405	Nelson
-1.68810832812587	-1.28931743247987	1.24942212179759	0.746938605435431	0.510530411000424	-0.0836563798125908	-0.135789754821157	20160714	Nelson
-2.4265565904897	-1.32402280561151	1.31429949517014	0.410198854631471	0.130080378500375	-0.0654813224026101	-0.24950725817773	20160722	Nelson
-2.12132539973896	-1.23387197998074	1.59290112232752	0.962998654358844	0.587628734629697	-0.144164103706486	-0.409420462247669	20160726	Nelson
-2.00748315976573	-1.2312961821475	1.53757139261464	0.741954615535102	0.482734745618895	-0.0134624998146302	-0.21288962887827	20160727	Nelson
-3.08118611222384	-2.23166408629251	0.482814037408834	0.323770790626079	-0.00678154657555651	-0.0217200615235895	-0.294668132363574	20160728	Nelson
-1.51629225655787	-0.859285501120384	1.8289005115919	-0.0175005314712083	-0.118766672859911	-0.153894694200384	-0.235949411151753	20160810	Nelson
-1.53321880204072	-0.741241357477014	2.00731728193522	0.751936513856451	0.363972312955594	-0.0359219900667007	-0.303602654404032	20160814	Nelson
