# Supplementary material for: Constraints on neural redundancy
Source: eLife journal article supplement (doi:10.7554/elife.36774), 2018-08-15
Supplement: supp [file elife-36774-supp-v1.zip › elife_poa_e36774_Supplementary_File_1.xlsx]

## Sheet: Sheet1
Location	Test name	p-value	N	Description
Results: "Minimal firing hypotheses..." last para	paired t-test	p = 2.653e-25	42	Histogram error (all monkeys, 42 sessions) lower for Minimal Firing than for Minimal Deviation
Figure 5A	1-sided Wilcoxon signed rank test	p ≤ 1.317e-08 for all hypotheses	42	Histogram error (all monkeys, 42 sessions) lower for Fixed Distribution than the five other hypotheses
Figure 5B	1-sided Wilcoxon signed rank test	p ≤ 5.005e-08 for all hypotheses	42	Mean error (all monkeys, 42 sessions) lower for Fixed Distribution than the five other hypotheses
Figure 5C	1-sided Wilcoxon signed rank test	p ≤ 2.665e-06 for all hypotheses	42	Covariance error (all monkeys, 42 sessions) lower for Fixed Distribution than the five other hypotheses
Figure 5 - Figure supplement 1A (left)	1-sided Wilcoxon signed rank test	p ≤ 1.198e-05 for all hypotheses	25	Histogram error (Monkey J, 25 sessions) lower for Fixed Distribution than the five other hypotheses
Figure 5 - Figure supplement 1B (left)	1-sided Wilcoxon signed rank test	p ≤ 0.016 for all hypotheses	6	Histogram error (Monkey L, 6 sessions) lower for Fixed Distribution than the five other hypotheses
Figure 5 - Figure supplement 1C (left)	1-sided Wilcoxon signed rank test	p ≤ 0.0004 for all hypotheses	11	Histogram error (Monkey N, 11 sessions) lower for Fixed Distribution than the five other hypotheses
Figure 5 - Figure supplement 1A (middle)	1-sided Wilcoxon signed rank test	p ≤ 4.276e-05 for all hypotheses	25	Mean error, Monkey J (Monkey J, 25 sessions) lower for Fixed Distribution than the five other hypotheses
Figure 5 - Figure supplement 1B (middle)	1-sided Wilcoxon signed rank test	p ≤ 0.016 for all hypotheses	6	Mean error, Monkey L (Monkey L, 6 sessions) lower for Fixed Distribution than the five other hypotheses
Figure 5 - Figure supplement 1C (middle)	1-sided Wilcoxon signed rank test	p ≤ 0.001 for all hypotheses	11	Mean error, Monkey N (Monkey N, 11 sessions) lower for Fixed Distribution than the five other hypotheses
Figure 5 - Figure supplement 1A (right)	1-sided Wilcoxon signed rank test	p ≤ 9.421e-06 for all hyps but PS (p = 0.001)	25	Covariance error, Monkey J (Monkey J, 25 sessions) lower for Fixed Distribution than the five other hypotheses
Figure 5 - Figure supplement 1B (right)	1-sided Wilcoxon signed rank test	p ≤ 0.031 for all hypotheses	6	Covariance error, Monkey L (Monkey L, 6 sessions) lower for Fixed Distribution than the five other hypotheses
Figure 5 - Figure supplement 1C (right)	1-sided Wilcoxon signed rank test	p ≤ 4.883e-04 for all hyps but PS (p = 0.002)	11	Covariance error, Monkey N (Monkey N, 11 sessions) lower for Fixed Distribution than the five other hypotheses
Figure 5 - Figure supplement 2A	1-sided Wilcoxon signed rank test	p ≤ 3.927e-07 for all hypotheses	42	Histogram error (all monkeys, 42 sessions; hypotheses use 2nd mapping to predict 1st mapping) lower for Fixed Distribution than the five other hypotheses
Figure 5 - Figure supplement 2B	1-sided Wilcoxon signed rank test	p ≤ 9.495e-07 for all hypotheses	42	Mean error (all monkeys, 42 sessions; hypotheses use 2nd mapping to predict 1st mapping) lower for Fixed Distribution than the five other hypotheses
Figure 5 - Figure supplement 2C	1-sided Wilcoxon signed rank test	p ≤ 0.0001 for all hypotheses	39	Covariance error (all monkeys, 39 sessions; hypotheses use 2nd mapping to predict 1st mapping) lower for Fixed Distribution than the five other hypotheses
Figure 5 - Figure supplement 3A	1-sided Wilcoxon signed rank test	p ≤ 8.545e-09 for all hyps but PS (p = 0.011)	42	Histogram error (all monkeys, 42 sessions; without applying IME) lower for Fixed Distribution than the five other hypotheses
Figure 5 - Figure supplement 3B	1-sided Wilcoxon signed rank test	p ≤ 8.545e-09 for all hyps but PS (p = 0.001)	42	Mean error (all monkeys, 42 sessions; without applying IME) lower for Fixed Distribution than the five other hypotheses
Figure 5 - Figure supplement 3C	1-sided Wilcoxon signed rank test	p ≤ 8.545e-09 for all hyps but PS (p = 0.258)	42	Covariance error (all monkeys, 42 sessions; without applying IME) lower for Fixed Distribution than the five other hypotheses
Results: "Predicting changes in..." para 4	t-test	p = 7.905e-10	42	Variance of observed activity showed a small but significant decrease when it became output-null (all monkeys, 42 sessions)
Results: "Predicting changes in..." para 5	t-test	p = 1.575e-04	42	Variance of activity predicted by Fixed Distribution showed a small but significant decrease when it became output-null (all monkeys, 42 sessions)
Results: "Predicting changes in..." para 6	t-test	p = 0.611	42	Variance of observed activity did not significantly change when it began as output-null and became output-potent (all monkeys, 42 sessions)
Results: "Predicting changes in..." last para	1-sided Wilcoxon signed rank test	p = 0.999	42	We did not find evidence that the observed mean output-null activity was closer to the mean predicted by Minimal Deviation than was the mean predicted by Fixed Distribution (all monkeys, 42 sessions)
Results: "Predicting changes in..." last para	1-sided Wilcoxon signed rank test	p = 0.291	42	We did not find evidence that the observed mean output-null activity was closer to the mean predicted by Minimal Firing than was the mean predicted by Fixed Distribution (all monkeys, 42 sessions)
