# Supplementary figures and images for: Constraints on neural redundancy
Source: eLife journal article supplement (doi:10.7554/elife.36774), 2018-08-15

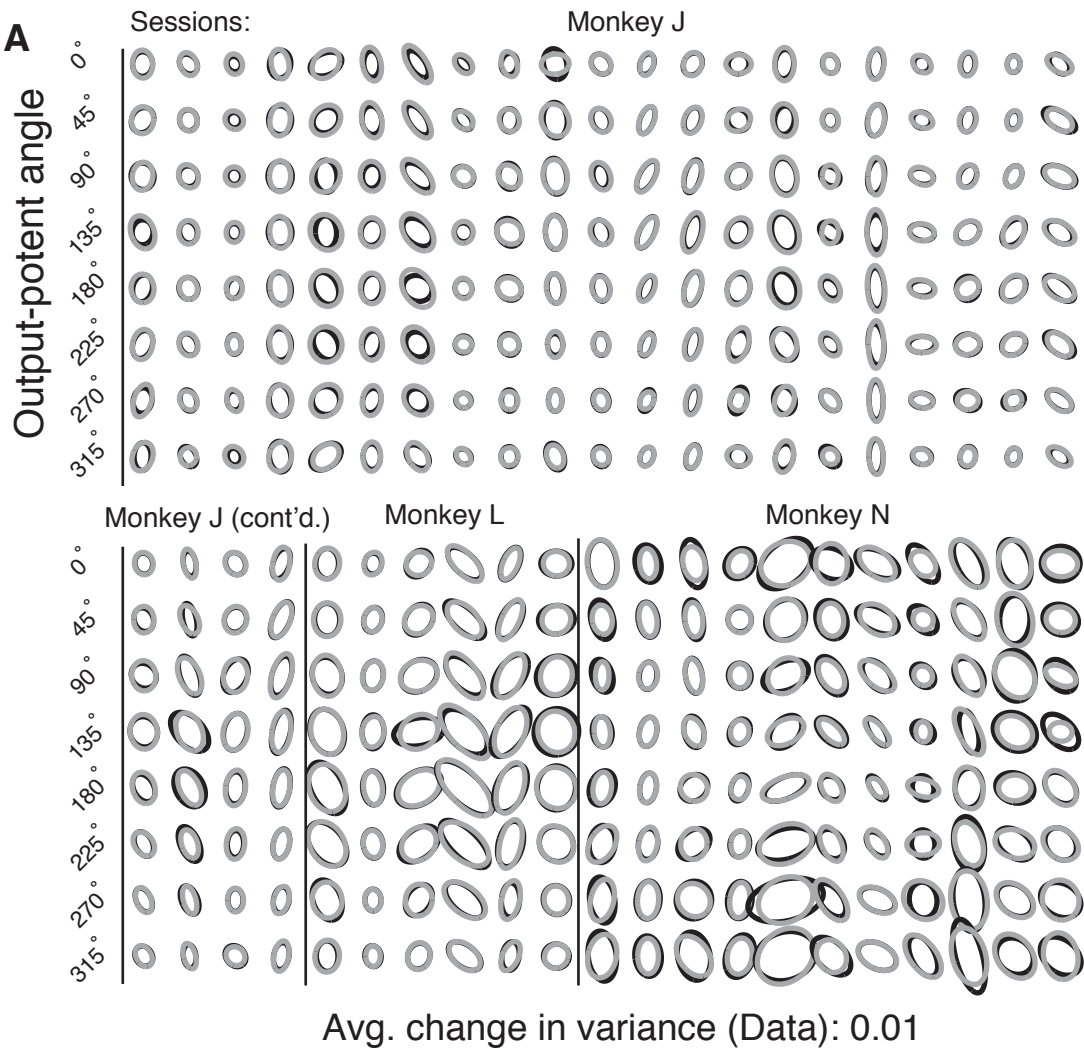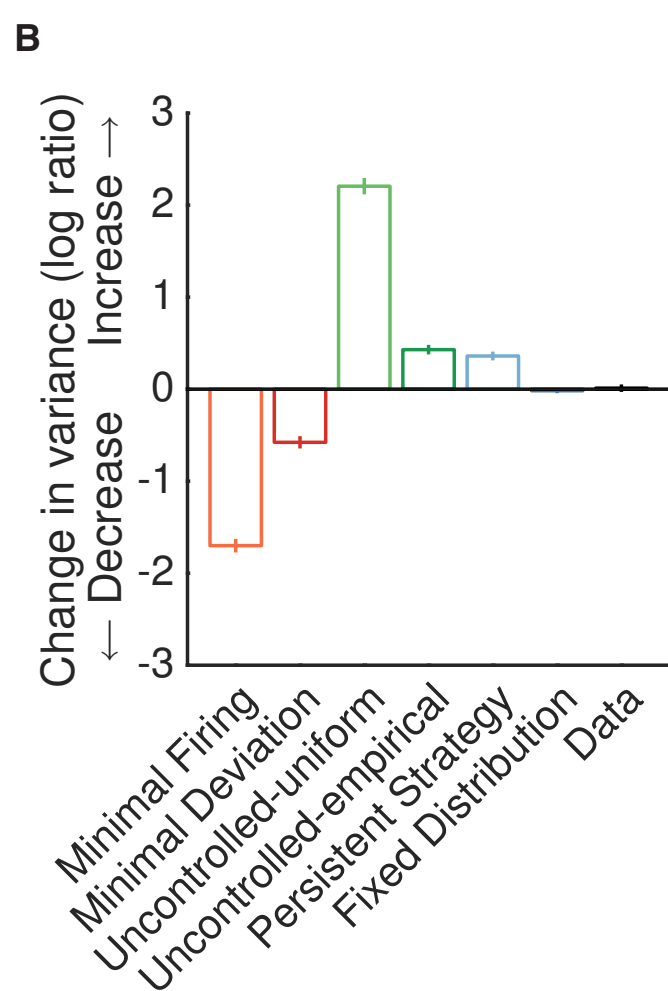

Supplement: supp [file elife-36774-supp-v1.zip › elife_poa_e36774_Figure_6_figure_supplement_1.pdf]

**A**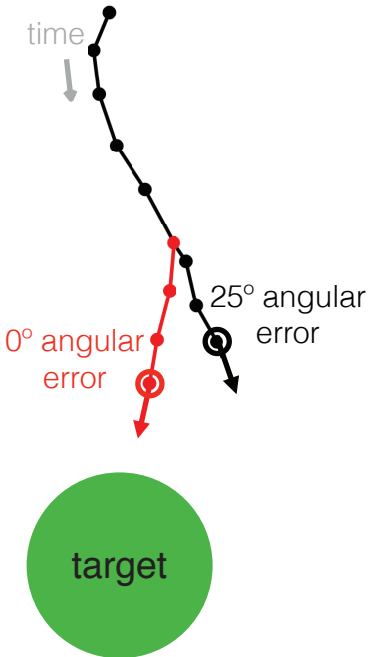**B**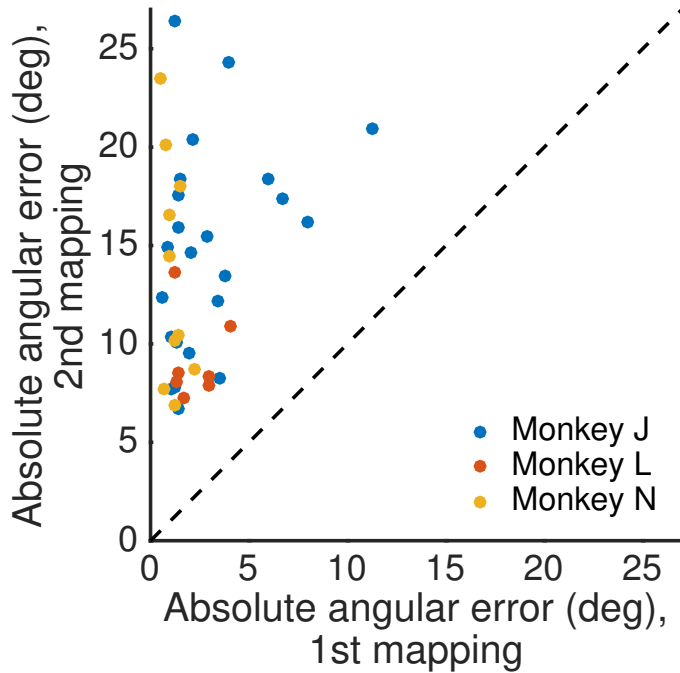**C**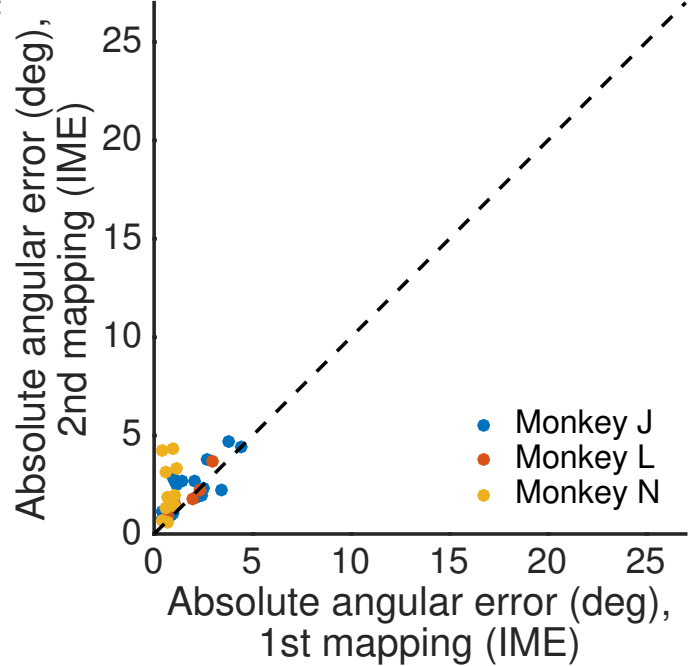

Supplement: supp [file elife-36774-supp-v1.zip › elife_poa_e36774_Figure_5_figure_supplement_4.pdf]

**A**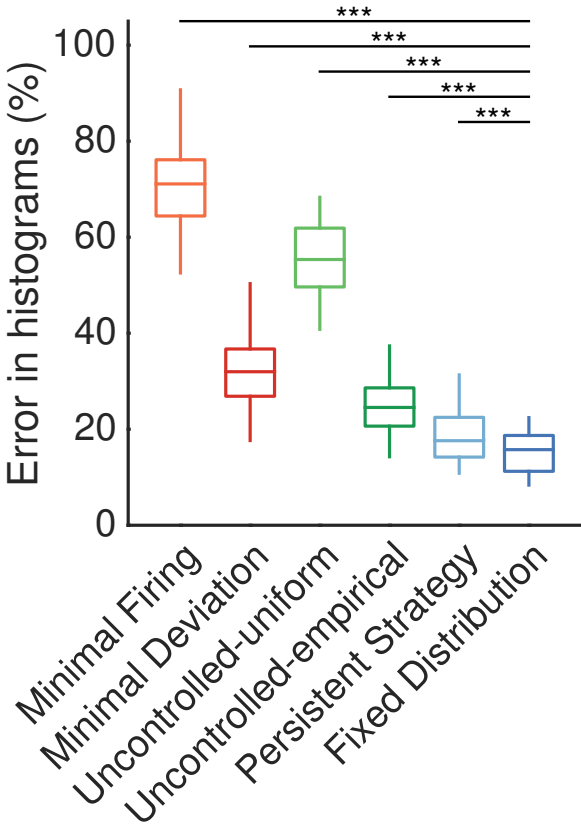**B**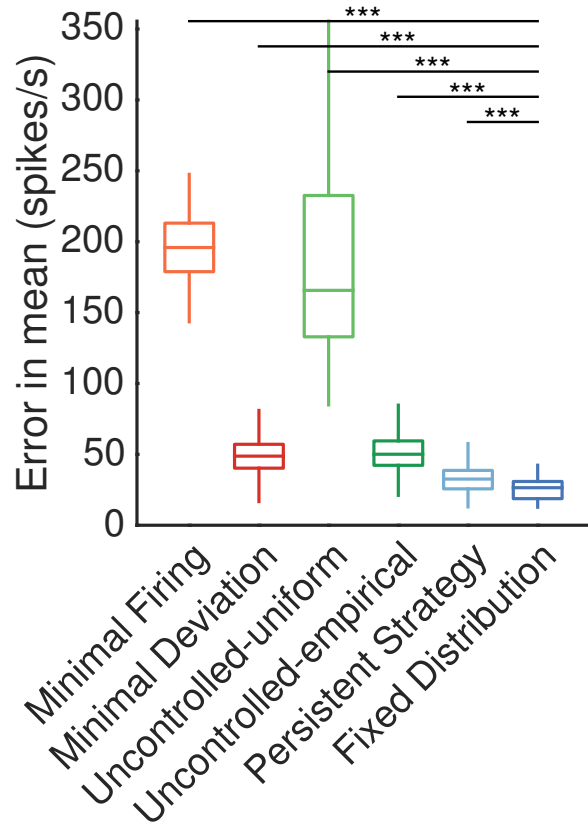**C**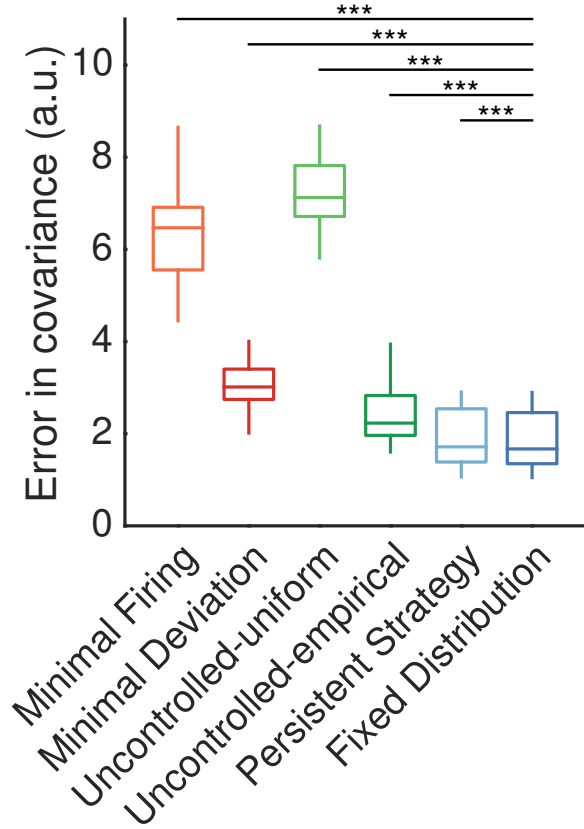

Supplement: supp [file elife-36774-supp-v1.zip › elife_poa_e36774_Figure_5_figure_supplement_2.pdf]

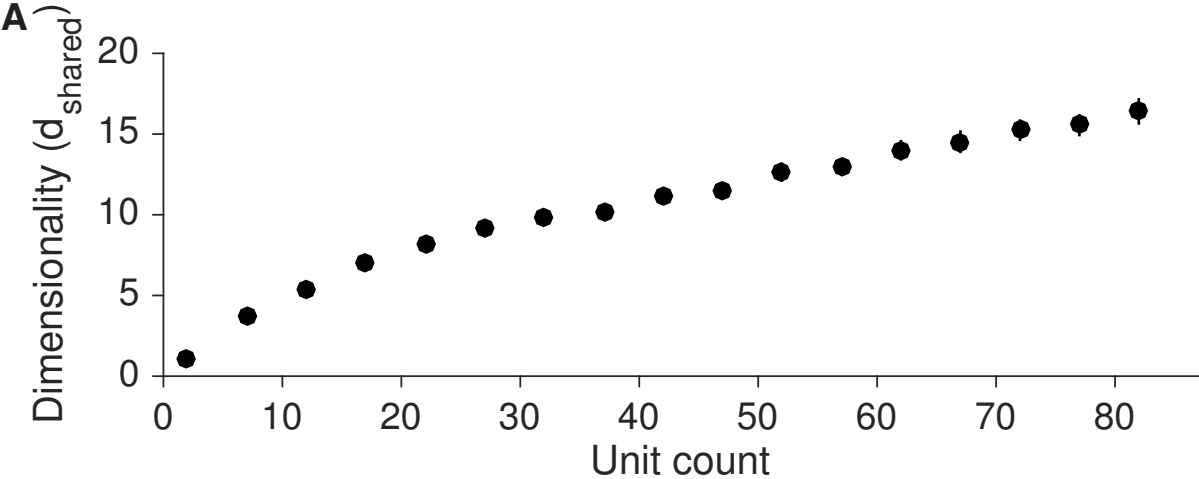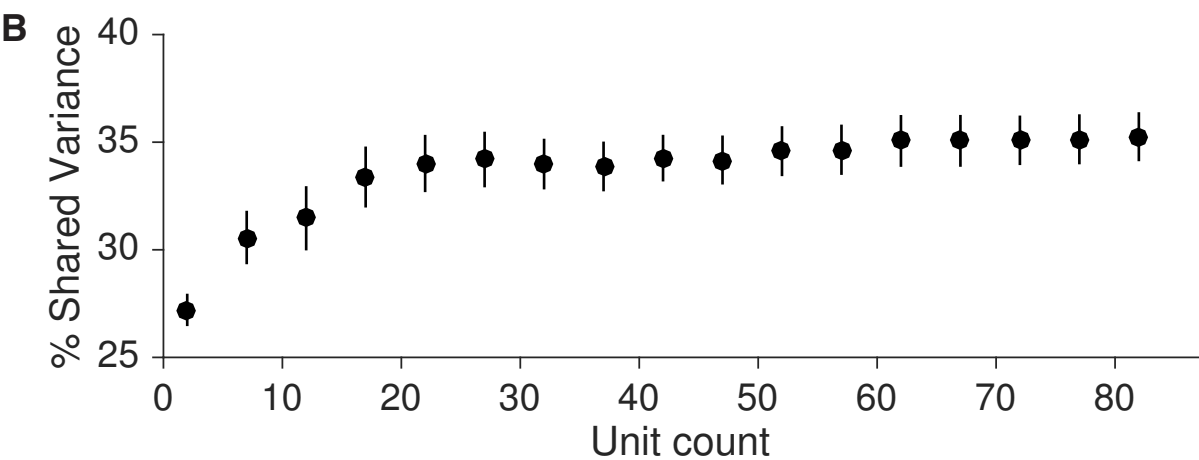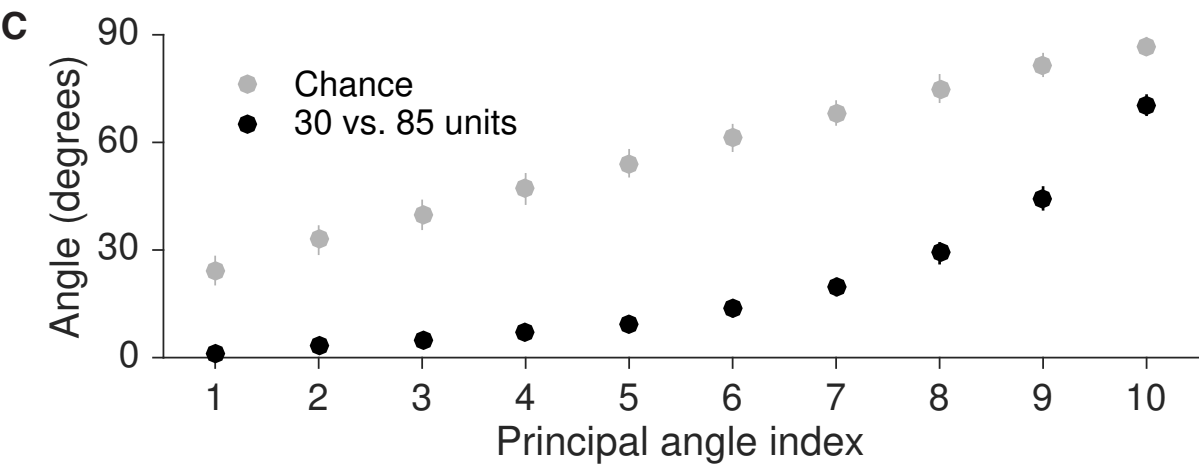

Supplement: supp [file elife-36774-supp-v1.zip › elife_poa_e36774_Appendix_figure_1.pdf]

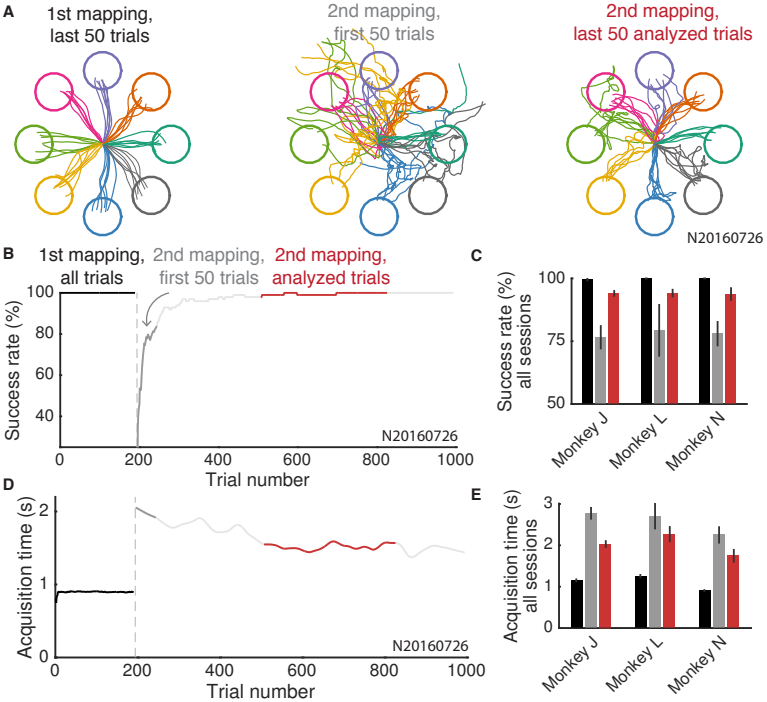

Supplement: supp [file elife-36774-supp-v1.zip › elife_poa_e36774_Figure_1_figure_supplement_1.pdf]

**A**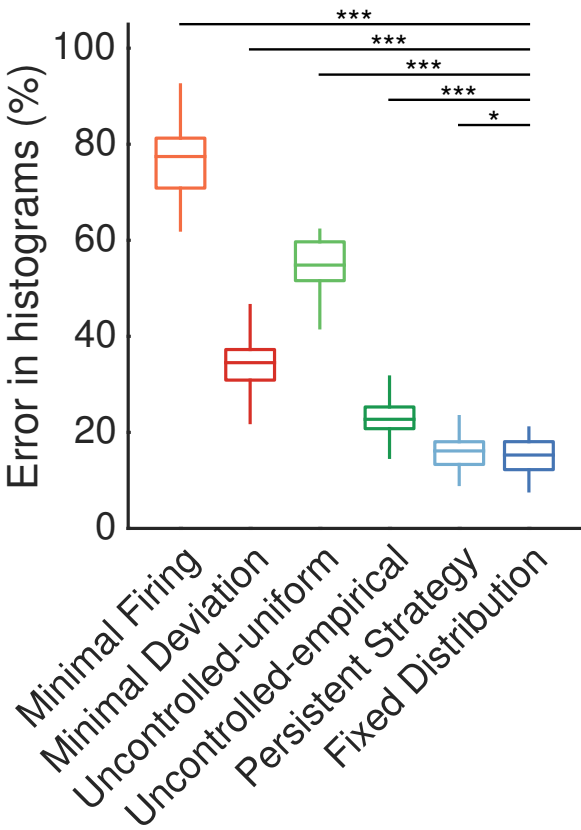**B**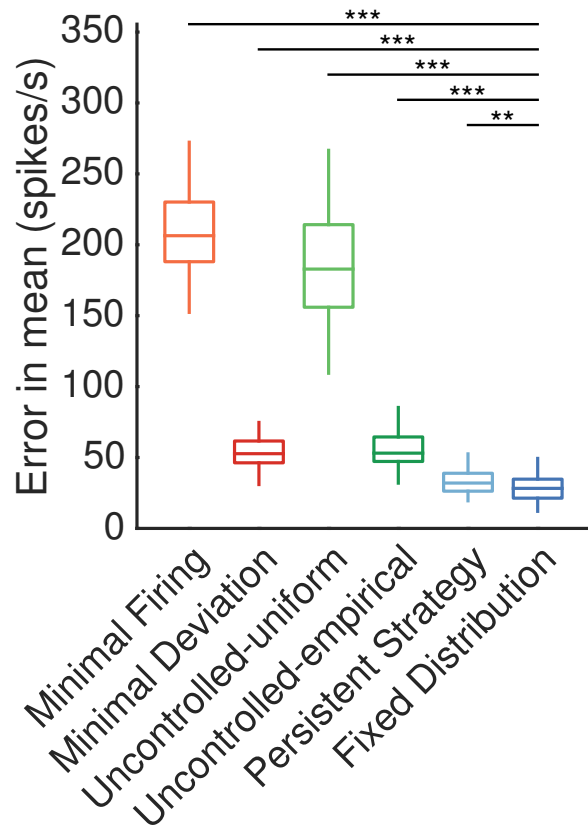**C**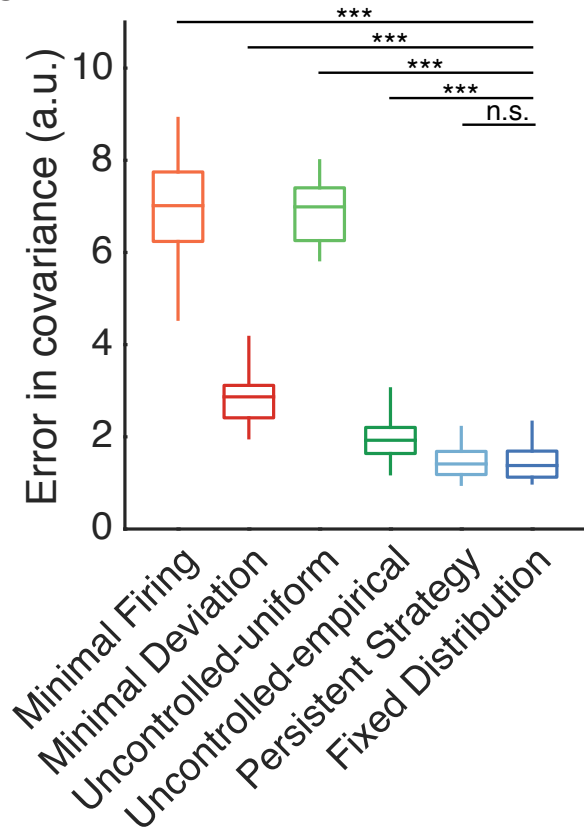

Supplement: supp [file elife-36774-supp-v1.zip › elife_poa_e36774_Figure_5_figure_supplement_3.pdf]

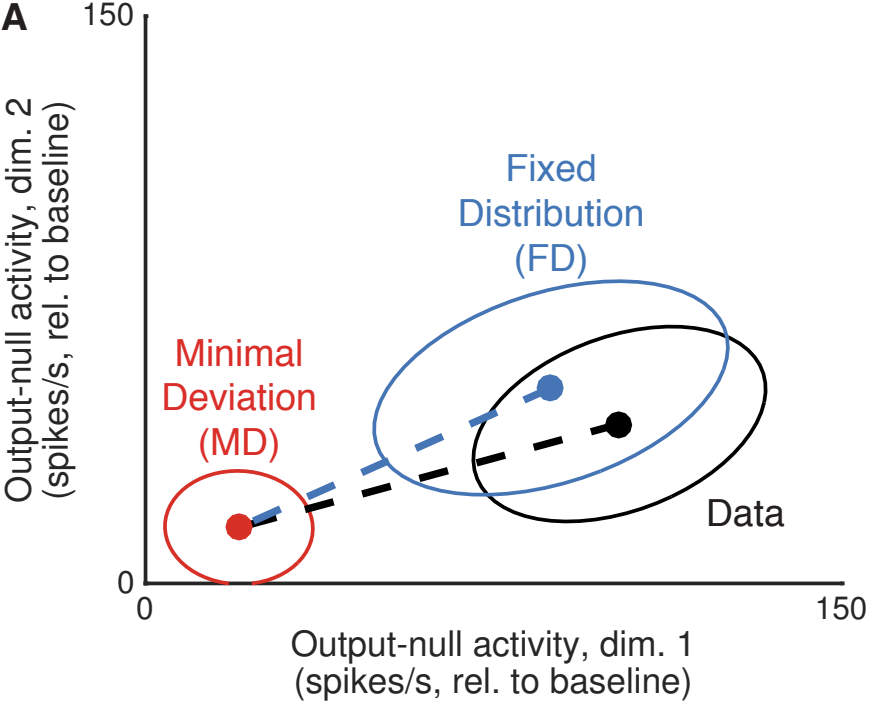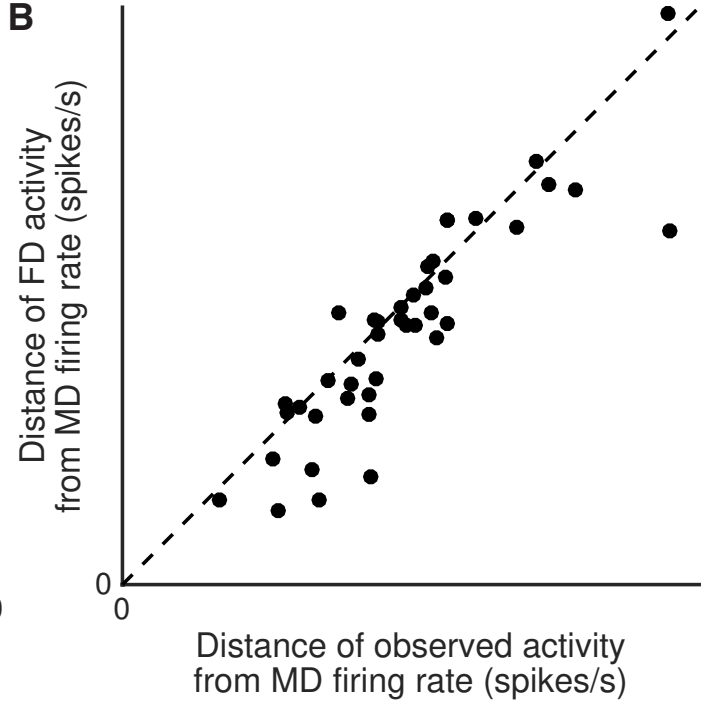

Supplement: supp [file elife-36774-supp-v1.zip › elife_poa_e36774_Figure_6_figure_supplement_2.pdf]

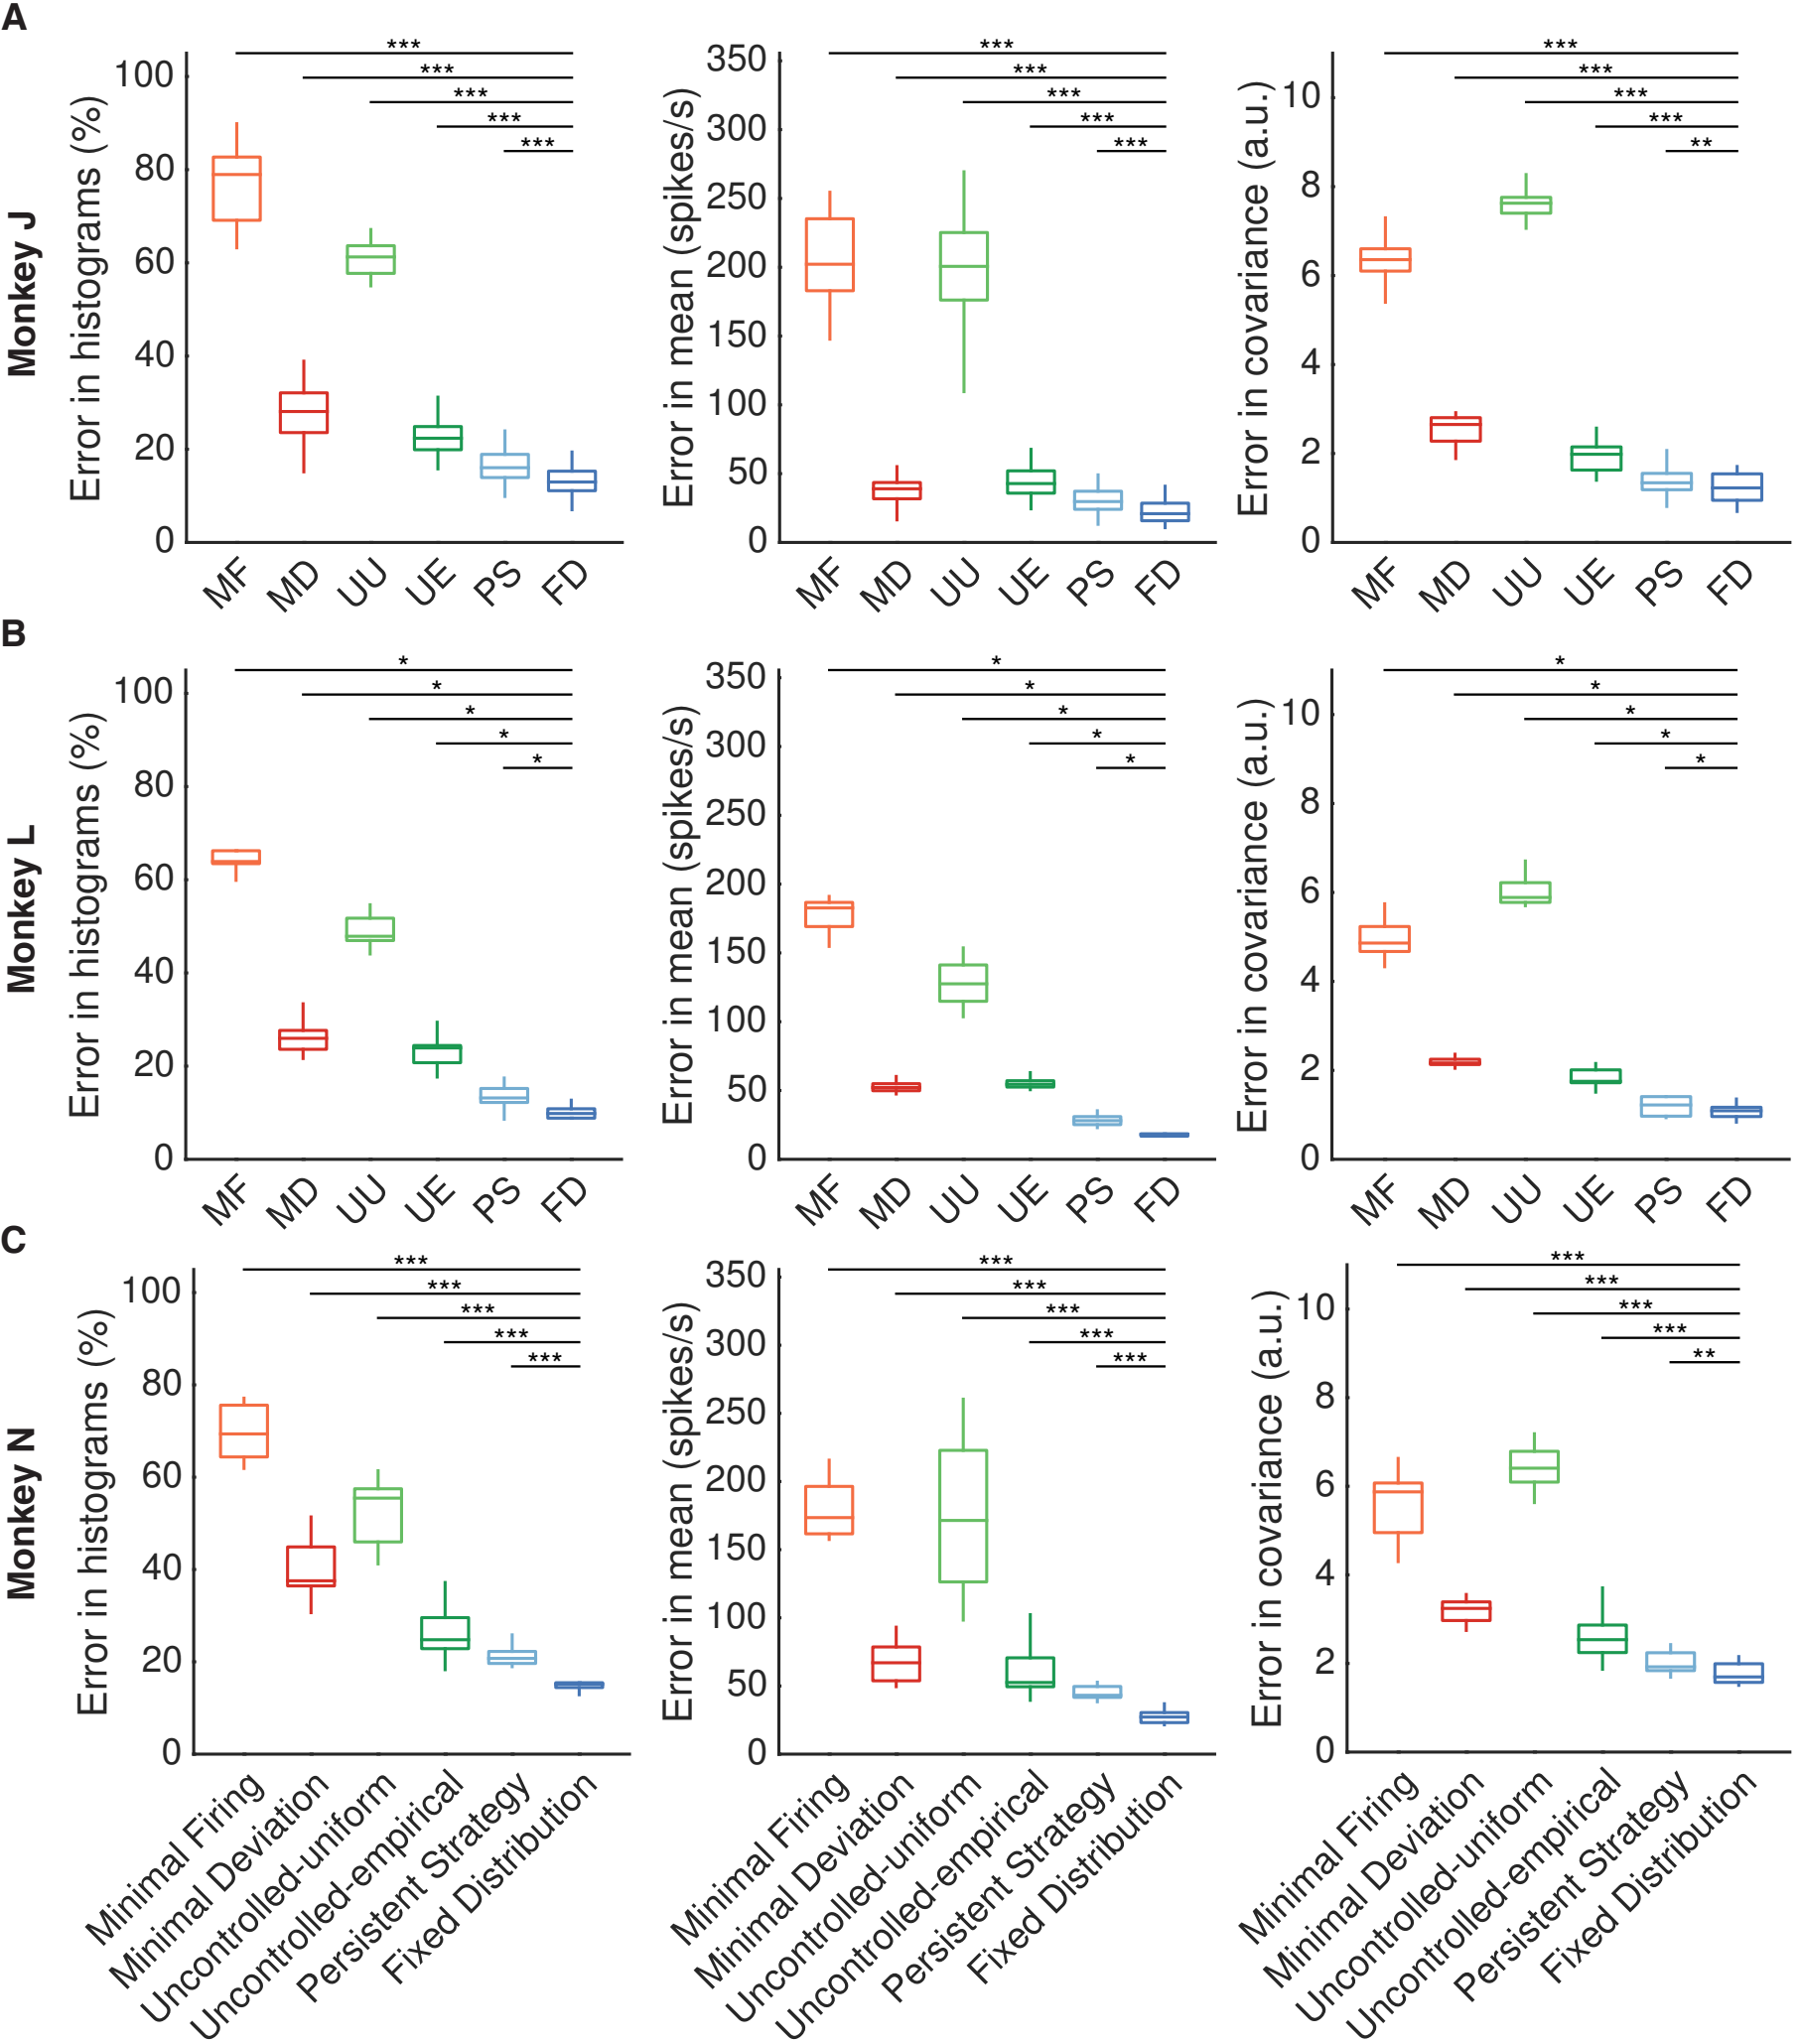

Supplement: supp [file elife-36774-supp-v1.zip › elife_poa_e36774_Figure_5_figure_supplement_1.pdf]
